1           **Muscle-specific Cavin4 interacts with Bin1 to promote**  
2           **T-tubule formation and stability in developing skeletal muscle**

3 Harriet P. Lo<sup>1</sup>, Ye-Wheen Lim<sup>1#</sup>, Zherui Xiong<sup>1#</sup>, Nick Martel<sup>1</sup>, Charles Ferguson<sup>1,2</sup>,  
4 Nicholas R. Ariotti<sup>1,3</sup>, Jean Giacomotto<sup>4,5</sup>, James A. Rae<sup>1,2</sup>, Matthias Floetenmeyer<sup>2</sup>,  
5 Shayli Varasteh Moradi<sup>6</sup>, Ya Gao<sup>1</sup>, Vikas A. Tillu<sup>1</sup>, Di Xia<sup>1</sup>, Huang Wang<sup>7</sup>, Samira  
6 Rahnama<sup>6</sup>, Susan J. Nixon<sup>1</sup>, Michele Bastiani<sup>1</sup>, Ryan D. Day<sup>1,8</sup>, Kelly A. Smith<sup>1,9</sup>,  
7 Nathan J. Palpant<sup>1</sup>, Wayne A. Johnston<sup>6</sup>, Kirill Alexandrov<sup>6</sup>, Brett M. Collins<sup>1</sup>, Thomas  
8 E. Hall<sup>1</sup> and Robert G. Parton<sup>1,2</sup>

9 # These authors contributed equally

10

11 <sup>1</sup>Institute for Molecular Bioscience and <sup>2</sup>Centre for Microscopy and Microanalysis, The  
12 University of Queensland, Brisbane, QLD 4072, Australia

13 <sup>3</sup>Current address: Mark Wainwright Analytical Centre, University of NSW, Sydney  
14 NSW 2052, Australia

15 <sup>4</sup>Queensland Brain Institute, The University of Queensland, Brisbane, QLD 4072,  
16 Australia

17 <sup>5</sup>Queensland Centre for Mental Health Research, West Moreton Hospital and Health  
18 Service and University of Queensland, Brisbane, QLD 4072, Australia.

19 <sup>6</sup>CSIRO-QUT Synthetic Biology Alliance, ARC Centre of Excellence in Synthetic  
20 Biology, Centre for Agriculture and the Bioeconomy, School of Biology and  
21 Environmental Science Queensland University of technology, Brisbane QLD 4001,  
22 Australia

23 <sup>7</sup>Translational Research Institute, Mater Research Institute, The University of  
24 Queensland, Brisbane, QLD 4072, Australia

25 <sup>8</sup>Current address: Institute for Marine and Antarctic Studies, University of Tasmania,  
26 Hobart, Tasmania, Australia

27 <sup>9</sup>Current address: Department of Physiology, The University of Melbourne, Parkville,

28 Victoria, Australia

29

30 Address correspondence to:

31 Robert G. Parton,

32 Institute for Molecular Bioscience

33 The University of Queensland

34 Brisbane QLD 4072

35 Australia

36 Tel: 61-7-3346-2032

37 Fax: 61-7-3346-2339

38 Email: [R.Parton@imb.uq.edu.au](mailto:R.Parton@imb.uq.edu.au)

39 **Summary**

40 The cavin proteins are essential for caveola biogenesis and function. Here, we identify  
41 a role for the muscle-specific component, Cavin4, in skeletal muscle T-tubule  
42 development by analyzing two vertebrate systems: mouse and zebrafish. In both  
43 models Cavin4 localized to T-tubules and loss of Cavin4 resulted in aberrant T-tubule  
44 maturation. In zebrafish, which possess duplicated *cavin4* paralogs, Cavin4b was  
45 shown to directly interact with the T-tubule-associated BAR domain protein, Bin1. Loss  
46 of both Cavin4a and Cavin4b caused aberrant accumulation of interconnected  
47 caveolae within the T-tubules, a fragmented T-tubule network enriched in Caveolin-3,  
48 and an impaired Ca<sup>2+</sup> response upon mechanical stimulation. We propose a role for  
49 Cavin4 in remodeling the T-tubule membrane early in development by recycling  
50 caveolar components from the T-tubule to the sarcolemma. This generates a stable T-  
51 tubule domain lacking caveolae that is essential for T-tubule function.

52

53 **Keywords: caveolae, skeletal muscle, T-tubule, cavin, caveolin**

## 54 **Introduction**

55 Caveolae are plasma membrane invaginations which are abundant in many  
56 mammalian cells, and are implicated in a number of fundamental cellular processes  
57 including mechanoprotection and mechanosensation, lipid homeostasis, endocytosis  
58 and regulation of signaling pathways (reviewed in Parton, 2018). The formation of  
59 caveolae requires a coordinated assembly involving two essential protein components,  
60 the caveolins and cavins. Caveolins were the first structural component of caveolae  
61 identified; Caveolin-1 (CAV1) and Caveolin-3 (CAV3) are essential for caveola  
62 formation in non-muscle and muscle cells, respectively (Drab et al., 2001; Fra et al.,  
63 1995; Hagiwara et al., 2000; Way and Parton, 1995). More recently, the cavin family  
64 of caveolae-associated coat proteins (Cavin1-4) have been described (Bastiani et al.,  
65 2009; Hansen et al., 2009; Hill et al., 2008; McMahon et al., 2009). Caveolae-  
66 associated protein-1 (Cavin1, previously known as PTRF) is widely expressed and is  
67 essential for caveolae formation, acting in concert with Cav1 (in non-muscle cells) and  
68 CAV3 (in muscle cells) to generate caveolae (Hill et al., 2008; Liu et al., 2008). Cavin2  
69 (SDPR) has the ability to shape caveolae and is required for caveola stability in  
70 endothelial cells in lung and adipose tissue, but not other tissues (Hansen et al., 2013).  
71 Cavin3 (SRBC) is not essential for caveola formation and is involved in caveolar  
72 endocytosis (McMahon et al., 2009). Muscle-specific Cavin4 (also referred to as  
73 MURC) is also not required for caveola formation, but may play a role in caveolar  
74 morphology (Bastiani et al., 2009; Ogata et al., 2014; Ogata et al., 2008). Whilst the  
75 association between caveolin and cavin is crucial for caveola formation, previous  
76 studies have demonstrated the individual ability of the caveolins and cavin to generate  
77 membrane curvature (Hansen et al., 2009; Kovtun et al., 2014; Walser et al., 2012).  
78 Moreover, cavin family members show tissue-specific expression, pointing to

79 regulation of the cavin complex at a transcriptional level (Bastiani et al., 2009; Hansen  
80 et al., 2013).

81 In skeletal muscle, caveolae can account for as much as 50% of the muscle fiber  
82 surface (Lo et al., 2015). Consistent with early electron microscope studies proposing  
83 that caveolae function as membrane reservoirs in response to increasing membrane  
84 tension (Dulhunty and Franzini-Armstrong, 1975; Lee and Schmid-Schonbein, 1995),  
85 evidence for caveolae protecting the cell surface against mechanical damage has now  
86 been well documented in skeletal muscle (Lo et al., 2015; Seemann et al., 2017; Sinha  
87 et al., 2011), as well as in endothelial cells (Cheng et al., 2015), the zebrafish  
88 notochord (Lim et al., 2017). Additional roles for caveolae and caveolar components  
89 in skeletal muscle have been derived from studies of the transverse(T)-tubule system,  
90 a crucial feature of the muscle surface comprising an extensive network of tubules that  
91 penetrate deep into the muscle interior, allowing the propagation of action potentials  
92 to facilitate synchronized calcium release (reviewed in Franzini-Armstrong, 2018). The  
93 mature T-system has a unique lipid and protein composition distinct from the  
94 sarcolemma; how this is generated and maintained is not yet clear. Early  
95 morphological studies showed striking chains of interconnected caveolae in  
96 developing embryonic muscle (Ishikawa, 1968) and later studies showed that these  
97 networks were positive for both the T-tubule marker, DHPR, and for CAV3 (Lee et al.,  
98 2002; Parton et al., 1997). Further studies showed similarities between T-tubules and  
99 caveolae in their sensitivity to cholesterol manipulation (Carozzi et al., 2000). A loss of  
100 CAV3 in mice causes T-tubule abnormalities, although T-tubules still develop (Galbiati  
101 et al., 2001). It is also apparent that while embryonic T-tubules possess caveolar  
102 morphology and components, mature T-tubules in mammals lose their caveolae as the  
103 membrane is remodeled (Parton et al., 1997; Schiaffino et al., 1977). How this is  
104 achieved remains unknown.

105 Muscle-specific CAVIN4 was originally identified as a CAVIN2-interacting protein in  
106 cardiomyocytes, where its overexpression led to cardiac defects in mice (Ogata et al.,  
107 2008). Mutations in *CAVIN4* were reported to cause dilated cardiomyopathy in humans  
108 and expression of these mutations in rat cardiomyocytes led to reduced RhoA activity,  
109 lower mRNA levels of hypertrophy markers and smaller myocyte size (Rodriguez et  
110 al., 2011). However, the presence of these *CAVIN4* variants and others in the ExAC  
111 database (<http://exac.broadinstitute.org/>), suggest that these mutations may be  
112 potential disease modifiers, rather than primary disease-causing mutations  
113 (Szabadosova et al., 2018). The functional role of Cavin4 in skeletal muscle has not  
114 been studied in detail. In mature human and mouse skeletal muscle, CAVIN4 localized  
115 to the sarcolemmal membrane (Bastiani et al., 2009). CAVIN4 expression also  
116 increased in response to injury-induced muscle regeneration via activation of the ERK  
117 pathway (Tagawa et al., 2008). A *cavin4b* zebrafish mutant has been described,  
118 displaying smaller muscle fibers and impaired swimming ability (Housley et al., 2016).  
119 Therefore, current evidence suggests that Cavin4 may be involved in muscle repair  
120 and/or maintaining cell volume; however, the precise molecular pathways involved  
121 require further investigation.

122 In this study, we have sought to define the function of Cavin4 in vertebrate skeletal  
123 muscle. By using both mouse and zebrafish systems we have uncovered a role for  
124 Cavin4 in the development of the specialized surface-connected membrane system in  
125 muscle. By taking advantage of the rapid and synchronized development of the T-  
126 tubule system in the zebrafish embryo we show that Cavin4 is required for the  
127 structural and functional maturation of the T-tubules. Cavin4 interacts with the T-  
128 tubule-associated BAR domain protein, Bin1. In the absence of Cavin4, T-tubules fail  
129 to lose caveolar components and remodel, and as a result, interconnected caveolae  
130 accumulate in the T-tubule. This aberrant structure is associated with fragmentation of

131 the T-tubules and functional defects in calcium ion ( $\text{Ca}^{2+}$ ) release. We conclude that  
132 Cavin4 plays a crucial role in removal of caveolae during development, a process  
133 required for remodeling of the developing T-tubule membrane and for the formation of  
134 a stable and functional excitation-contraction system.

135

## 136 **Results**

### 137 **Characterization of caveolar protein expression in the mouse and zebrafish**

138 In order to study the role of Cavin4 in skeletal muscle fibers, we examined the  
139 expression profile of *cavin4* and other caveolar proteins in both the mouse and the  
140 zebrafish, the latter being a well-characterized model of muscle development and  
141 function (Berger and Currie, 2012; Keenan and Currie, 2019). In the adult mouse,  
142 caveolar components were expressed in both skeletal muscle and heart, with  
143 comparatively strong expression levels of the muscle-specific caveolar components,  
144 *Cavin4* and *Cav3* (**Figure 1A-B**). In adult zebrafish skeletal muscle, we observed  
145 strong expression levels of *cav3*, and *cavin4a* and *cavin4b* (the two orthologs of  
146 mammalian *Cavin4*), with an overall pattern of caveolar gene expression similar to that  
147 of mammalian skeletal and heart muscle (**Figure 1C**). In contrast, there were very low  
148 expression levels of *cavin4a* and *cavin4b* in the adult zebrafish heart (**Figure 1D**).  
149 Western analysis also demonstrated a lack of Cavin4b in adult zebrafish heart tissue  
150 (**Figure S1A**).

151 Consistent with this, spatial examination of *cavin4a* and *cavin4b* expression using  
152 whole mount *in situ* hybridization (ISH) in developing zebrafish embryos revealed  
153 strong expression of both *cavin4a* and *cavin4b* in the myotome at 24 and 48 hours  
154 post-fertilization (hpf), but *cavin4* expression was not observed in the heart up to 7  
155 days post-fertilization (dpf) (**Figures 1E and S1B-C**). Intriguingly, the two *cavin4*  
156 paralogs were expressed at different regions within in the myotome, with *cavin4a*

157 expressed throughout the somites, while *cavin4b* was expressed predominantly at the  
158 somite boundaries. Therefore, *cavin4a* and *cavin4b* are expressed predominantly in  
159 the developing zebrafish myotome in overlapping but distinct expression patterns, and  
160 the zebrafish heart shows a strikingly different complement of caveolae proteins similar  
161 to non-muscle tissues.

162

### 163 **Cavin4 localizes to the sarcolemma and T-tubules of developing muscle fibers**

164 CAVIN4 localizes to the sarcolemmal membrane in mature mouse muscle (Bastiani et  
165 al., 2009) and to both the sarcolemma and T-tubules in cardiomyocytes from adult  
166 mice (Ogata et al., 2014). However, skeletal muscle T-tubules are morphologically  
167 distinct from those in cardiac tissue. Unlike cardiac T-tubules, mature skeletal muscle  
168 T-tubules lack morphological caveolae (Levin and Page, 1980; Parton et al., 1997).  
169 Cardiac T-tubules are also a less specialized plasma membrane domain; they are not  
170 only transverse, but have protrusions in many directions and vary in diameter from 20  
171 to 450 nm, compared with skeletal muscle T-tubules which are much smaller with a  
172 diameter of 20 to 40 nm (Franzini-Armstrong et al., 1975; Ibrahim et al., 2011; Savio-  
173 Galimberti et al., 2008). Therefore, we examined the distribution of CAVIN4 in  
174 developing mouse skeletal muscle. Similar to that observed for CAV3 (Parton et al.,  
175 1997), CAVIN4 localized to internal structures consistent with T-tubule localization in  
176 embryonic skeletal muscle (before birth, 16.5 days post coitum [dpc]), but 3 days after  
177 birth CAVIN4 was predominantly localized to the sarcolemmal membrane with little  
178 internal staining (**Figure 1F**). We also examined the localization of CAVIN4 in the well-  
179 characterized C2C12 skeletal muscle cell line. In differentiated C2C12 myotubes,  
180 CAVIN4 localized to both the sarcolemma and to internal networks, overlapping with  
181 CAV3 immunolabeling, consistent with an association with developing T-tubules  
182 (**Figure 1G**).



183 We next analyzed the localization of Cavin4a and Cavin4b in more detail by generating  
184 stable transgenic zebrafish lines expressing Clover-tagged forms of these proteins  
185 (**Figure 1H**). In developing muscle fibers, both Cavin4a and Cavin4b showed strong  
186 localization to the sarcolemma and T-tubules. Quantitation of the ratio of T-tubule to  
187 sarcolemmal fluorescence intensity for Cavin4a-Clover revealed that the level of  
188 Cavin4a associated with the T-tubules decreased significantly over time (3-19 dpf,  
189 **Figures 1I-J and S1D**). In comparison, Cavin1a (the muscle-specific ortholog of  
190 CAVIN1 (Lo et al., 2015)) was expressed predominantly at the sarcolemma, with only  
191 low levels observed in the T-tubule system, and the ratio of T-tubule to sarcolemmal  
192 intensity for Cavin1a-Clover was relatively unchanged over the same time period.  
193 These observations strongly suggest a specific role for Cavin4, possibly independent  
194 of caveolae, in the developing T-tubule system.

195

### 196 **A loss of CAVIN4 leads to ultrastructural abnormalities and a redistribution of** 197 **CAV3 in mouse skeletal muscle**

198 To investigate the effect of a loss of CAVIN4 in skeletal muscle, we first performed a  
199 transient knockout of *Cavin4* in mouse embryos using a CRISPR/Cas9-based  
200 approach. Three single guide RNAs (sgRNAs) were designed for targeted deletion of  
201 exon 1 of *Cavin4*; sgRNAs and Cas9 mRNA were microinjected into zygotes and  
202 embryos transferred into pseudopregnant female mice. Skeletal muscle was collected  
203 from pups 3 days after birth, when CAV3 is predominantly associated the sarcolemma  
204 (Parton et al., 1997). PCR-based genotyping analysis identified 5 of 20 pups as likely  
205 to harbor homozygous deletions of *Cavin4*; immunostaining of hindlimb muscle  
206 revealed a loss of CAVIN4 in these 5 pups (**Figure S2A**). Additional Western blot  
207 analysis and qRT-PCR revealed no detectable levels of CAVIN4 in *Cavin4*<sup>-/-</sup> mouse  
208 tissue, demonstrating the efficacy of this approach for generating knockout tissue  
209 (**Figure S2B-C**). Interestingly, expression analysis of the classical T-tubule marker

210 *Bin1* (Butler et al., 1997) showed a trend towards upregulation in the absence of  
211 CAVIN4 (**Figure S2D**).

212 Muscle tissue from two *Cavin4*<sup>-/-</sup> mice were used for further analysis. Immunostaining  
213 revealed that a loss of CAVIN4 was associated with increased internal labeling for  
214 CAV3 (**Figure 2A**). The ratio of fluorescence intensity of sarcolemma:internal labeling  
215 was significantly reduced in *Cavin4*<sup>-/-</sup> muscle fibers, consistent with a higher level of  
216 internal labeling (**Figure 2B**). Electron microscopic comparison of WT and *Cavin4*<sup>-/-</sup>  
217 muscle revealed increased accumulation of tubular membranous elements between  
218 myofibers in the absence of CAVIN4 (**Figure 2C-F**). Sparse tubular and vesicular  
219 elements between myofibers could be observed in WT muscle. In contrast, *Cavin4*<sup>-/-</sup>  
220 muscle had numerous long tubular elements, including stacked arrays of tubular  
221 structures, between the myofibers that were rarely seen in control muscle.  
222 Stereological analysis on random sections of WT and *Cavin4*<sup>-/-</sup> muscle revealed a 2-  
223 fold increase in the volume of the inter-fiber membrane system (from 3.82% of the  
224 cytoplasmic volume to 8.73%, **Figure 2G**).

225 In parallel, we also created a *Cavin4*<sup>-/-</sup> C2C12 cell line using CRISPR/Cas9 technology.  
226 A single clonal line was identified harboring a homozygous deletion; Western blot and  
227 qRT-PCR analysis confirmed the absence of Cavin4 in this cell line (**Figure S2F-G**).  
228 Similar to that observed in muscle tissue, immunostaining for CAV3 revealed more  
229 internal aggregates and a less extensive internal network in the absence of CAVIN4  
230 (**Figure S2E**). We further noted a significant upregulation of *Bin1* expression in the  
231 absence of CAVIN4 (**Figure S2H**).

232 Taken together, these observations suggested that the redistribution of CAV3 from the  
233 developing T-tubules to the sarcolemma, a process that occurs from 15 dpc until a few  
234 days after birth in the mouse embryo (Parton et al., 1997), was perturbed in the  
235 absence of CAVIN4.

236 **A complete loss of Cavin4 in zebrafish embryos causes significant structural T-**  
237 **tubule abnormalities and functional defects**

238 To date, detailed analyses of T-tubule development have been difficult in mammalian  
239 systems due to a slow and asynchronous process of T-tubule development. We have  
240 recently characterized this process extensively in the developing zebrafish embryo  
241 using light microscopy, three-dimensional (3D) electron microscopy and semi-  
242 automated quantitative assays of T-tubule development (Hall et al., 2020); this system  
243 overcomes many of the challenges of the mammalian system and is amenable to  
244 precise mechanistic dissection. We therefore generated knockout zebrafish models for  
245 both *cavin4a* and *cavin4b*, and crossed these lines to obtain a zebrafish line completely  
246 lacking Cavin4 (*cavin4a;cavin4b* double mutant, hereafter referred to as *cavin4<sup>-/-</sup>*; see  
247 **Figures S3-S4** and Methods section for a detailed description of the generation and  
248 characterization of individual *cavin4a<sup>-/-</sup>* and *cavin4b<sup>-/-</sup>* lines).

249 *Cavin4<sup>-/-</sup>* embryos were viable and morphologically similar to WT embryos (**Figure**  
250 **S5A**). However, while we were able to generate adult *cavin4<sup>-/-</sup>* zebrafish, they were  
251 poor breeders, hampering the generation of homozygous clutches; experiments were  
252 therefore performed using homozygous x heterozygous crosses, with pre- or post-  
253 genotyping to identify *cavin4<sup>-/-</sup>* embryos. To visualize the muscle fibers, we crossed the  
254 *cavin4<sup>-/-</sup>* line to a stable transgenic line expressing ubiquitous GFP-CaaX, which  
255 effectively delineates the sarcolemma and T-tubules (Hall et al., 2020; Williams et al.,  
256 2011). Imaging of transverse sections from 5 dpf WT embryos revealed GFP  
257 localization at the sarcolemma and at the T-tubules in a characteristic radial “spoke-  
258 like” pattern (**Figure 3A**). In *cavin4<sup>-/-</sup>* embryos however, we observed striking  
259 abnormalities within the T-tubules of some muscle fibers, where the radial T-tubule  
260 pattern was fragmented and aggregates observed instead (**Figures 3A and S5B**).  
261 These T-tubule abnormalities persisted to 10 dpf (**Figure S5C**). However, these

262 abnormalities were not present in juvenile *cavin4*<sup>-/-</sup> zebrafish; at 30 dpf normal T-tubule  
263 structures were observed, albeit with more longitudinally-oriented tubules (**Figure**  
264 **S5D**).

265 In view of the effect of the loss of Cavin4 on the T-tubule system in mouse skeletal  
266 muscle, we next examined the distribution of Cav3. In zebrafish embryos, T-tubules  
267 are observed to penetrate from the sarcolemma to the fiber midline by 48 hpf (Hall et  
268 al., 2020). Imaging of a stable transgenic line expressing Cav3-GFP revealed that  
269 Cav3 was strongly associated with early T-tubules during zebrafish development (31  
270 hpf, **Figure 3B**). By 72 hpf, this association with the T-tubules was significantly  
271 decreased and Cav3-GFP was predominantly associated with the sarcolemma  
272 (**Figure 3B-C**), similar to that observed in mammalian muscle (Parton et al., 1997). We  
273 crossed the *cavin4*<sup>-/-</sup> line to the Cav3-GFP line; live imaging revealed T-system  
274 aberrations (see longitudinal intensity profiles, **Figure 3D**) and a significantly increased  
275 proportion of Cav3 associated with the T-tubules in the absence of Cavin4 (**Figure**  
276 **3E**). A similar redistribution to the T-tubules was observed in the absence of Cavin4a  
277 or Cavin4b suggesting similar but independent roles of the two *cavin4* paralogs (**Figure**  
278 **S3F-K**).

279 We next carried out detailed ultrastructural analyses of the WT and *cavin4*<sup>-/-</sup> muscle  
280 fibers. An approximate 60% reduction in relative caveola density, and dramatically  
281 reduced density of surface-connected T-tubules was observed in the absence of  
282 Cavin4 (**Figures 4A-C and S6A-B**). These aberrations were further investigated using  
283 serial blockface scanning electron microscopy followed by automated thresholding to  
284 reveal the 3D organization in the context of the whole muscle fiber. In WT muscle, the  
285 3D reconstruction highlighted the organized T-tubule structure throughout the muscle  
286 fiber and connecting to the muscle fiber surface (**Figure 4D-G**). In *cavin4*<sup>-/-</sup> muscle,  
287 however, there was a dramatic loss of T-tubule organization, with few connections to

288 the sarcolemmal surface (**Figure 4H-K**). We further assessed the fine structure of the  
289 remnant T-tubules both in thin sections and by using high resolution electron  
290 tomography with 300nm sections of zebrafish embryonic muscle. These techniques  
291 revealed that the remaining T-tubules in Cavin4-deficient muscle fibers had a striking  
292 bead-like morphology (**Figure 4L-M**). 3D reconstructions of these T-tubules showed  
293 that the morphology resembled interconnected caveolae (**Figure 4N, Movie S1**). In  
294 view of this striking similarity between the T-tubule morphology and the chains of  
295 caveolae observed in developing muscle (Ishikawa, 1968; Parton et al., 1997), and the  
296 increased Cav3 in the T-tubules of Cavin4-deficient muscle (**Fig 3D-E**), the results  
297 suggest that loss of Cavin4 leads to increased accumulation and/or decreased removal  
298 of caveolae from the T-tubule system. Overall, the ultrastructural observations highlight  
299 a decrease in sarcolemmal caveolae but an increase in caveola-like structures in the  
300 dysmorphic T-tubules of Cavin4-null muscle.

301 In view of the structural defects of the T-tubule system, we investigated whether the  
302 function of the T-tubule system in excitation-contraction coupling (Flucher, 1992) was  
303 perturbed in the absence of Cavin4. The *cavin4<sup>-/-</sup>* line was crossed into a stable  
304 transgenic line expressing the genetically encoded fluorescent Ca<sup>2+</sup> indicator, GCaMP.  
305 Muscle contraction was induced in zebrafish embryos using electrical stimulation  
306 which caused a sharp increase in GCaMP fluorescence intensity, followed by a  
307 decrease in intensity in the absence of stimulation (**Figure 5A**). We analyzed two  
308 aspects of the Ca<sup>2+</sup> response in our WT and *cavin4<sup>-/-</sup>* embryos: (1) decay of response,  
309 defined as the time in which the intensity of GFP dropped to 50% of the maximal  
310 intensity; and (2) amplitude, calculated as the ratio of fluorescence intensity above the  
311 minimum signal in the absence of stimulation. Decay did not appear to be affected in  
312 Cavin4-deficient muscle fibers, in comparison to WT muscle fibers (**Figure 5B**).

313 However, fluorescence amplitude was significantly reduced in *cavin4*<sup>-/-</sup> embryos in  
314 comparison to WT (**Figure 5C**).

315 In conclusion, a loss of Cavin4 in the zebrafish is associated with aberrant T-tubule  
316 morphology and a significantly reduced Ca<sup>2+</sup> response upon muscle contraction.

317

### 318 **A direct functional interaction between Cavin4 and Bin1 in T-tubule development**

319 Finally, we examined the possible molecular mechanisms underlying a loss of Cavin4.

320 We recently identified Bin1b/Amphiphysin-2, the muscle-specific BIN1 ortholog in

321 zebrafish (Smith et al., 2014), as a potential interactor of Cavin4b using proximity-

322 dependent biotin labeling and mass spectrometry (Xiong *et al*, unpublished,

323 <https://doi.org/10.1101/2020.11.05.370585>). BIN1 is a major driver of T-tubule

324 formation and has been closely linked to CAV3 in mammalian T-tubule development

325 (Lee et al., 2002). In view of these findings and the observed upregulation of *BIN1*

326 expression in the absence of CAVIN4 (**Figures S2D and S2H**), we hypothesized that

327 a functional interaction exists between Cavin4 and Bin1 during T-tubule development.

328 We first utilized a model cellular system as done previously (Hall et al., 2020; Lee et

329 al., 2002) to examine the possible association of Cavin4 with Bin1-induced tubules in

330 non-muscle cells. Co-expression of Bin1b and Cavin4b produced numerous

331 membrane tubular structures in BHK cells that were positive for both Bin1b and

332 Cavin4b (**Figure 5D**). In contrast, Cavin4b was not recruited to tubules generated by

333 the expression of the mCherry reporter or the early endosomal marker SNX8,

334 highlighting the specificity of the interaction (**Figure S6C-D**). Co-expression of the

335 mammalian orthologs (CAVIN4 and BIN1) revealed CAVIN4 was associated with

336 BIN1-positive tubules (**Figure 5E**) in a punctate localization pattern similar to that

337 observed for CAV3 and BIN1 (Lee et al., 2002).

338 We next used this system to examine whether expression of Cavin4 affected Bin1-

339 dependent tubule formation. Live cell imaging revealed that the formation of Bin1b-

340 positive tubules was dynamic and transient. By quantitating the formation of Bin1b-  
341 positive tubules in live BHK cells, we found that both the number of tubules and the  
342 size of tubules (tubule area and Feret's diameter) were significantly increased in the  
343 presence of Cavin4b (**Figures 5H-I and S6E-F**). These results suggest that Cavin4b  
344 enhances the formation of Bin1b-induced membrane tubules, implying a potential role  
345 for Cavin4 in promoting T-tubule formation.

346 To gain further insights into the possible mechanisms involved in Cavin4 recruitment  
347 to T-tubules, we examined whether there was a direct interaction between Cavin4b  
348 and Bin1b. The two proteins were co-expressed as fusions with mCherry and EGFP  
349 fluorescent proteins in a *Leishmania*-based cell-free system and their interaction was  
350 assessed using Amplified Luminescence Proximity Homogeneous Assay (AlphaLISA)  
351 technology. Pairwise assessment of Cavin4a, Cavin4b, Bin1a and Bin1b indicated a  
352 strong interaction between Cavin4b and Bin1b (**Figure 6A**). Consistent with this,  
353 Cavin4b-mCherry was also immunoprecipitated from BHK cells co-expressing GFP-  
354 tagged Bin1b (**Figures 6B and S6G**).

355 All Bin1 isoforms possess a Src homology 3 (SH3) domain that interacts with proteins  
356 containing a proline-rich domain (PRD) (Hohendahl et al., 2016). Notably, zebrafish  
357 Cavin4b possesses a putative Bin1-binding PRD between residues 271 to 286 within  
358 the Disordered Region 3 (DR3) domain (**Figure S6H**) (Hohendahl et al., 2016; Prokic  
359 et al., 2014). Therefore, we hypothesized that there could be an interaction between  
360 the Cavin4b PRD and the Bin1b-SH3 domain. As shown in **Figure 6C**, isothermal  
361 titration calorimetry (ITC) showed a significant interaction between the Cavin4b PRD  
362 peptide and the Bin1b-SH3 domain ( $K_d$   $61.7 \pm 2.8 \mu\text{M}$ ). Full length Cavin4b and Bin1b-  
363 SH3 showed an interaction with a similar affinity ( $K_d$   $55.9 \pm 2.4 \mu\text{M}$ ) suggesting that no  
364 other major SH3 binding domain exists outside of the PRD motif. A peptide from the  
365 Chikungunya virus (CHIKV) (**Figure S6H**) harbors a proline-rich motif and has a  
366 remarkable affinity for the human BIN1-SH3 domain (Tossavainen et al., 2016). We



367 also confirmed the interaction between the Bin1b-SH3 domain and CHIKV peptide  
368 using ITC and found that there was a conserved high affinity for the peptide ( $K_d$  88.9 ±  
369 2.85 nM, similar to the interaction with human BIN1-SH3 (Tossavainen et al., 2016);  
370 **Figure S6I**). To confirm the Cavin4b PRD binds to Bin1b-SH3 in the canonical binding  
371 site, we performed a competitive binding assay using the high affinity CHIKV peptide.  
372 As expected, Cavin4b PRD binding was blocked by the competing CHIKV peptide  
373 (**Figure 6C**). Cavin4a, which does not possess the PRD in its DR3, did not show any  
374 binding affinity towards Bin1b-SH3 (**Figure 6C**). In addition, mutation of the PRD of  
375 Cavin4b (P274A/P276T) abolished its localization to Bin1b-positive tubules (**Figure**  
376 **5F**), demonstrating that this domain is required for Cavin4 recruitment to model T-  
377 tubules in this system. Zebrafish Cavin4a that lacks a similar PRD showed no  
378 recruitment to Bin1b-positive tubules (**Figure 5G**).

379 Interaction of proteins with the Bin1-SH3 domain via PRDs has been shown to promote  
380 Bin1-driven tubulation (Wu and Baumgart, 2014), consistent with the effect of Cavin4  
381 expression on T-tubule formation. We therefore hypothesized that high expression of  
382 Bin1 might rescue a loss of Cavin4 *in vivo*. To test this hypothesis, we injected a DNA  
383 construct encoding mkate2-tagged Bin1b into zebrafish embryos at the one-cell stage.  
384 This transient mosaic expression of Bin1b allowed us to compare expressing and non-  
385 expressing muscle fibers. Bin1b localized to the membrane and T-tubules of skeletal  
386 muscle fibers in transverse sections from WT embryos, overlapping with GFP-CaaX  
387 expression (**Figures 6D and S7**). Strikingly, *cavin4<sup>-/-</sup>* muscle fibers expressing Bin1b  
388 showed normal T-tubule structure (based on GFP-CaaX expression pattern), revealing  
389 that high expression of Bin1b rescued the T-tubule defects caused by lack of Cavin4.

390 Live imaging in longitudinal muscle fibers also showed restored distribution of Cav3-  
391 GFP to the sarcolemmal membrane in *cavin4<sup>-/-</sup>* embryos (**Fig 6E**).

392 In conclusion, these results suggest an interplay between Bin1 and Cavin4 in T-tubule  
393 formation and stability. Cavin4b binds directly to zebrafish Bin1b to be recruited to the



394 developing T-tubule system and may help promote Bin1-induced tubulation. Loss of  
395 Cavin4 disrupts T-tubule structure and function, but can be rescued by high Bin1  
396 expression.

397

## 398 **Discussion**

399 Caveolar-specific roles have been established for Cavins1-3 (reviewed in Parton et al.,  
400 2018). While the function of Cavin4 has been investigated in the heart (Ogata et al.,  
401 2014; Ogata et al., 2008), its role in skeletal muscle development and caveolae  
402 function has not been extensively explored. In this study, we have used a number of  
403 complementary approaches to investigate the role of Cavin4 in skeletal muscle. Taking  
404 advantage of the zebrafish as a highly tractable model system, we demonstrate that  
405 Cavin4 is a direct interactor of Bin1 and plays a crucial role in the remodeling of the T-  
406 tubule system during muscle development.

407

### 408 **Cavin4 is associated with developing T-tubules in skeletal muscle**

409 In mammalian skeletal muscle, CAV3 is associated with the T-tubules during  
410 development, shifting to a predominantly sarcolemmal association as the muscle  
411 matures (Parton et al., 1997). Our findings demonstrated a similar transition profile for  
412 CAVIN4 in developing mouse muscle. In addition, our stable transgenic zebrafish lines  
413 revealed that Cavin4a, Cavin4b and Cav3 are similarly associated with developing T-  
414 system in the zebrafish, with a redistribution to the sarcolemma concomitant with  
415 muscle maturation. The overall profile of *cavin* and *caveolin* expression in zebrafish  
416 trunk muscle was comparable to whole tissue from mouse skeletal muscle and heart.  
417 Our findings that cardiac caveolar components are generally of low abundance in the  
418 zebrafish has implications for the many studies suggesting that caveolar localization is  
419 essential for the functioning of many components required for cardiac function,

420 including vital modulators of contractility (Balijepalli and Kamp, 2008). These  
421 differences should be considered when using the zebrafish as a model system for  
422 caveolar function in the heart. For the purpose of our study, a negligible expression  
423 level of Cavin4 in the zebrafish heart allowed us to examine Cavin4 in the zebrafish in  
424 a skeletal muscle-specific manner.

425

#### 426 **A model for Cavin4 in T-tubule membrane remodeling during development**

427 Using a transient CRISPR approach in mouse embryos, we showed that a loss of  
428 CAVIN4 in mouse skeletal muscle led to an increase in membranous elements  
429 between myofibers. This was accompanied by an increase in internal labeling for  
430 CAV3, suggesting that redistribution of CAV3 from the developing T-tubule system to  
431 the predominantly sarcolemmal distribution in mature muscle was perturbed or  
432 delayed. In view of the difficulties in dissecting the precise role of Cavin4 in muscle  
433 development in mouse embryos, in which skeletal muscle maturation is a slow and  
434 asynchronous process, we used the zebrafish and our recently developed methods  
435 (Hall et al., 2020). We generated a zebrafish line completely lacking Cavin4 by  
436 knockout of both Cavin4 paralogs for the first time. Contrary to findings by Housley et  
437 al., 2016, who reported an increase in caveolae density in *cavin4b*<sup>-/-</sup> fish, we observed  
438 a significant reduction in sarcolemmal caveolae density in the absence of Cavin4,  
439 consistent with a regulatory but non-essential role for Cavin4 in caveola formation. We  
440 further identified Ca<sup>2+</sup> handling defects in the absence of Cavin4, indicative of a role in  
441 T-tubule function.

442 The most dramatic phenotype associated with a loss of Cavin4 was the fragmentation  
443 of the embryonic T-tubule network. In addition, aberrant accumulation of Cav3 in the  
444 T-tubules was a feature of *cavin4*<sup>-/-</sup> muscle; this phenomenon was observed in fish  
445 lacking either Cavin4a or Cavin4b, suggesting non-compensatory roles for the two

446 proteins. The fragmented T-tubule pattern seen in the absence of Cavin4 is similar to  
447 that observed with the expression of Dynamin-2 (DNM2) hypermorphic mutants in  
448 C2C12 cells (Chin et al., 2015) and suggests a role for Cavin4 in T-tubule organization  
449 and stability. Although dramatic, *cavin4*<sup>-/-</sup> fish can nonetheless recover and survive to  
450 adulthood.

451 Electron tomography revealed a striking array of interconnected caveola-like structures  
452 in the remaining T-tubules of *cavin4*<sup>-/-</sup> muscle fibers. These lobed bead-like structures  
453 extended from the surface several microns into the interior of the muscle fibers and  
454 appear to represent a highly modified T-tubule structure. Earlier morphological studies  
455 suggested that T-tubules develop as interconnected networks of budding caveolae;  
456 these structures have been described in myotubes and developing muscle fibers and  
457 have been suggested to represent an intermediate in the formation of T-tubules  
458 (Franzini-Armstrong, 1991; Ishikawa, 1968; Parton et al., 1997). The association of  
459 CAV3 with these precursor T-tubules therefore appears to be an intermediate stage in  
460 development of the T-tubule system. However, complete loss of CAV3 does not cause  
461 a loss of T-tubules in mammalian cells and simple eukaryotes, such as *Drosophila*,  
462 have a T-tubule system without a detectable caveolin homolog showing that T-tubule  
463 formation is not dependent on caveolae (Galbiati et al., 2001; Kirkham et al., 2008).  
464 How then might our current observations showing T-tubule fragmentation and  
465 apparent accumulation of Cav3/caveolae in T-tubules in the absence of Cavin4 be  
466 reconciled with the proposed role of caveolae in T-tubule formation and the reported  
467 similarity in mechanisms of T-tubule and caveola formation (Carozzi et al., 2000;  
468 Parton et al., 1997)? As Cav3 is restricted to the sarcolemmal caveolae of mature  
469 mammalian skeletal muscle, it appears that Cav3/caveolae is recycled back to the  
470 plasma membrane upon T-tubule maturation (Parton et al., 1997; Schiaffino et al.,  
471 1977). We speculate that the accumulation of caveolae and Cav3 in the T-tubules is a

472 consequence of the similarities in lipid environment of the two domains (Carozzi et al.,  
473 2000) and is crucial for the formation of both structures. However, a key stage of  
474 muscle maturation is the subsequent removal of caveolae from the T-tubule as the  
475 distinct sarcolemmal protein and lipid composition of mature muscle T-tubules is  
476 generated. Based on our data, we now hypothesize that Cavin4 is required for the  
477 cycling of caveolae back to the plasma membrane and that disruption of this process  
478 causes caveolae to accumulate in the T-tubules (**Figure 7**). The inability to recycle  
479 caveolae out of the T-tubules may cause alterations in T-tubule structure and stability.  
480 It may also explain the reduction in sarcolemmal caveola density in our knockout  
481 models; caveola distribution is shifted towards the T-tubule. The high density of pit-like  
482 caveolae in a tubule might make the membrane more susceptible to damage or inhibit  
483 addition of new membrane and may potentially alter the lipid and protein composition  
484 of the T-system. In this model, Cavin4 could directly participate in recycling back to  
485 the sarcolemma or could be required to shape the caveolar membrane sufficiently to  
486 allow other machinery to associate and cause caveolar budding out of the T-tubule.  
487 While the precise mechanism remains to be defined, the results provide an explanation  
488 for the association of caveolae with the forming T-tubule system and demonstrate the  
489 consequences of a lack of remodeling of this crucial membrane domain.

490

#### 491 **Cavin4 interacts with Bin1 to enhance T-tubule stability**

492 We show evidence here using multiple approaches that Cavin4 interacts with  
493 Bin1/Amphiphysin-2, an N-terminal BAR domain protein that plays a fundamental role  
494 in T-tubule biogenesis (Lee et al., 2002), and that this interaction occurs between the  
495 Bin1b SH3-binding domain and Cavin4b PRD. Using a model cell system we could  
496 show that Cavin4b was both recruited to and increased the formation of Bin1b-induced  
497 membrane tubules. This is consistent with published findings showing that SH3

498 domain ligands can augment the ability of Bin1 to sense and generate membrane  
499 curvature (Wu and Baumgart, 2014) and implicates Cavin4 as a positive modulator of  
500 Bin1 activity. In view of this model we speculated that increased Bin1 expression could  
501 rescue the loss of Cavin4 by driving T-tubule tubulation. This was shown to be the case  
502 as high expression of Bin1 rescued the effect of the loss of Cavin4 in formation of an  
503 intact T-tubule network. Interestingly, high expression of Bin1b in the absence of  
504 Cavin4 was also able to restore Cav3 redistribution to the sarcolemmal membrane,  
505 suggesting that Bin1 activity is also required for efficient recycling of T-tubule  
506 components from the developing T-tubules and linking the activity of Cavin4 in  
507 promoting Bin1-dependent tubulation and in caveolar recycling. The precise  
508 mechanisms involved await further mechanistic dissection but the results are  
509 consistent with our observation that a loss of CAVIN4 in mouse muscle led to  
510 upregulation of BIN1 expression, possibly as a compensatory mechanism. Based on  
511 our findings, we propose a model whereby Bin1 drives tubule formation, which is  
512 enhanced by the recruitment of Cavin4. In the absence of Cavin4, T-tubules become  
513 unstable and fragment, and caveolae are no longer able to diffuse or recycle via  
514 membrane traffic out of the T-tubules. Our findings also emphasize the the robustness  
515 of the development the skeletal muscle T-tubule system. Indeed, even Bin1 is not  
516 essential for T-tubule formation as downregulation of DNM2 can ameliorate the lethal  
517 *Bin1*<sup>-/-</sup> phenotype in mice (Cowling et al., 2017). Whether the loss of Cavin4 also leads  
518 to increased DNM2 activity, which is reduced by the expression of Bin1, is also an  
519 intriguing possibility.

520

521 In conclusion, we show here a role for Cavin4 and Bin1 in the remodeling of the T-  
522 tubule system in developing skeletal muscle. The interaction between Cavin4 and Bin1

523 identified in this study also highlights a potential role for Cavin4 as a genetic modifier  
524 in Bin1- and Dnm2-related myopathies.

525

## 526 **Acknowledgments**

527 The authors are grateful to Emmanuel Boucrot for discussions regarding Bin1, and to  
528 Michael Kozlov and Gonen Golani for discussion and comments on the manuscript.

529 We thank Dominic Hunter for assistance with cell-free expression constructs. This work  
530 was supported by a fellowship and grants from the National Health and Medical

531 Research Council of Australia (grant number APP1156489 to R.G. Parton; grant  
532 number APP1099251 to R. G. Parton and T. E. Hall), as well as the Australian

533 Research Council (grant number DP200102559 to T.E. Hall and R. G. Parton),  
534 Australian Research Council Centre of Excellence in Convergent Bio-Nano Science

535 and Technology (grant number CE140100036 to R. G. Parton) and Australian  
536 Research Council Centre of Excellence in Synthetic Biology (grant number

537 CE200100029 to K. Alexandrov). The work was supported in part by CSIRO-QUT  
538 Synthetic Biology Alliance. J. Giacomotto was supported by a NHMRC Emerging

539 Leader Fellowship (1174145). We are also grateful to the University of Queensland  
540 Major Equipment and Infrastructure Scheme. Confocal microscopy was performed at

541 the Australian Cancer Research Foundation (ACRF)/Institute for Molecular Bioscience  
542 (IMB) Dynamic Imaging Facility for Cancer Biology, established with funding from the

543 ACRF. The authors acknowledge the use of the Australian Microscopy & Microanalysis  
544 Research Facility at the Center for Microscopy and Microanalysis at The University of

545 Queensland. Mouse genome editing was performed by the Transgenic Animal Service  
546 of Queensland (TASQ) and Queensland Facility for Advanced Genome Editing

547 (QFAGE), The University of Queensland.

548

549 **Figure Legends**

550 **Figure 1. Cavin4 is associated with T-tubules of developing muscle fibers.**

551 **(A-B)** qRT-PCR of caveola-associated genes (relative to *36B4*) in adult WT mouse  
552 skeletal muscle (A) and heart tissue (B) (mean±SD; n=3 each for muscle and heart).  
553 Reactions were performed in the following groups: *Cav1* and *Cavin1*; *Cav2* and *Cav3*;  
554 *Cavin2*, *Cavin3* and *Cavin4*. **(C-D)** qRT-PCR of caveola-associated genes (relative to  
555  $\beta$ -actin) in WT adult zebrafish trunk muscle (C) and heart (D) (mean±SD; n=3 for trunk  
556 muscle, n=3 pooled samples for heart tissue). **For A-D:** muscle genes shown in order  
557 of decreasing expression; heart genes shown in the same order as for muscle  
558 samples. **(E)** Wholemout *in situ* hybridization pattern for *cavin4a* and *cavin4b* in 10-  
559 14 somite (S) and 48 hpf WT zebrafish embryos. *Cavin4a* was expressed throughout  
560 the myotome. *Cavin4b* expression was detected in adaxial cells (white arrowheads),  
561 pectoral fin buds (black arrow) and somite boundaries (black arrowheads). Images for  
562 48 hpf shown in dorsal and lateral view; bottom panel=magnification of boxed areas.  
563 All images anterior to left. See also Figure S1B-C. **(F)** CAVIN4 immunostaining in  
564 mouse skeletal muscle before birth (16.5 dpc) and 3 days after birth (3d). Arrowheads  
565 indicate internal labeling. Bar, 10 $\mu$ m. **(G)** Confocal z-section of CAVIN4 and CAV3 in  
566 C2C12 myotubes. Arrow indicates sarcolemmal staining. Insets=magnification of  
567 boxed area. Bar, 20 $\mu$ m. **(H)** Clover-tagged Cavin4a, Cavin4b and Cavin1a in muscle  
568 fibers of 3 dpf transgenic zebrafish embryos. Inverted images=magnification of boxed  
569 area. Bar, 20 $\mu$ m. **(I-J)** Ratio of T-tubule:sarcolemmal fluorescence intensity for  
570 Cavin4a (I) and Cavin1a (J). n=9 muscle fibers from 3 embryos per line for each  
571 developmental stage (mean±SD, one-way ANOVA with multiple-comparison Tukey's  
572 test). \*\*\*\*P $\leq$ 0.0001; \*P $\leq$ 0.05. See also Figure S1D.

573 **Figure 2. Loss of CAVIN4 in mouse skeletal muscle causes ultrastructural**  
574 **abnormalities and redistribution of CAV3.**

575 **(A)** CAVIN4 (with Phalloidin-Alexa488 counterstain, inset) and CAV3 immunostaining  
576 of WT and *Cavin4*<sup>-/-</sup> 3-day old mouse skeletal hindlimb muscle. Inverted  
577 images=magnification of area highlighted by asterisk. Bar, 20  $\mu$ m. **(B)** Ratio of  
578 sarcolemmal:internal CAV3 fluorescence intensity in WT and *Cavin4*<sup>-/-</sup> skeletal  
579 hindlimb muscle (mean $\pm$ SD, n=2 each of WT and *Cavin4*<sup>-/-</sup> samples). Quantitation was  
580 performed in coded (blinded) samples; colored circles represent measurements from  
581 individual images. \*P $\leq$ 0.05. **(C-F)** Electron microscopy of hindlimb skeletal muscle  
582 from 3-day old WT or *Cavin4*<sup>-/-</sup> pups. In WT muscle (C-D), sparse vesicular elements  
583 were visible between the myofibers, generally as vesicular or short tubular structures.  
584 In contrast, *Cavin4*<sup>-/-</sup> muscle (E-F) exhibited numerous long tubular elements between  
585 the myofibers often forming complex stacked arrays (E) not seen in WT muscle.  
586 Tubular structures highlighted in green in D and F. Bars, 1  $\mu$ m. **(G)** Comparison of  
587 membrane:cytosolic volume (%) in WT and *Cavin4*<sup>-/-</sup> muscle (mean $\pm$ SD, n=2 each of  
588 WT and *Cavin4*<sup>-/-</sup> samples). Colored circles represent separate images. \*\*\*\*P $\leq$ 0.0001.  
589 **Figure 3. *Cavin4*<sup>-/-</sup> zebrafish embryos have an aberrant T-system and increased**  
590 **association of Cav3 with T-tubules.**

591 **(A)** Transverse sections of WT and *cavin4*<sup>-/-</sup> 5 dpf embryos expressing EGFP-CaaX.  
592 Asterisk indicates corresponding muscle fiber in higher magnification inverted image  
593 on right. Arrows indicate abnormal puncta observed in *Cavin4*-deficient muscle fibers.  
594 Bar, 10  $\mu$ m. A more severe example is shown in Figure S5B. **(B)** Cav3-EGFP in  
595 developing zebrafish embryos at 31, 48 and 72 hpf. Inverted images in bottom panel  
596 represent boxed areas. Bar, 10  $\mu$ m. **(C)** Ratio of T-tubule:sarcolemma intensity in n=5  
597 embryos for each timepoint in B (n=3 selected areas per embryo, represented as  
598 colored circles; mean $\pm$ SD; nested one-way ANOVA; \*\*\*\*P $\leq$ 0.0001). **(D)** Cav3-EGFP  
599 in 5 dpf WT, *cavin4*<sup>-/-</sup> and *cavin4*<sup>+/-</sup> (sibling) embryos. Inverted images in middle panel  
600 represent boxed areas. Box scan quantitation (bottom panel; AU=arbitrary units)



601 highlights loss of T-tubule periodicity in *cavin4*<sup>-/-</sup> embryo. Bar, 10  $\mu$ m. **(E)** Ratio of T-  
602 tubule:sarcolemma intensity in n=8 embryos from two clutches each for WT, *cavin4*<sup>-/-</sup>  
603 and *cavin4*<sup>+/-</sup> (n=3 selected areas per embryo, represented as colored circles;  
604 mean $\pm$ SD; nested one-way ANOVA; \*\*\*\*P $\leq$ 0.0001; ns, not significant).

605 **Figure 4. Electron microscopy reveals T-tubule irregularities in *cavin4*<sup>-/-</sup>**  
606 **zebrafish muscle.**

607 **(A-B)** Ultrastructural analysis of 5 dpf WT (A) and *cavin4*<sup>-/-</sup> (B) embryos. Normal  
608 sarcomeric structure and T-system was observed in WT muscle; abundant caveolae  
609 are highlighted by arrowheads. Few caveolae were observed in *cavin4*<sup>-/-</sup> muscle. See  
610 also Figure S6A-B. Bars, 1 $\mu$ m. **(C)** Relative caveolae density was 40.3 $\pm$ 14.7 % in  
611 muscle fibers from 5 dpf *cavin4*<sup>-/-</sup> embryos in comparison to WT embryos (mean $\pm$ SD;  
612 \*\*P $\leq$ 0.01). Quantitation was performed on randomly selected images from 3 embryos  
613 from 3 different clutches. **(D-G)** Single section showing ultrastructure of skeletal  
614 muscle from a 5 dpf WT zebrafish embryo (D). A single muscle fiber was chosen (E,  
615 boxed area in D) and density-based thresholding used to segment the T-tubules. 3D  
616 reconstruction (F-G) demonstrates the normal radial distribution of T-tubules in WT  
617 muscle. **(H-K)** Single section showing ultrastructure of skeletal muscle from a 5 dpf  
618 *cavin4*<sup>-/-</sup> zebrafish embryo (H). A single muscle fiber (I, boxed area in H) was chosen  
619 and density-based thresholding used to segment the T-tubules. 3D reconstruction (J-  
620 K) demonstrates abnormal T-tubule morphology in *cavin4*<sup>-/-</sup> muscle. **(L-M)** Remaining  
621 T-tubules in *cavin4*<sup>-/-</sup> muscle fibers had caveolar structure (arrows). Bars, 1 $\mu$ m. **(N)** 3D  
622 reconstruction of T-tubule area from a *cavin4*<sup>-/-</sup> embryo. Inset (N') represents boxed  
623 area. Bar, 500 nm. See also Movie S1.

624 **Figure 5. Cavin4b is recruited to Bin1b-positive tubules in BHK cells.**

625 **(A)** Confocal z-section of GCaMP expression in the muscle fibers of a WT zebrafish  
626 embryo, with line scan measurement of GCaMP intensity observed in response to

627 electrical stimulation, measuring GFP intensity (y-axis) over time (s, x-axis). Bar, 20  
628  $\mu\text{m}$ . **(B)** Half-life decay of GCaMP signal in response to electrical stimulation was  
629  $35.1\pm 2.6$  and  $36.4\pm 3.0$  arbitrary time units in WT and *cavin4*<sup>-/-</sup> muscle fibers,  
630 respectively (mean $\pm$ SD; ns, not significant). Values for individual embryos shown as  
631 colored circles (n=6, 5 and 2 each of WT and *cavin4*<sup>-/-</sup> embryos from 3 independent  
632 clutches, average of at least 3 fiber measurements per embryo). **(C)** Amplitude  
633 (calculated as change in fluorescence intensity,  $\Delta F/F$ ) of GCaMP signal in response  
634 to electrical stimulation was  $0.8\pm 0.2$  and  $0.6\pm 0.2$  in WT and *cavin4*<sup>-/-</sup> muscle fibers,  
635 respectively (mean $\pm$ SD; \*\*P $\leq$ 0.01). Values for individual embryos shown as colored  
636 circles, respectively (n=6, 5 and 2 each of WT and *cavin4*<sup>-/-</sup> embryos from 3  
637 independent clutches, average of at least 3 fiber measurements per embryo). **(D-G)**  
638 BHK cells co-transfected with: EGFP-Bin1b/Cavin4b-mCherry (D), EGFP-  
639 BIN1/CAVIN4-mCherry (E). EGFP-Bin1b/Cavin4b(PRDMt)-mCherry (F) or EGFP-  
640 Bin1b/Cavin4a-mCherry (G). Colocalization of each fluorophore was analyzed by a  
641 line scan (as indicated) showing pixel intensity over the line distance (far right panel).  
642 Inset=line scan area. Images are representative of n=6 cells/group, three replicates  
643 performed. See also Figure S6C-D. Bar, 10  $\mu\text{m}$ . **(H)** Time-lapse imaging of BHK cells  
644 co-transfected with EGFP-Bin1b/mCherry or EGFP-Bin1b/Cavin4b-mCherry. Each  
645 frame was color coded and superimposed into a single image. White arrowheads  
646 indicate dynamic Bin1 tubules captured during time lapse. Bar, 10  $\mu\text{m}$ . **(I)** Scatter plot  
647 quantitation of number of Bin1b-positive tubules (normalized to cell size) in the  
648 presence of Cavin4b or mCherry reporter during live cell imaging over 6 min (n=5 cells;  
649 mean $\pm$ SD; nested t-test; \*\*P $\leq$ 0.01).

650 **Figure 6. Cavin4b interacts with Bin1b; abnormal T-tubule morphology can be**  
651 **ameliorated by high expression of Bin1b in *cavin4*<sup>-/-</sup> muscle fibers.**

652 **(A)** Cell-free expression in Leishmania extracts coupled with AlphaLISA showing  
653 pairwise comparison of binding between mCherry- and EGFP-tagged Cavin4a,  
654 Cavin4b, Bin1a and Bin1b. Red = positive interaction, blue = no interaction. An  
655 arbitrary threshold of 10,000 CPS of AlphaLISA signal was selected as the cut-off for  
656 a positive interaction. **(B)** Pulldown using GFPtrap with a maltose binding protein tag.  
657 Cavin4b-mCherry was co-expressed with Cavin4b-EGFP (positive control), EGFP-  
658 Bin1a, EGFP-Bin1b or EGFP (reporter only negative control) in BHK cells. EGFP and  
659 mCherry signal was detected by in-gel fluorescence after semi-denaturing PAGE.  
660 Representative blot from three replicates. Proteins in pulldown fraction appear as a  
661 doublet due to binding to maltose. Molecular weight markers (kDa) are shown on the  
662 right. See Figure S6H for entire gel. **(C)** Direct association of Bin1b SH3 domain with:  
663 full-length (FL) Cavin4a, FL Cavin4b and Cavin4b PRD as measured by ITC.  
664 Competitive inhibition of Bin1b SH3/Cavin4b PRD binding was observed by addition  
665 of CHIKV PRD. Three replicates performed. **(D)** Transverse sections of EGFP-CaaX  
666 expressing WT and *cavin4*<sup>-/-</sup> skeletal muscle with transient expression of Bin1b-  
667 mkate2. Asterisks show corresponding muscle fibers; inverted images in far right  
668 panel represent higher magnification of these fibers (top: EGFP-CaaX, bottom: Bin1b-  
669 mkate2). Bar, 10  $\mu$ m. See also Figure S7. **(E)** Live imaging Cav3-EGFP in 5 dpf WT  
670 and *cavin4*<sup>-/-</sup> embryos with transient expression of Bin1b-mkate2 (single channels  
671 shown as inverted images). Ratio of T-tubule:sarcolemma intensity in Bin1b-positive  
672 and Bin1b-negative muscle fibers from n=6 *cavin4*<sup>-/-</sup> embryos shown on right  
673 (individual embryos represented as colored circles; mean $\pm$ SD; \*P $\leq$ 0.05). Bar, 20  $\mu$ m.  
674 **Figure 7. Model of Cavin4-dependent recycling of caveolae/Cav3 to the**  
675 **sarcolemmal membrane.**

676 Under normal conditions in developing muscle fibers, Cavin4 removes caveolae/Cav3,  
677 which recycles back to the plasma membrane. In the absence of Cavin4,

678 caveolae/Cav3 accumulate within the T-tubules; the stability/formation of T-tubules is

679 improved by high expression of Bin1.

680

# Lo et al Figure 1

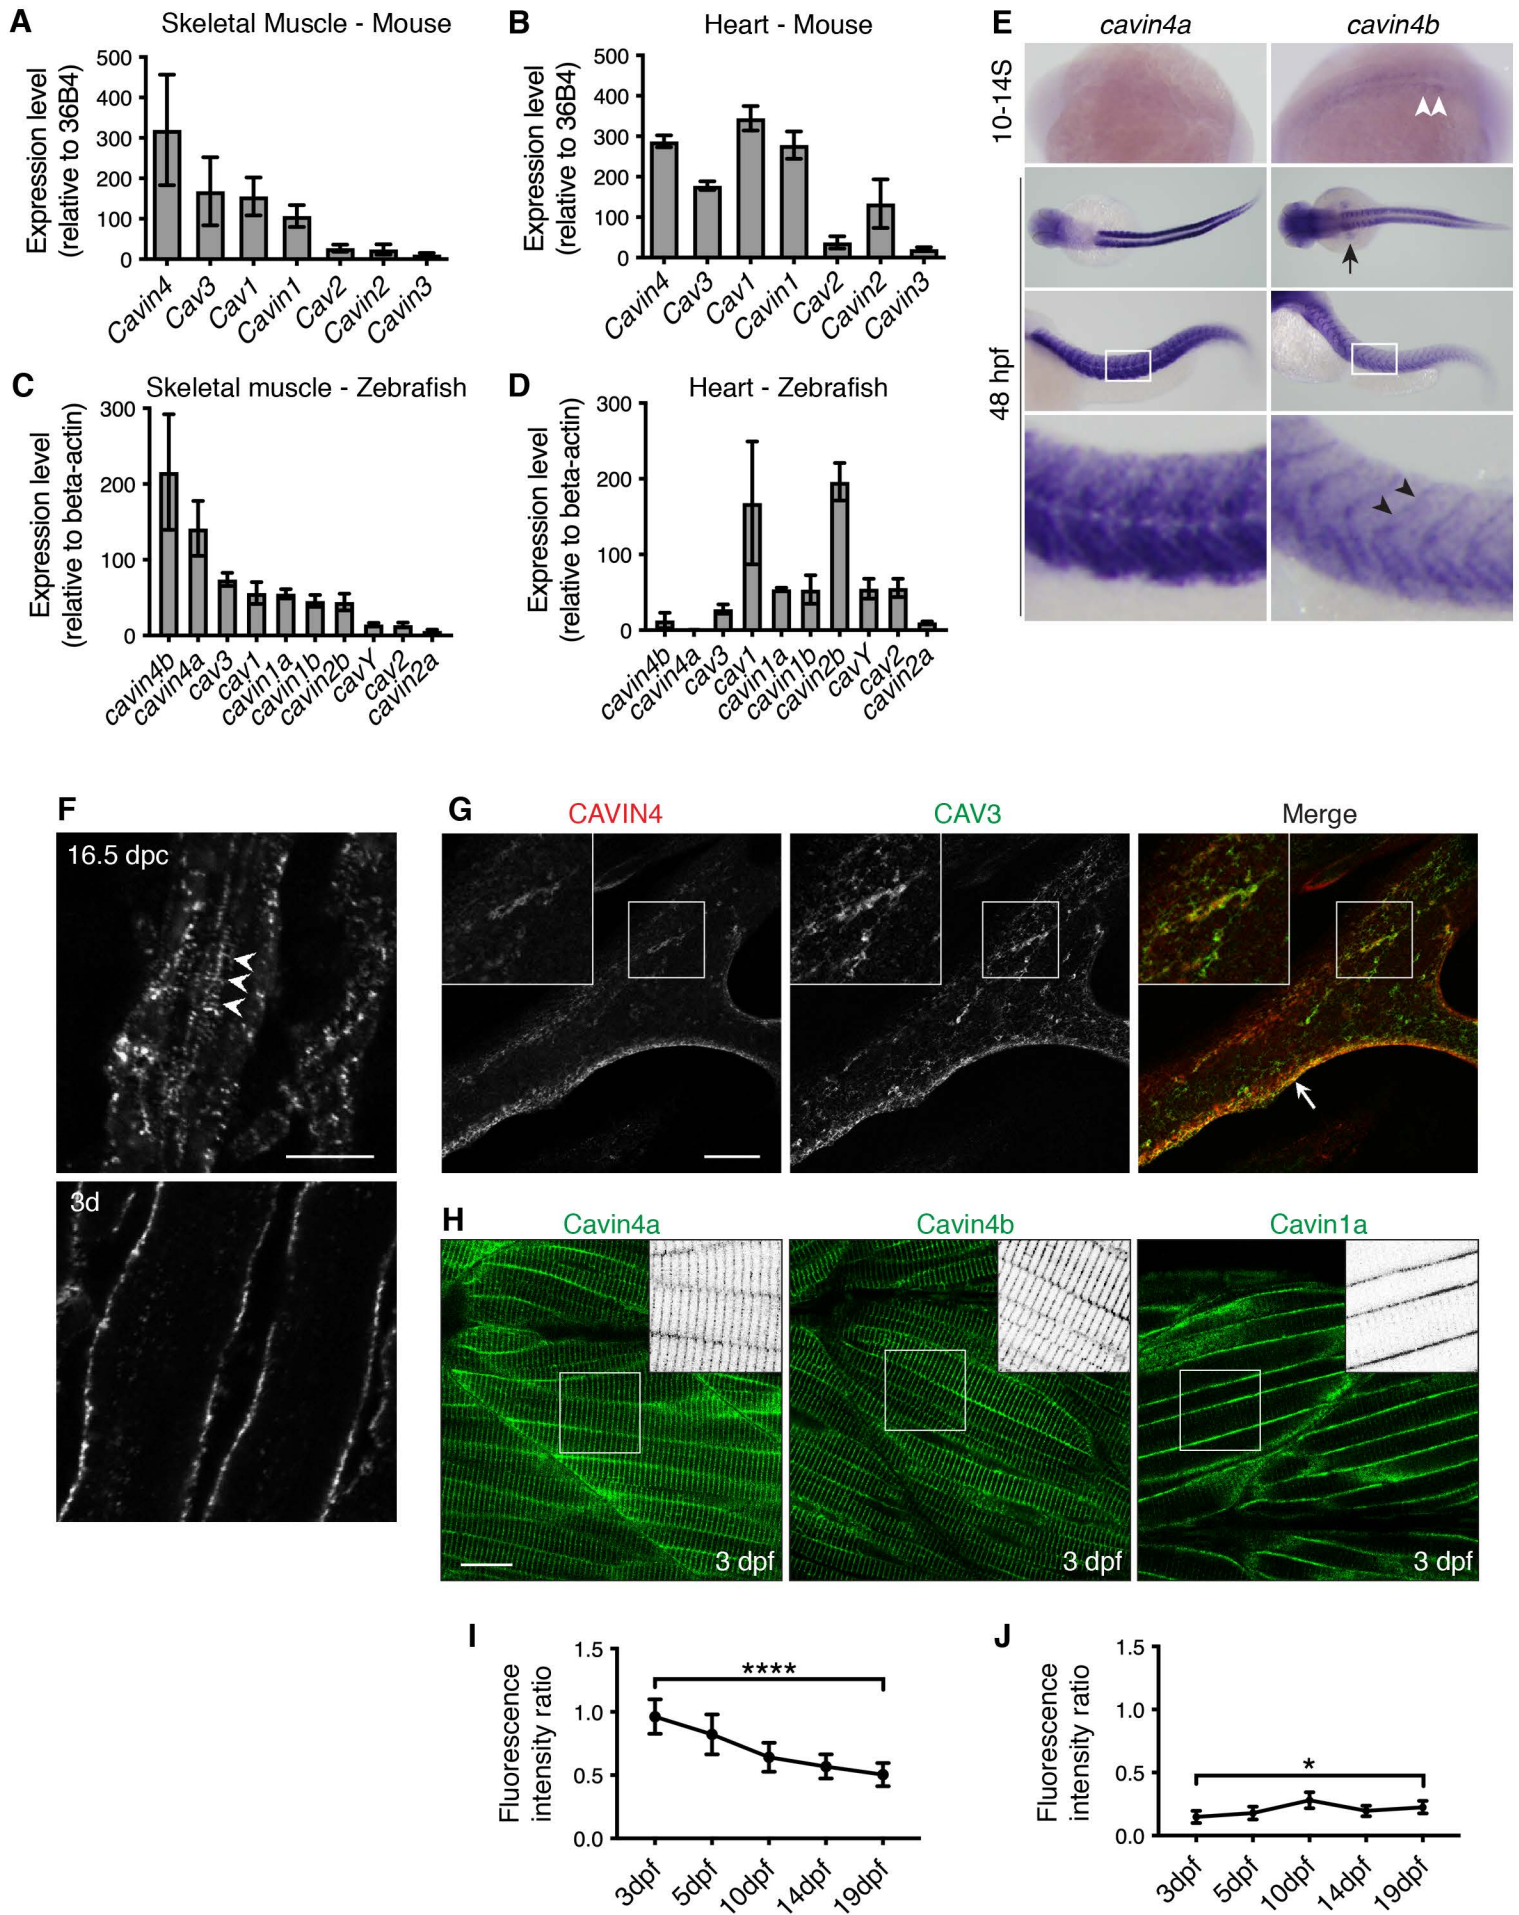



## Lo et al Figure 2

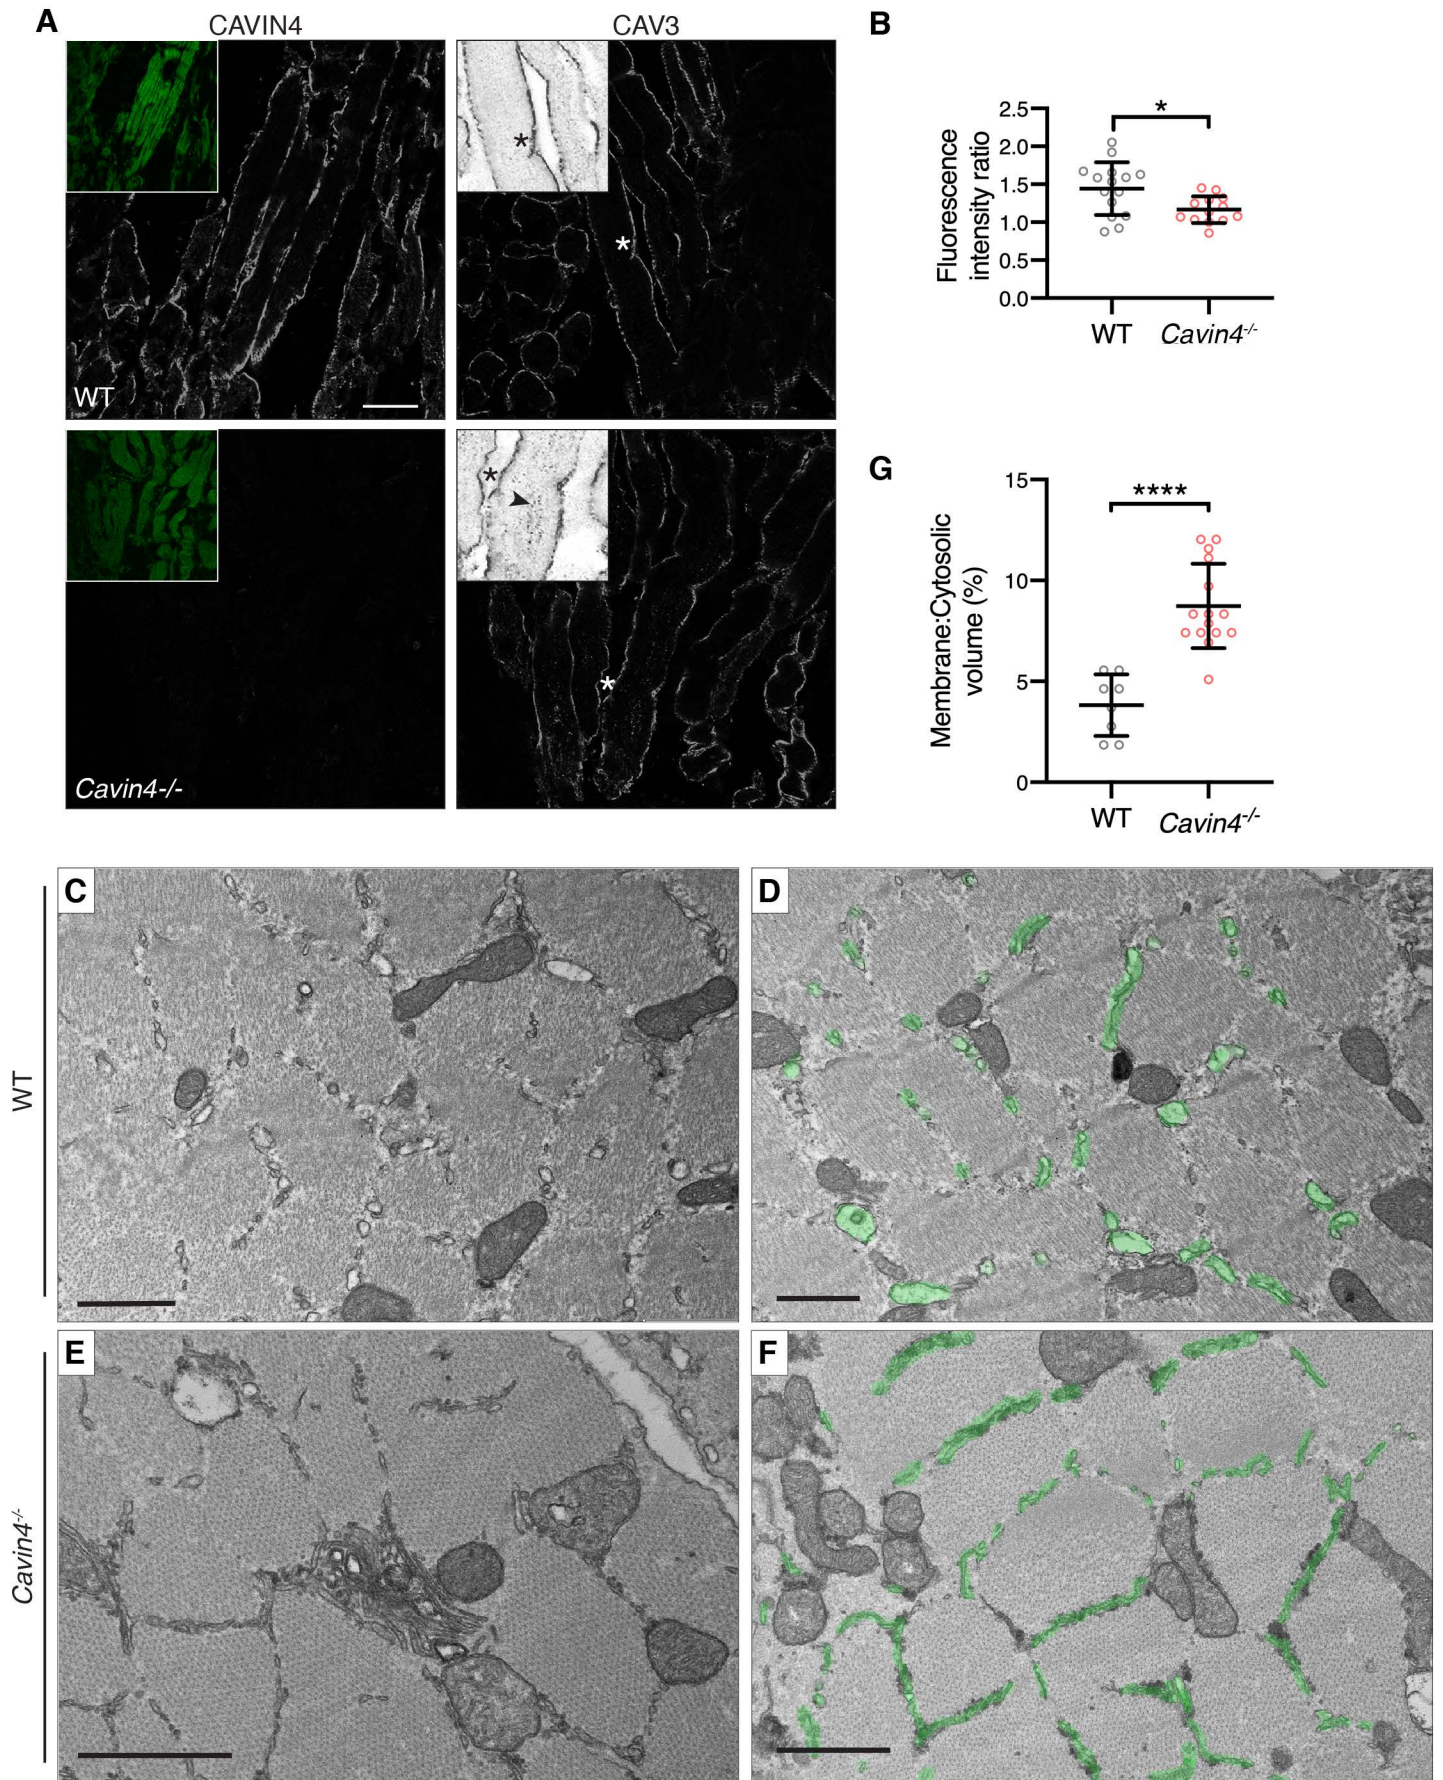



### Lo et al Figure 3

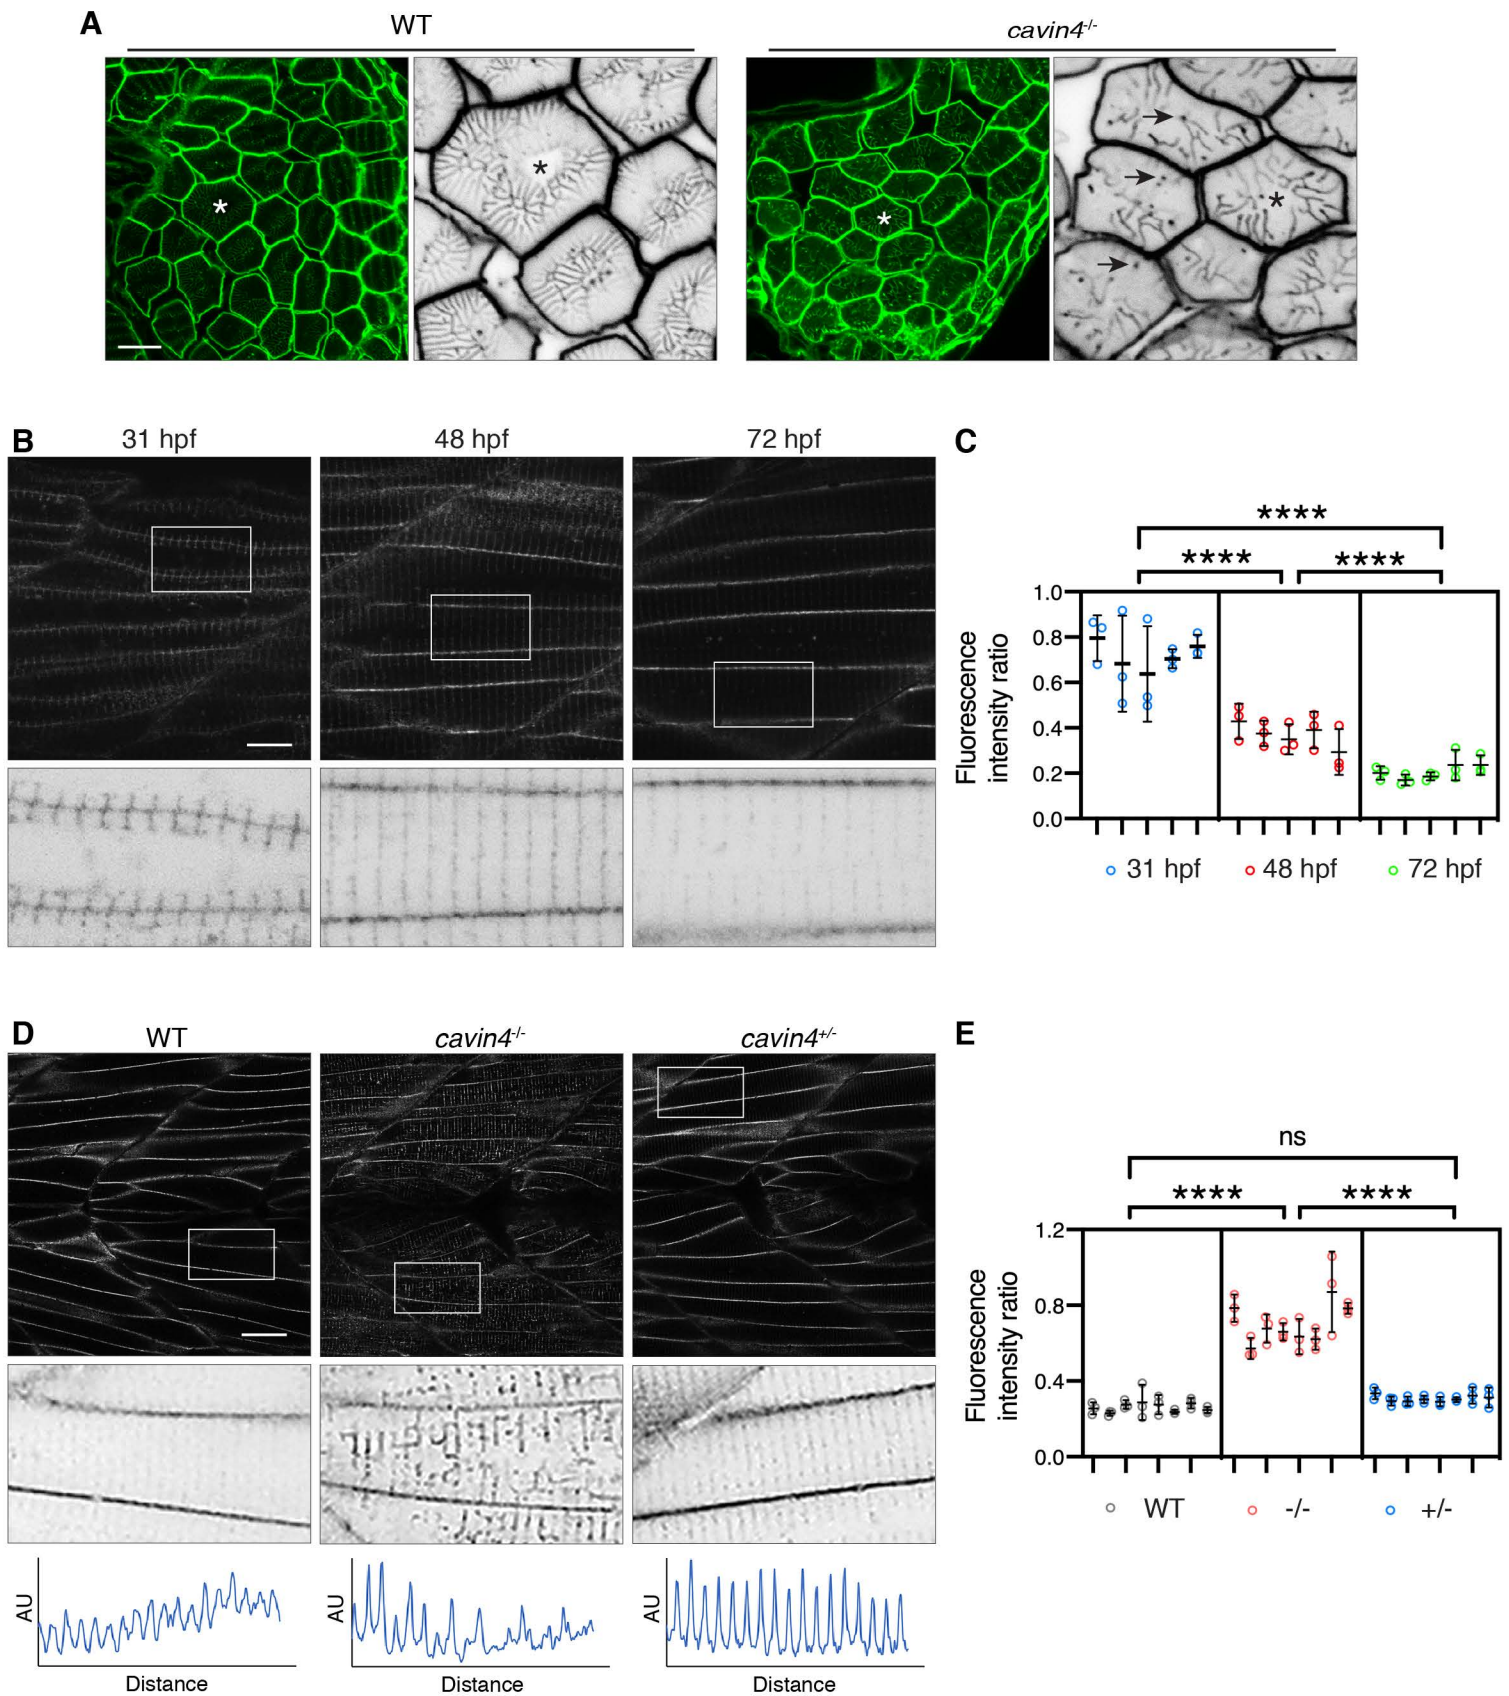



# Lo et al Figure 4

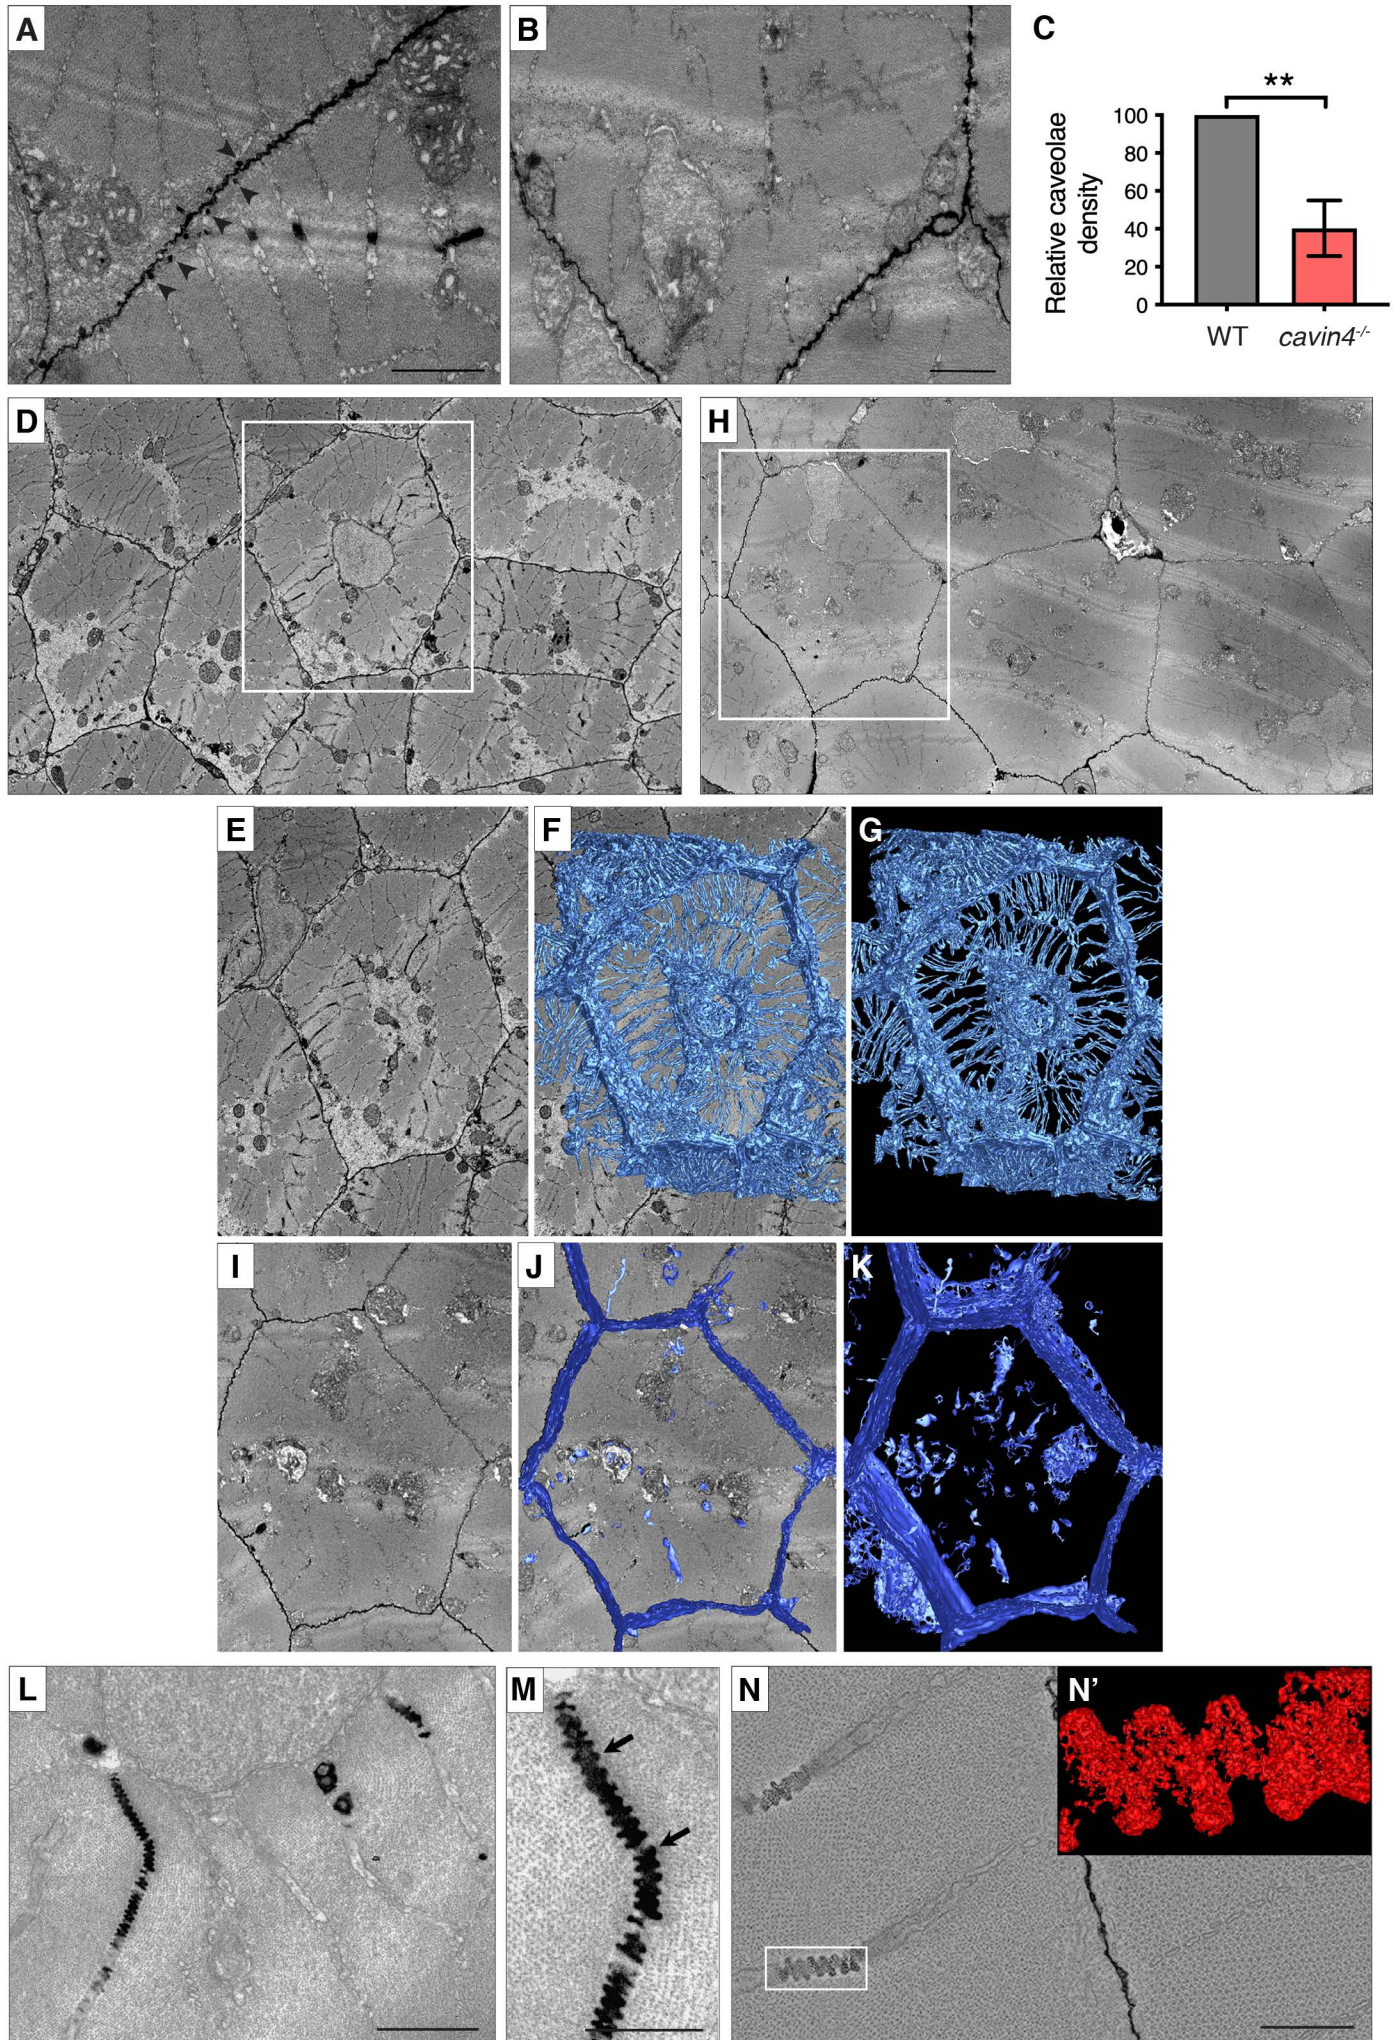



# Lo et al Figure 5

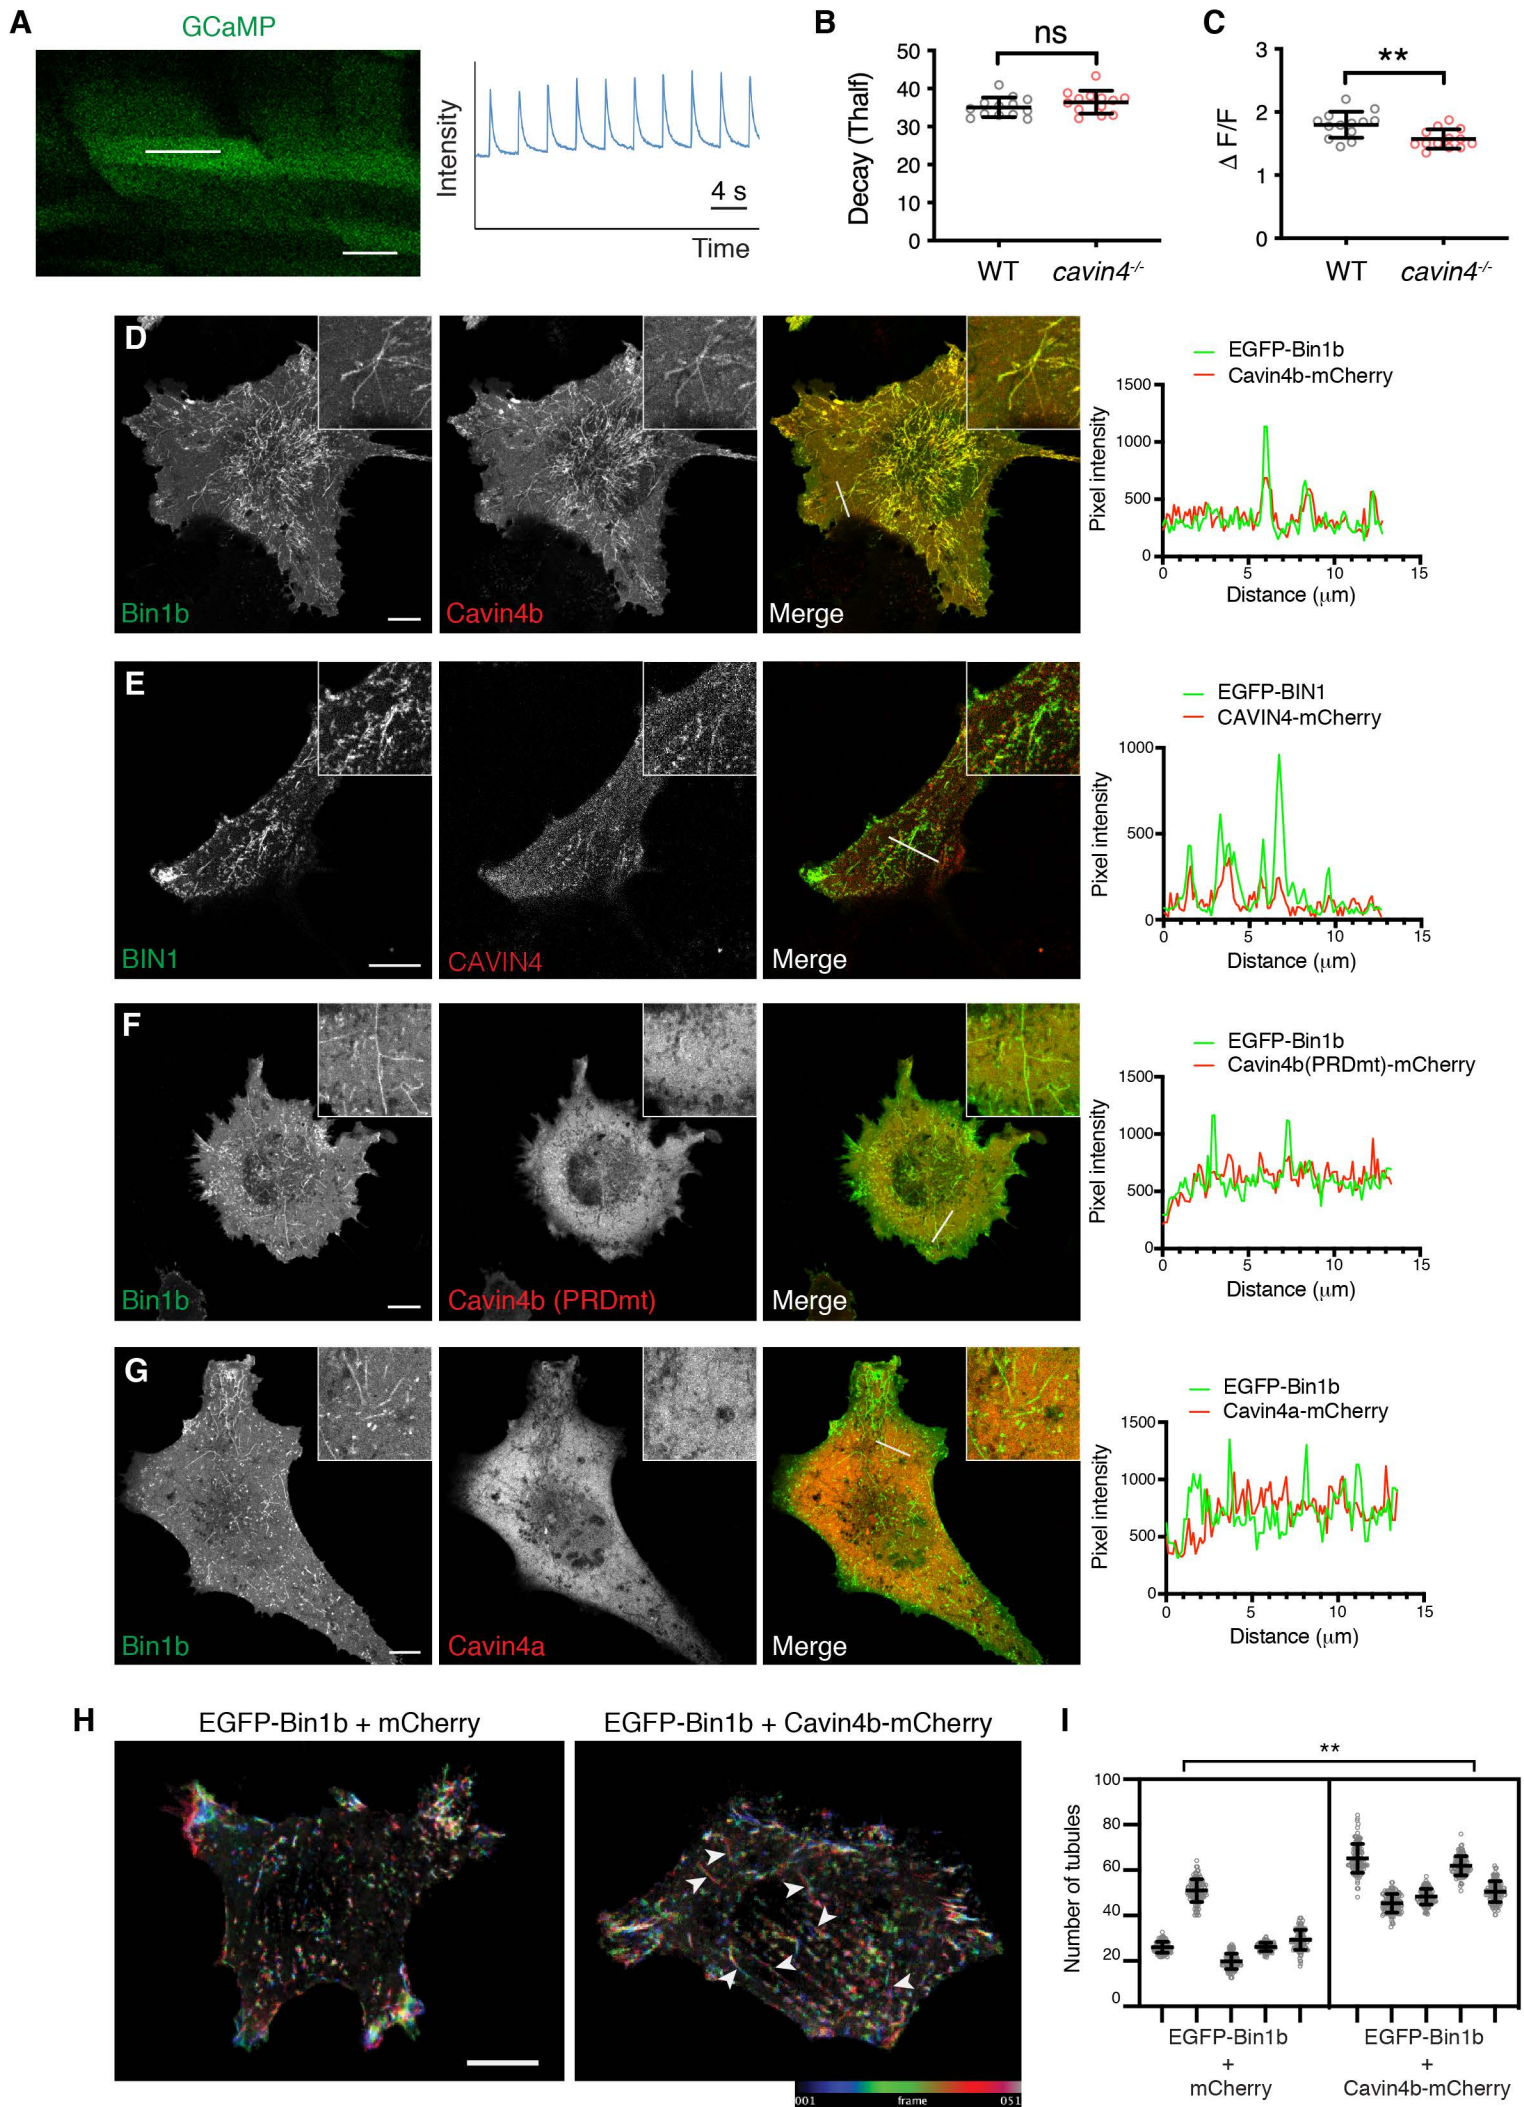

## Lo et al Figure 6

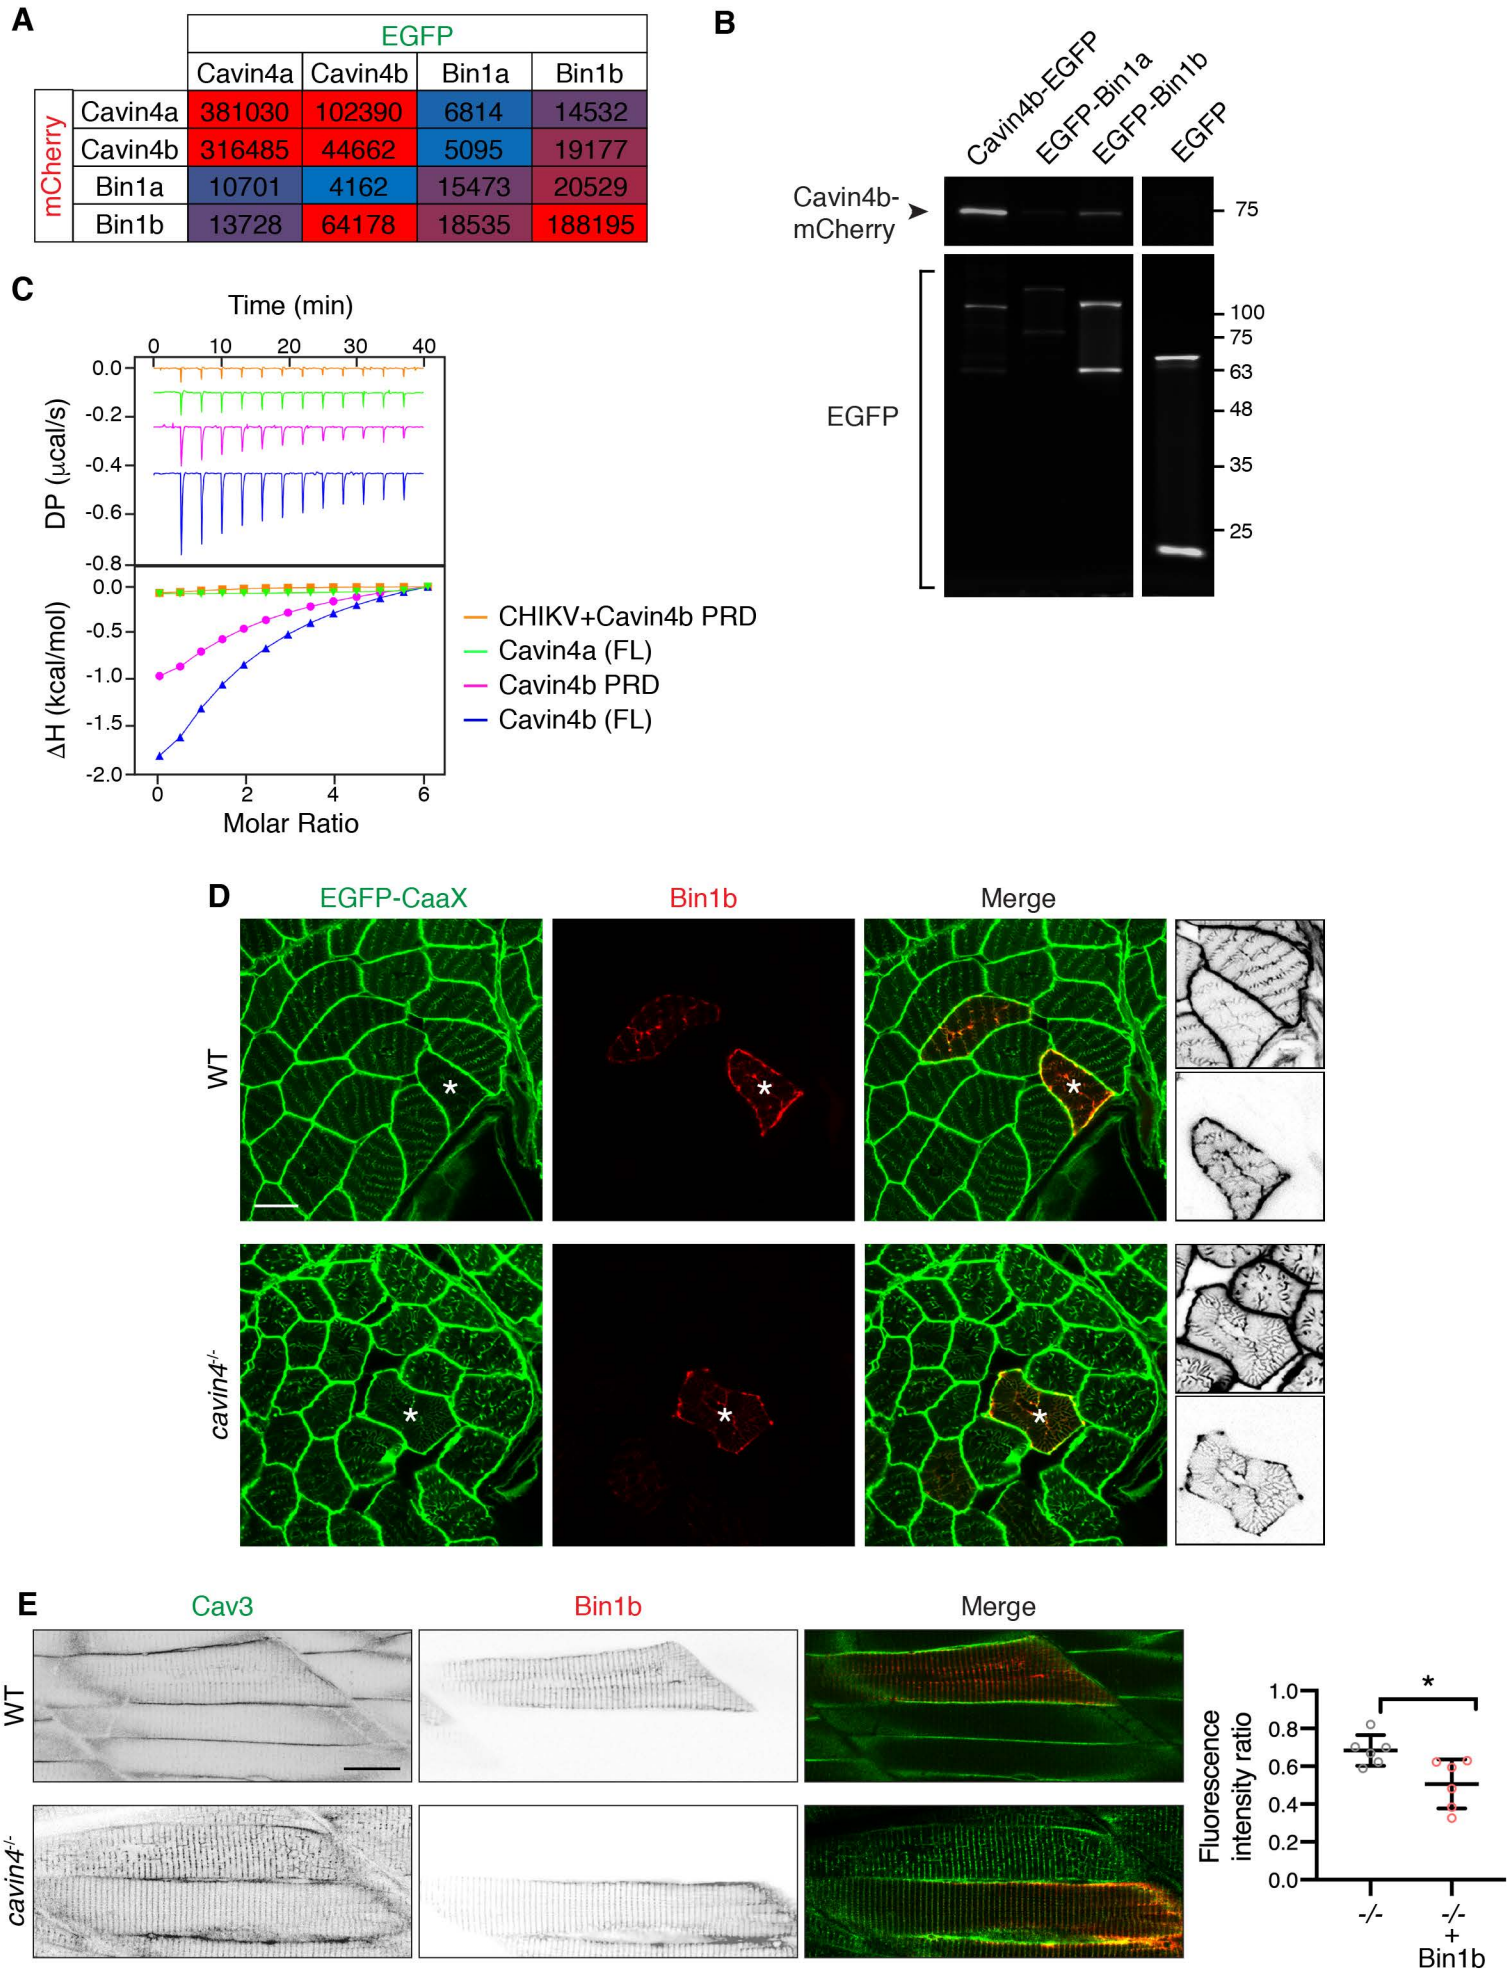



# Lo et al Figure 7

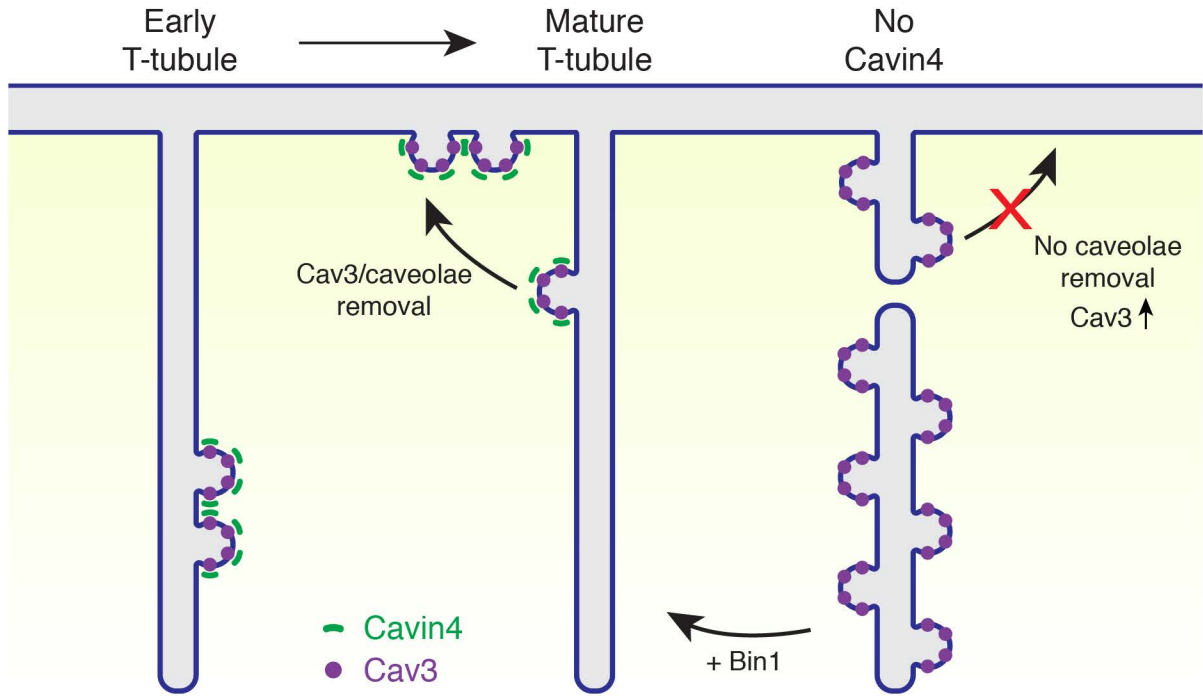

681 **Supplemental Figure Legends**

682 **Figure S1. Characterization of Cavin4 expression in the zebrafish**

683 **(A)** Western analysis of Cavin4b expression in 72 hpf WT and *cavin4b*<sup>-/-</sup> embryos, and  
684 adult zebrafish heart tissue.  $\beta$ -dystroglycan ( $\beta$ DG) is shown as a protein loading  
685 control. Note: image is shown as a merge of chemiluminescent blot and colorimetric  
686 image. 15 $\mu$ g of lysate was loaded for each sample. Molecular weight (in parentheses)  
687 shown in kDa. **(B)** Wholemount ISH of *cavin4a* and *cavin4b* in 24 hpf WT zebrafish  
688 embryos. All images anterior to left in both dorsal and lateral view. Note lack of  
689 notochord staining in dorsal view. **(C)** Wholemount ISH of *cavin4a* and *cavin4b* in 24  
690 hpf, 5 dpf and 7 dpf WT zebrafish embryos highlighting a lack of *cavin4a* and *cavin4b*  
691 expression in the heart (arrows indicate positive control staining of *anp*, a cardiac-  
692 specific marker). **(D)** Confocal images showing subcellular localization of Clover-  
693 tagged Cavin4a and Cavin1a at different developmental stages (3, 5, 10, 14 and 19  
694 dpf; left to right). Bar, 20  $\mu$ m. Table shows pairwise comparison of statistical  
695 differences observed for T-tubule:sarcolemmal intensity ratios over the range of  
696 developmental stages (one-way ANOVA with multiple-comparison Tukey's test;  
697 \*P $\leq$ 0.05, \*\*P $\leq$ 0.01 \*\*\*P $\leq$ 0.001; \*\*\*\*P $\leq$ 0.0001). ns, not significant.

698 **Figure S2. Characterization of *Cavin4*<sup>-/-</sup> mouse skeletal muscle and C2C12**  
699 **myotubes.**

700 **(A)** CAVIN4 immunostaining (with Phalloidin-Alexa488 counterstain, inset) in 3 day  
701 old WT and *Cavin4*<sup>-/-</sup> mouse skeletal muscle. *Cavin4*<sup>-/-</sup> #2 and #3 were used for  
702 analysis shown in Figure 2. Bar, 10  $\mu$ m. **(B)** Western analysis of CAVIN4 and BIN1 in  
703 3 day old WT and *Cavin4*<sup>-/-</sup> mouse skeletal muscle (n=3 each). Total sarcomeric actin  
704 ( $\alpha$ ACTIN) shown as a muscle-specific loading control. 25 $\mu$ g lysate loaded for each  
705 sample. Molecular weight (in parentheses) is in kDa. **(C-D)** qRT-PCR of *Cavin4* and  
706 *Bin1* expression in WT and *Cavin4*<sup>-/-</sup> mouse skeletal muscle. Quantitation relative to

707 36B4 (mean±SD; n=3 each WT and *Cavin4*<sup>-/-</sup>, performed in triplicate). ns, not  
708 significant. **(E)** Max projection of CAVIN4 and CAV3 localization in WT and *Cavin4*<sup>-/-</sup>  
709 C2C12 myotubes. Inset=boxed areas. Bar, 10 μm. **(F)** Western analysis of CAVIN4  
710 and BIN1 in WT and *Cavin4*<sup>-/-</sup> C2C12 myotubes (n=4 independent replicates). Total  
711 sarcomeric actin (αACTIN) shown as a muscle-specific loading control. 25μg lysate  
712 loaded for each sample. Molecular weight (in parentheses) is in kDa. **(G-H)** qRT-PCR  
713 of *Cavin4* and *Bin1* expression in WT and *Cavin4*<sup>-/-</sup> C2C12 myotubes. Quantitation  
714 relative to 36B4 (mean±SD; n=3 each of WT and *Cavin4*<sup>-/-</sup>, performed in triplicate).  
715 \*\*P≤0.01. \*\*\*P≤0.001.

716 **Figure S3. Generation and characterization of *cavin4a* and *cavin4b* zebrafish**  
717 **mutant lines.**

718 **(A)** Alignment of nucleotide and amino acid sequences for *cavin4a*<sup>uq5rp</sup> (*cavin4a*<sup>-/-</sup>) and  
719 *cavin4b*<sup>uq6rp</sup> (*cavin4b*<sup>-/-</sup>) mutant lines in comparison to WT sequences. The CRISPR-  
720 generated *cavin4a*<sup>-/-</sup> line harbors a single base pair insertion (underlined), resulting in  
721 a frameshift (truncating stop codon indicated by asterisk) within the HR1 domain of  
722 Cavin4a (arrow). Cavin4a protein domains: Disordered regions DR1 (residues 1-15),  
723 DR2 (residues 124-260) and DR3 (residues 270-C' end) shaded gray; Helical regions  
724 HR1 (residues 16-123) and HR2 (residues 160-270) shaded yellow. The *cavin4b*<sup>-/-</sup>  
725 line, identified by a TILLING mutagenesis screen, harbors a single point mutation  
726 (underlined) resulting in a nonsense mutation within the HR1 domain of Cavin4b  
727 (arrow). Cavin4b protein domains: Disordered regions DR1 (residues 1-11), DR2  
728 (residues 120-169) and DR3 (residues 256-319) shaded gray; Helical regions HR1  
729 (residues 12-119) and HR2 (residues 170-255) shaded yellow. **(B)** qRT-PCR of  
730 caveolae-associated genes in WT and *cavin4a*<sup>-/-</sup> 5 dpf embryos. Quantitation relative  
731 to *β-actin* (mean±SD; n=3 clutches WT, n=4 clutches from *cavin4a*<sup>-/-</sup>, performed in  
732 triplicate). \*\*P≤0.01 for *cavin4a* expression. Remaining comparisons were not

733 significant. **(C)** qRT-PCR of caveolae-associated genes in WT and *cavin4b*<sup>-/-</sup> 5 dpf  
734 embryos. Quantitation relative to *β-actin* (mean±SD; n=4 clutches from each,  
735 performed in triplicate). \*\*\*\*P≤0.0001 for *cavin4b* expression. Remaining comparisons  
736 were not significant. See also Figure S1A. **(D)** Embryo length (mm) for 72 hpf *cavin4a*  
737 <sup>-/-</sup> and *cavin4b*<sup>-/-</sup> zebrafish embryos in comparison to WT (mean±SD). Quantitation from  
738 n=40 WT and n=40 *cavin4a*<sup>-/-</sup> embryos from two clutches, and n=67 WT and n=50  
739 *cavin4b*<sup>-/-</sup> embryos from four and three clutches, respectively. Colored circles  
740 represent individual embryos. \*\*\*\*P≤0.0001. ns, not significant. **(E)** Mean intensity of  
741 birefringence (measured as average gray value of pixels per area) in 5 dpf *cavin4a*<sup>-/-</sup>  
742 and *cavin4b*<sup>-/-</sup> zebrafish embryos in comparison to WT (mean±SD). Quantitation from  
743 n=40 WT and n=39 *cavin4a*<sup>-/-</sup> embryos from two clutches, and n=52 WT and n=52  
744 *cavin4b*<sup>-/-</sup> embryos from four clutches each. Colored circles represent individual  
745 embryos. \*\*\*\*P≤0.0001. ns, not significant. **(F-I)** Cav3-EGFP localization in skeletal  
746 muscle fibers of 4 dpf WT (F, H) *cavin4a*<sup>-/-</sup> (G) and *cavin4b*<sup>-/-</sup> (I) embryos. Cav3-EGFP  
747 positive embryos were generated from homozygote x heterozygote crosses and  
748 genotyping was performed on embryos post-imaging. Area highlighted by the asterisk  
749 is magnified in the bottom panel (shown as inverted images, F'-I'). Bar, 10 μm. **(J-K)**  
750 Ratio of T-tubule:sarcolemmal CAV3-EGFP fluorescence intensity in *cavin4a*<sup>-/-</sup> (J) and  
751 *cavin4b*<sup>-/-</sup> muscle fibers (K), in comparison to WT (mean±SD; \*\*\*\*P≤0.0001).  
752 Quantitation was performed on muscle fibers from n=12 WT and n=11 *cavin4a*<sup>-/-</sup>  
753 embryos from 2 independent clutches and from n=20 WT and n=19 *cavin4b*<sup>-/-</sup> embryos  
754 from 3 independent clutches. Colored circles represent individual embryos.

755 **Figure S4. A loss of Cavin4b leads to reduced caveolae density and impaired**  
756 **swimming ability in zebrafish muscle.**

757 **(A)** Wholemout ISH of *cavin4a* and *cavin4b* in WT and *cavin4b*<sup>-/-</sup> 24 hpf zebrafish  
758 embryos, showing loss of *cavin4b* signal in *cavin4b*<sup>-/-</sup> embryos. Images shown in

759 dorsal and lateral view (upper and lower panel, respectively). All images anterior to  
760 left. **(B-D)** Ultrastructural analysis of 5 dpf WT (B) and *cavin4b*<sup>-/-</sup> (C-D) zebrafish  
761 embryos. Normal sarcomeric structure and T-system (arrows, B and D) was observed  
762 in WT and *cavin4b*<sup>-/-</sup> embryos. An abundance of caveolae was observed in WT muscle  
763 (arrowheads, B), but relatively few caveolae were observed in *cavin4b*<sup>-/-</sup> muscle  
764 (arrowhead, D). Bars: B and D, 500 nm; C, 1  $\mu$ m. **(E)** Relative caveolae density was  
765  $43.7\pm 15.0$  % in 5 dpf *cavin4b*<sup>-/-</sup> muscle, in comparison to WT muscle (mean $\pm$ SD;  
766  $**P\leq 0.01$ ). n=3 each of WT and *cavin4b*<sup>-/-</sup> fibers. **(F)** Cav3 immunofluorescence (with  
767 DAPI counterstain) in isolated muscle fibers from 4 dpf WT and *cavin4b*<sup>-/-</sup> embryos.  
768 Muscle fibers are highlighted with a dashed line. Images to right of panel represent  
769 higher magnification of boxed area. Bars, 30  $\mu$ m. **(G)** Corrected total cell fluorescence  
770 (CTCF) of 4 dpf WT muscle fibers (86 fibers from 4 clutches) and 4 dpf *cavin4b*<sup>-/-</sup> (65  
771 fibers from 4 clutches) was  $9574\pm 5109$  and  $4743\pm 1235$  AUF (arbitrary unit of  
772 fluorescence), respectively (mean $\pm$ SD; ns, not significant). CTCF values were  
773 calculated from subtracting mean fluorescence of background signal from the  
774 integrated density of a whole muscle fiber. **(H-I)** 7 dpf WT, *cavin4b*<sup>+/-</sup> and *cavin4b*<sup>-/-</sup>  
775 zebrafish embryos were placed in a 24-well plate and total swimming distance (mm)  
776 over 10 min under light was recorded (mean $\pm$ SD; one-way ANOVA). H and I represent  
777 two independent experiments. *Cavin4b*<sup>+/-</sup> embryos were generated from WT x *cavin4b*  
778 <sup>-/-</sup> crosses. Colored circles represent individual embryos (n=24 each).  $*P\leq 0.05$ ,  
779  $**P\leq 0.01$ . ns, not significant. **(J)** Critical swimming speed (Ucrit) was  $25.5\pm 3.4$  and  
780  $20.4\pm 3.7$  body lengths per second (BL/s) in WT and *cavin4b*<sup>-/-</sup> adult zebrafish,  
781 respectively (mean $\pm$ SD;  $*P\leq 0.05$ ). Colored circles represent individual fish (n=6 each).  
782 **Figure S5. T-tubule dysmorphology in *cavin4*<sup>-/-</sup> zebrafish muscle.**  
783 **(A)** General morphology of *cavin4*<sup>-/-</sup> zebrafish embryo at 72 hpf in comparison to a WT  
784 embryo. Bar, 500  $\mu$ m. **(B)** Transverse section of a 5 dpf *cavin4*<sup>-/-</sup> embryo with a more

785 severe EGFP-CaaX localization pattern. Asterisk indicates corresponding muscle fiber  
786 in higher magnification (shown as an inverted image) on right. Bar, 10  $\mu\text{m}$ . **(C)**  
787 Transverse sections of 10 dpf EGFP-CaaX expressing WT and *cavin4*<sup>-/-</sup> embryos.  
788 Asterisk indicates corresponding muscle fiber in higher magnification (shown as an  
789 inverted image) on right. Bar, 10  $\mu\text{m}$ . **(D)** Transverse sections of 30 dpf EGFP-CaaX  
790 expressing WT, *cavin4*<sup>+/-</sup> *cavin4*<sup>-/-</sup> embryos. Asterisk indicates corresponding muscle  
791 fiber in higher magnification (shown as an inverted image) in middle panel. Images of  
792 muscle fibres in longitudinal orientation are shown as inverted images in far right  
793 panel; arrowheads indicate longitudinal tubules. *Cavin4*<sup>+/-</sup> embryos are clutchmates of  
794 *cavin4*<sup>-/-</sup> embryos. Bar, 20  $\mu\text{m}$ .

795 **Figure S6. An interaction between Bin1b and Cavin4b contributes to tubule**  
796 **formation**

797 **(A-B)** Ultrastructural analysis of 5 dpf WT (A) and *cavin4*<sup>-/-</sup> (B) zebrafish embryos.  
798 Arrowheads indicate caveolae in WT embryo. Bars, 1  $\mu\text{m}$ . **(C-D)** BHK cells co-  
799 transfected with: EGFP-SNX8/Cavin4b-mCherry (C, n=5 cells imaged) or EGFP-  
800 Bin1b/mCherry (D, n=3 cells imaged each in 5 independent experiments).  
801 Colocalization of each fluorophore was analyzed by a line scan (as indicated) showing  
802 pixel intensity over the line distance (far right panel). Inset=magnification of line scan  
803 area. Bars, 10  $\mu\text{m}$ . **(E-F)** Scatter plot quantitation of tubule area (E) and average  
804 Feret's diameter (F) of Bin1b-positive tubules in the presence of Cavin4b-mCherry  
805 compared to mCherry reporter only during live cell imaging over 6 min (n=5 cells  
806 analyzed). Tubule area was normalized to cell size. For E: mean $\pm$ SD, nested t-test,  
807 area normalized to cell size. For F: mean $\pm$ SD, unpaired t-test. \*P $\leq$ 0.05, \*\*P $\leq$ 0.01. **(G)**  
808 Uncropped gels from Figure 6B (shown as a multichannel image). Cavin4b-mCherry  
809 was co-expressed with Cavin4b-EGFP (positive control), EGFP-Bin1a, EGFP-Bin1b  
810 or EGFP (reporter only negative control) in BHK cells. EGFP and mCherry signal was



811 detected by in-gel fluorescence after semi-denaturing PAGE. Protein in starting lysate  
812 is shown on left, pulldown using GFPtrap with a maltose binding protein tag is shown  
813 on right. Proteins in pulldown fraction appear as a doublet due to binding to maltose.  
814 M=molecular weight marker. **(H)** Schematic of zebrafish Cavin4b protein domains  
815 (disordered regions, DR; helical regions, HR). Alignment between PRD within DR3 of  
816 Cavin4b and the SH3-binding region of CHIKV is shown; proline residues are in red  
817 and positively charged amino acids are highlighted in yellow. **(I)** Direct association of  
818 Bin1b SH3 domain with CHIKV peptide as measured by ITC.

819 **Figure S7. High expression of Bin1b ameliorates the abnormal T-tubule**  
820 **morphology observed in *cavin4*<sup>-/-</sup> zebrafish muscle.**

821 Transverse sections of EGFP-CaaX expressing WT and *cavin4*<sup>-/-</sup> muscle fibers with  
822 transient overexpression of Bin1b-mkate2. Asterisks show corresponding muscle  
823 fibers; smaller panels on the far right (shown as inverted images) represent higher  
824 magnification of these fibers (top image: EGFP-CaaX, bottom image: Bin1b-mkate2).  
825 Bar, 10  $\mu$ m.

826 **Table S1.** DNA constructs

827

828

# Lo et al Figure S1

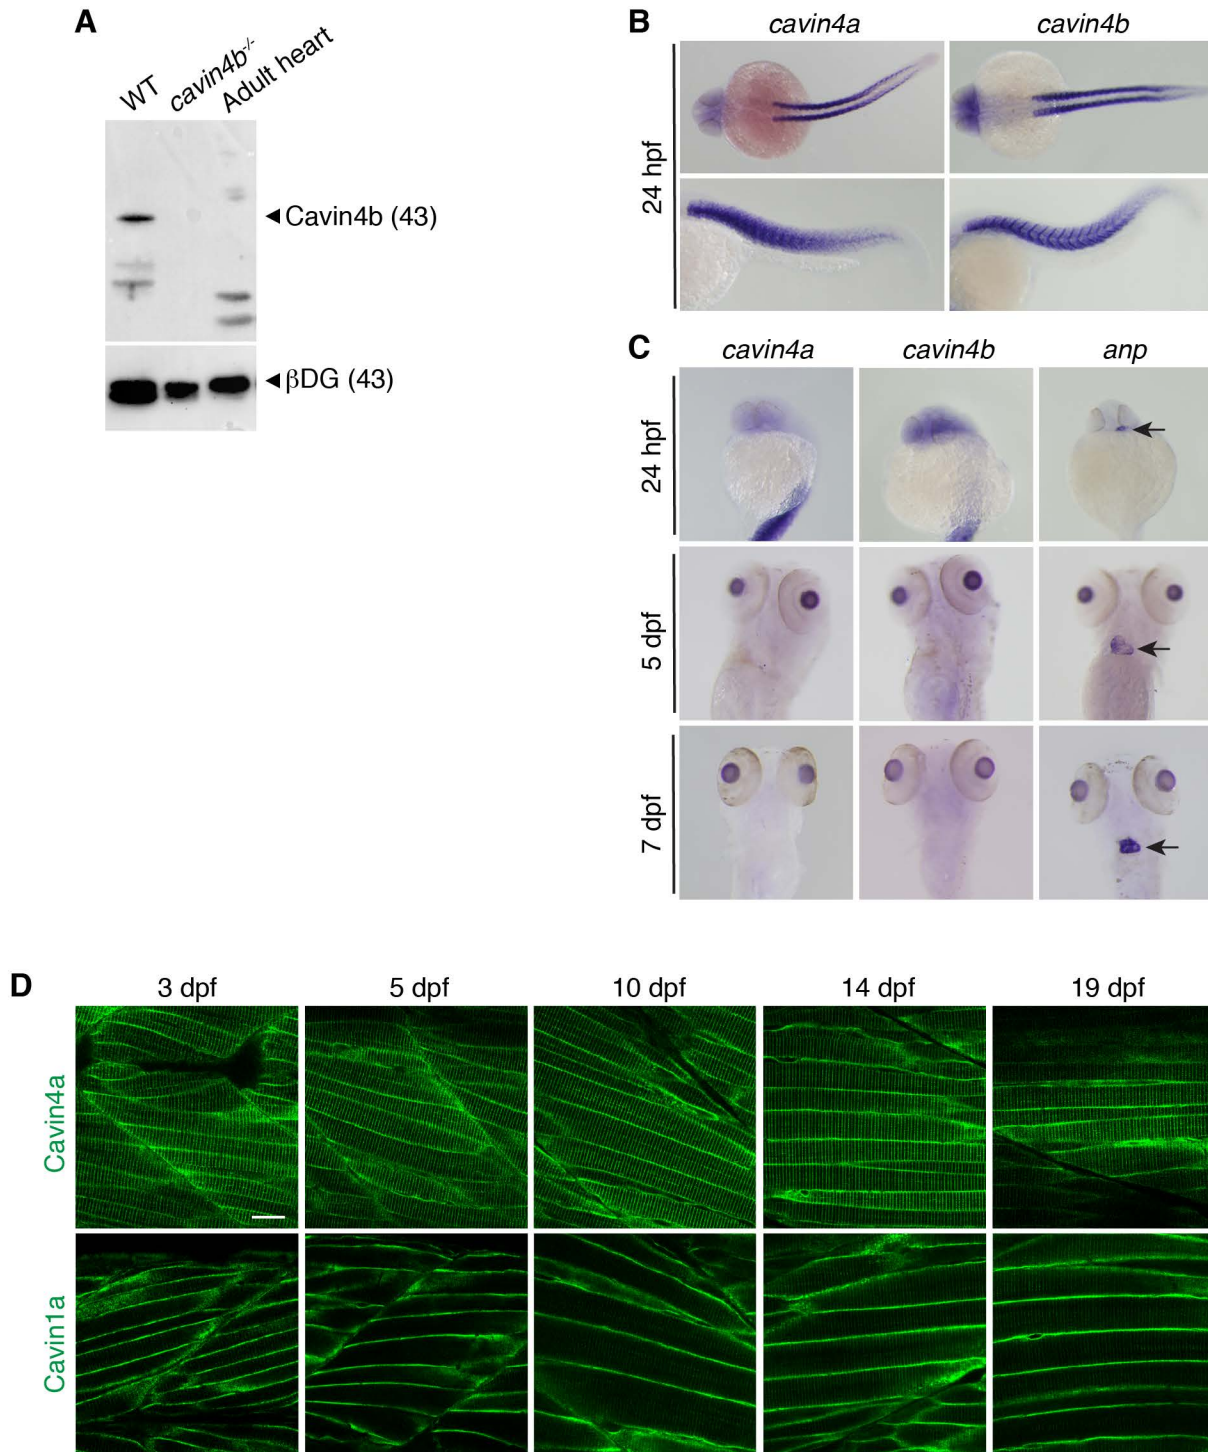

| Comparison       | Cavin4a-Clover | Cavin1a-Clover |
|------------------|----------------|----------------|
| 3 dpf vs 5 dpf   | ns             | ns             |
| 3 dpf vs 10 dpf  | ****           | ****           |
| 3 dpf vs 14 dpf  | ****           | ns             |
| 3 dpf vs 19 dpf  | ****           | *              |
| 5 dpf vs 10 dpf  | *              | **             |
| 5 dpf vs 14 dpf  | ***            | ns             |
| 5 dpf vs 19 dpf  | ****           | ns             |
| 10 dpf vs 14 dpf | ns             | *              |
| 10 dpf vs 19 dpf | ns             | ns             |
| 14 dpf vs 19 dpf | ns             | ns             |

**Lo et al Figure S2**

**A**

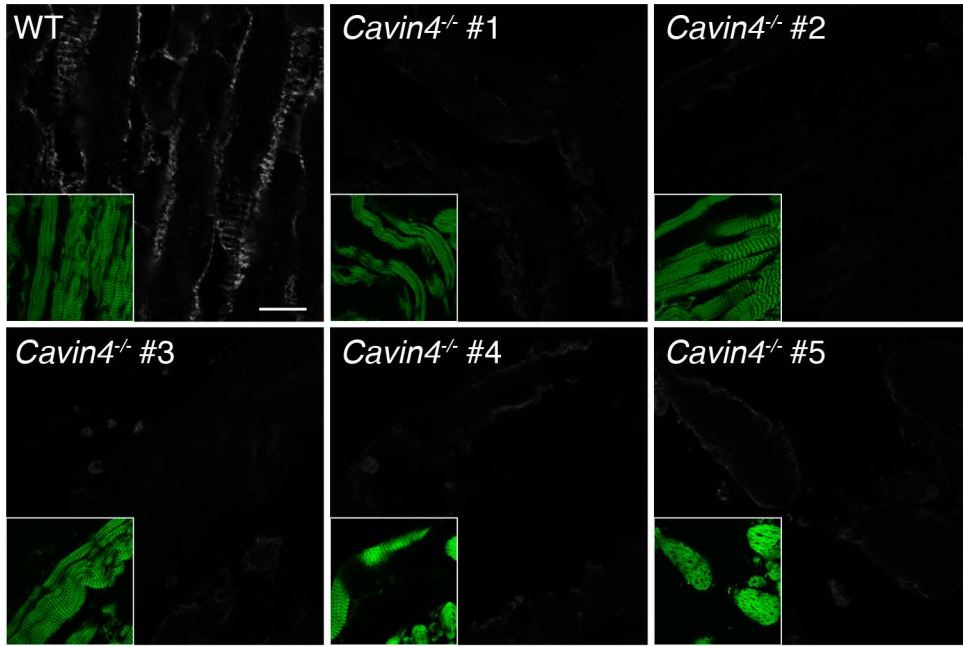

**B**

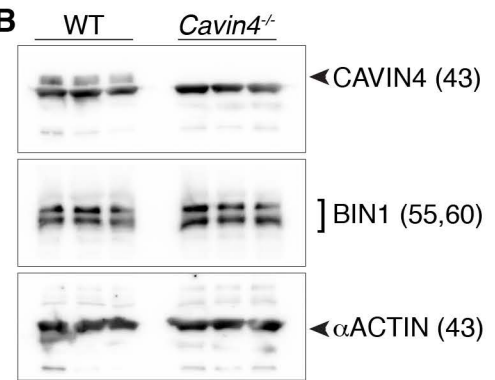

**C**

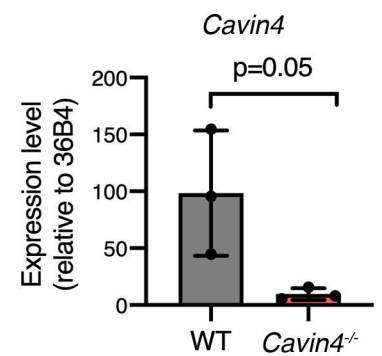

**D**

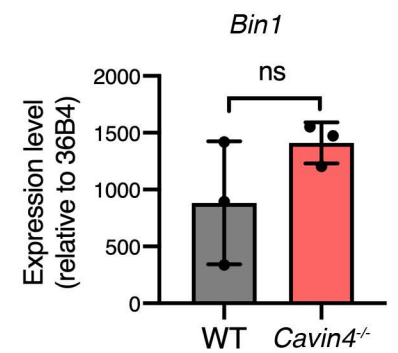

**E**

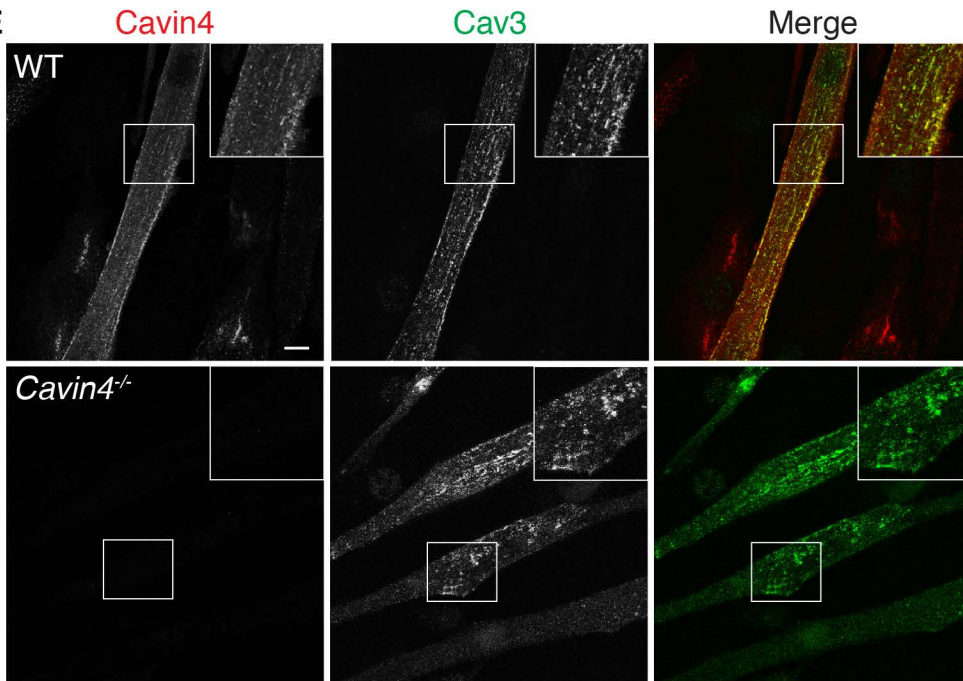

**F**

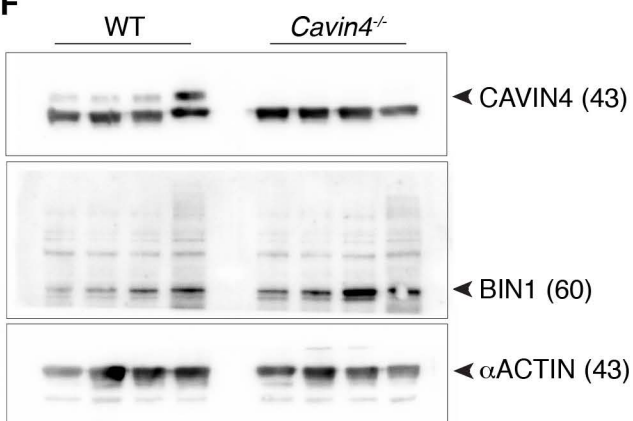

**G**

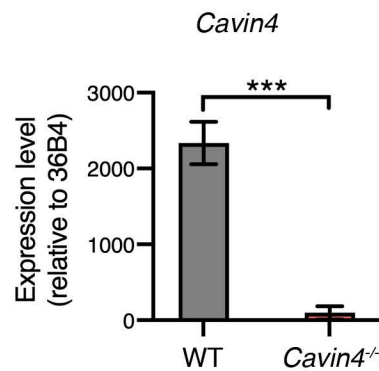

**H**

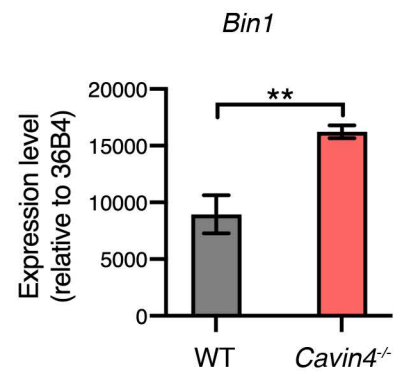



# Lo et al Figure S3

**A**

|                                                                                                                                                                                                       |                                                                                                                     |
|-------------------------------------------------------------------------------------------------------------------------------------------------------------------------------------------------------|---------------------------------------------------------------------------------------------------------------------|
| <p><b>WT (<i>cavin4a</i>)</b></p> <p>ctc gag ggc tgc gtc agc gct gtc cag tcc gag ctt ctc aaa ctg gct cgt gac<br/>                 L E G S V S A V Q S E L L K L A R D</p>                             | <p><b>WT (<i>cavin4b</i>)</b></p> <p>cag aac gtt cga<br/>                 Q N V R</p>                               |
| <p><b><i>cavin4a</i><sup>-/-</sup> (g.155insC)</b></p> <p><u>c</u>ct cga ggg ctc ggt cag cgc tgt cca gtc cga gct tct caa act ggc tgc tga<br/>                 P R G L G Q R C P V R A S Q T G S *</p> | <p><b><i>cavin4b</i><sup>-/-</sup> (g.295C&gt;T)</b></p> <p>cag aac gtt <u>t</u>ga<br/>                 Q N V *</p> |

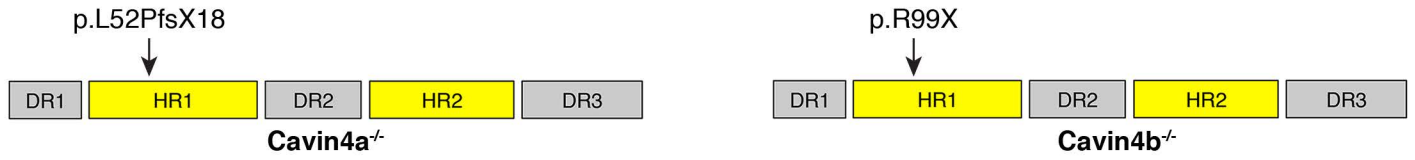

**B**

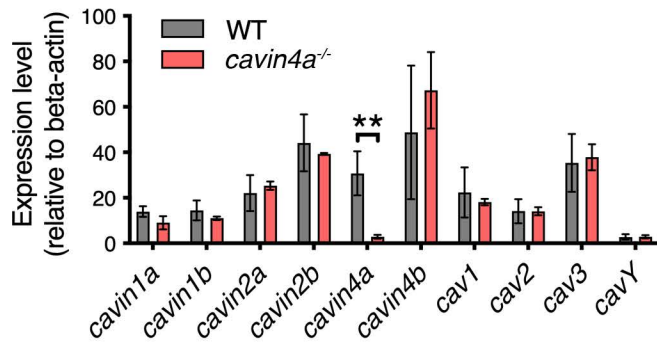

**C**

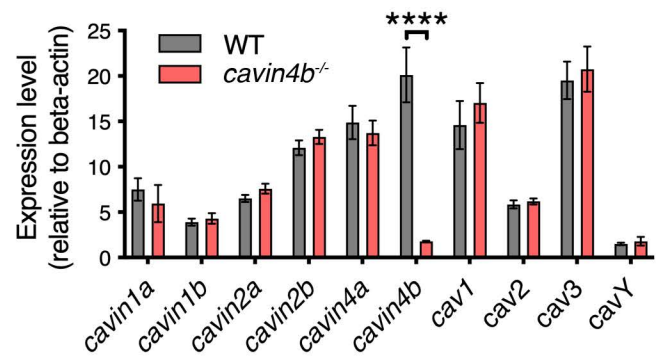

**D**

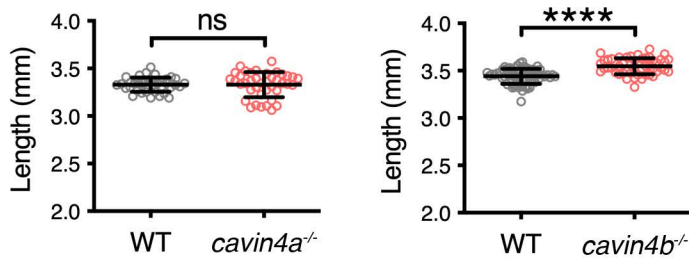

**E**

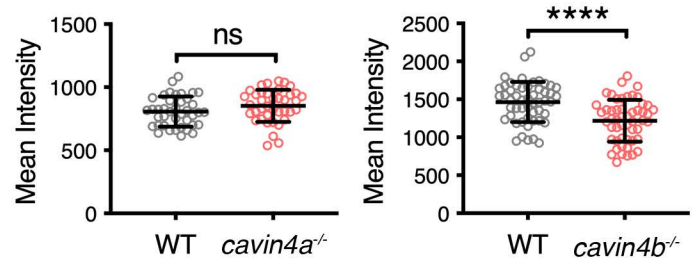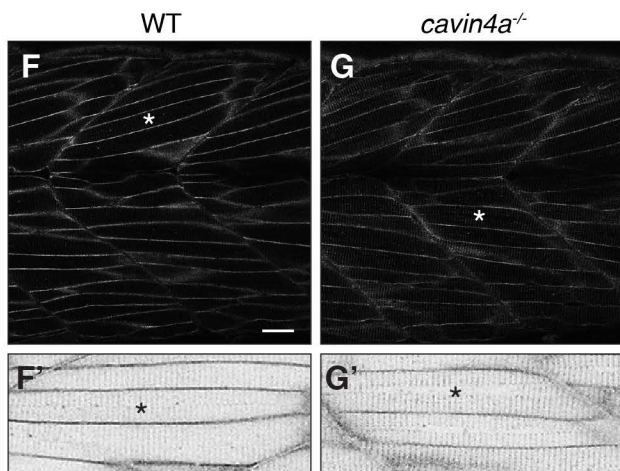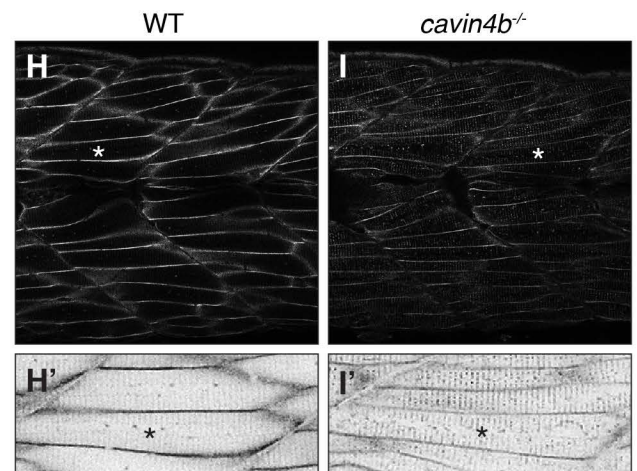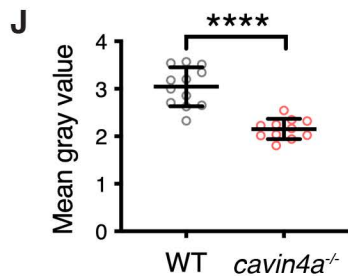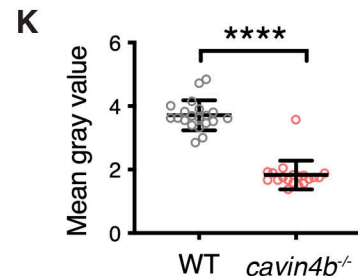

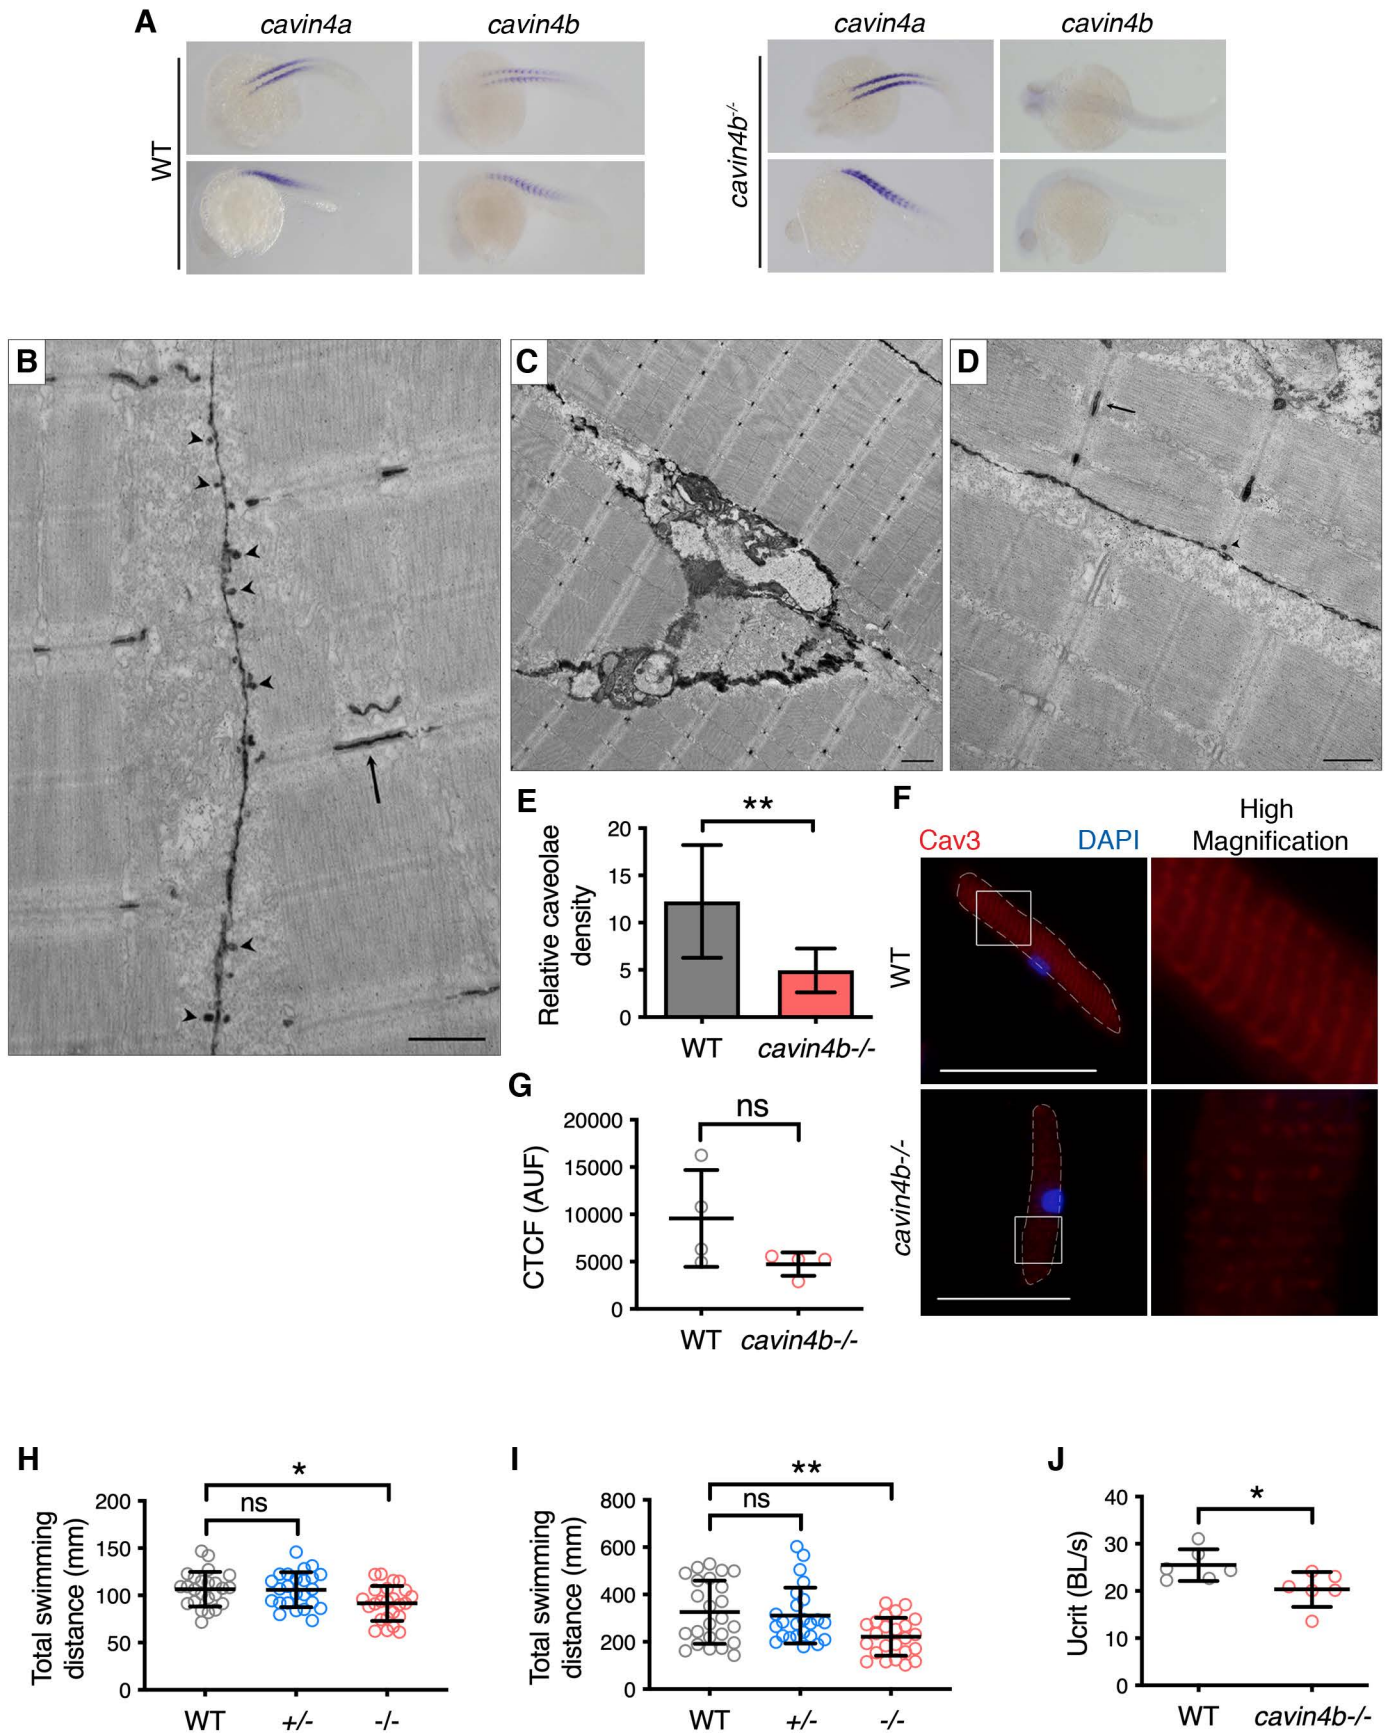



# Lo et al Figure S5

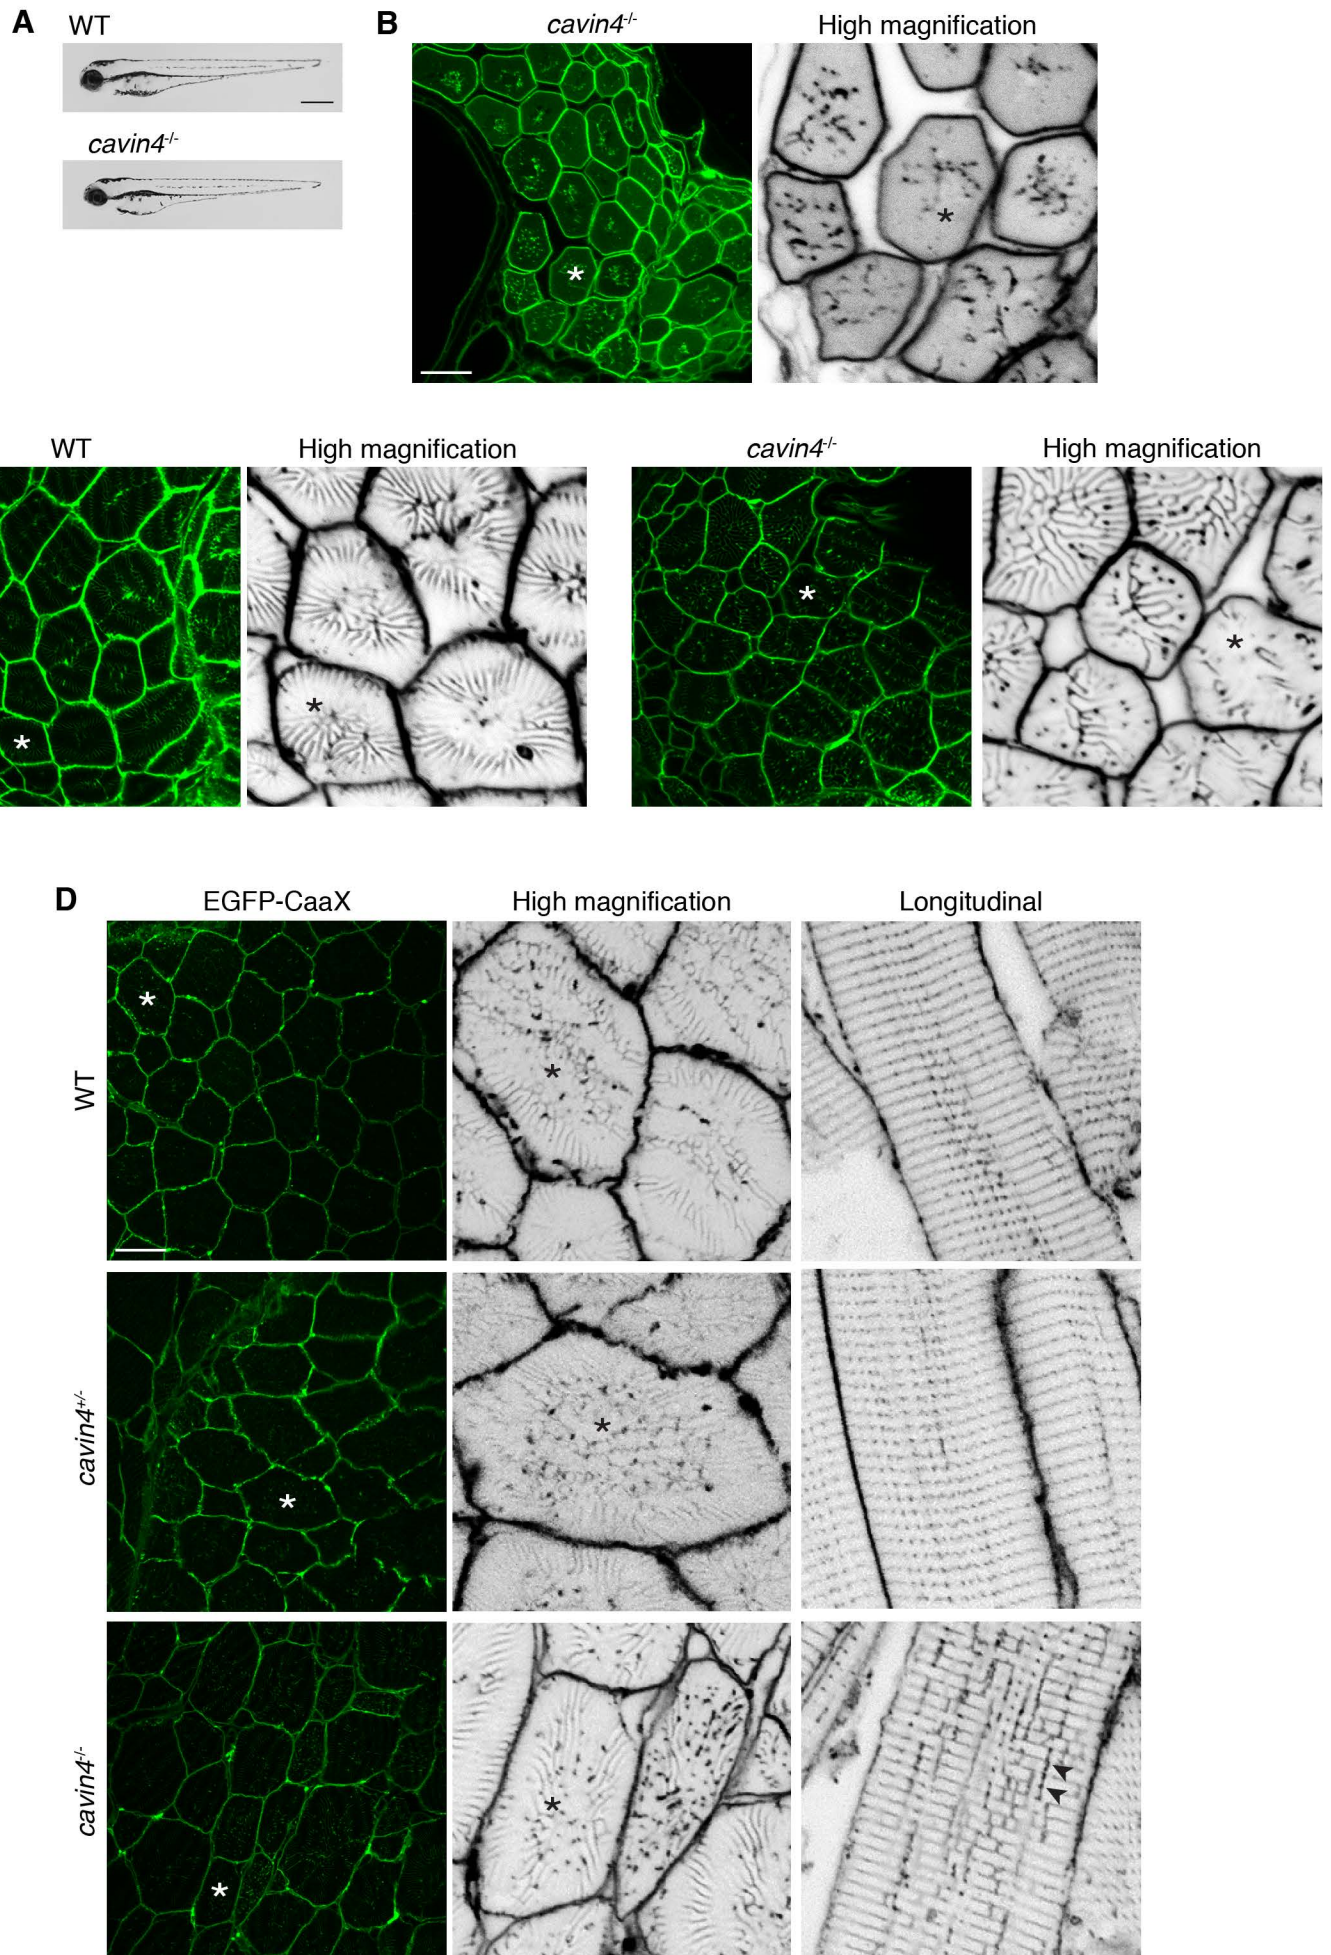



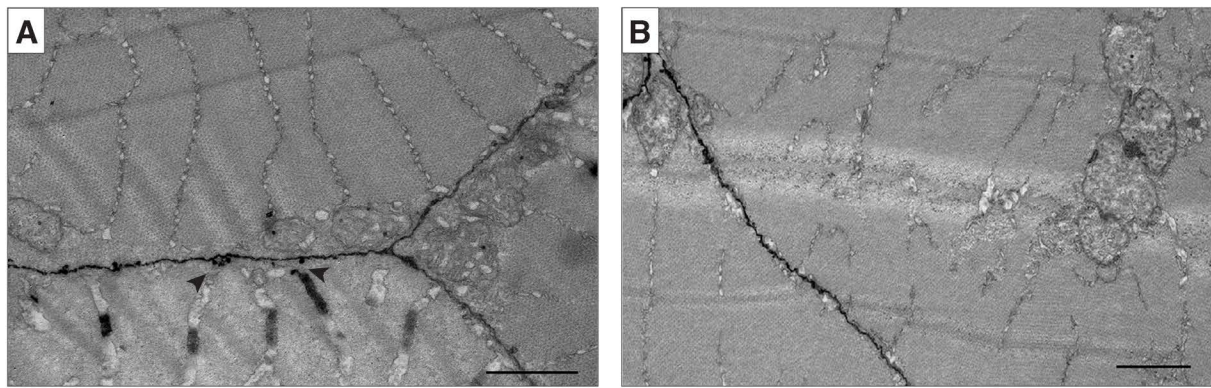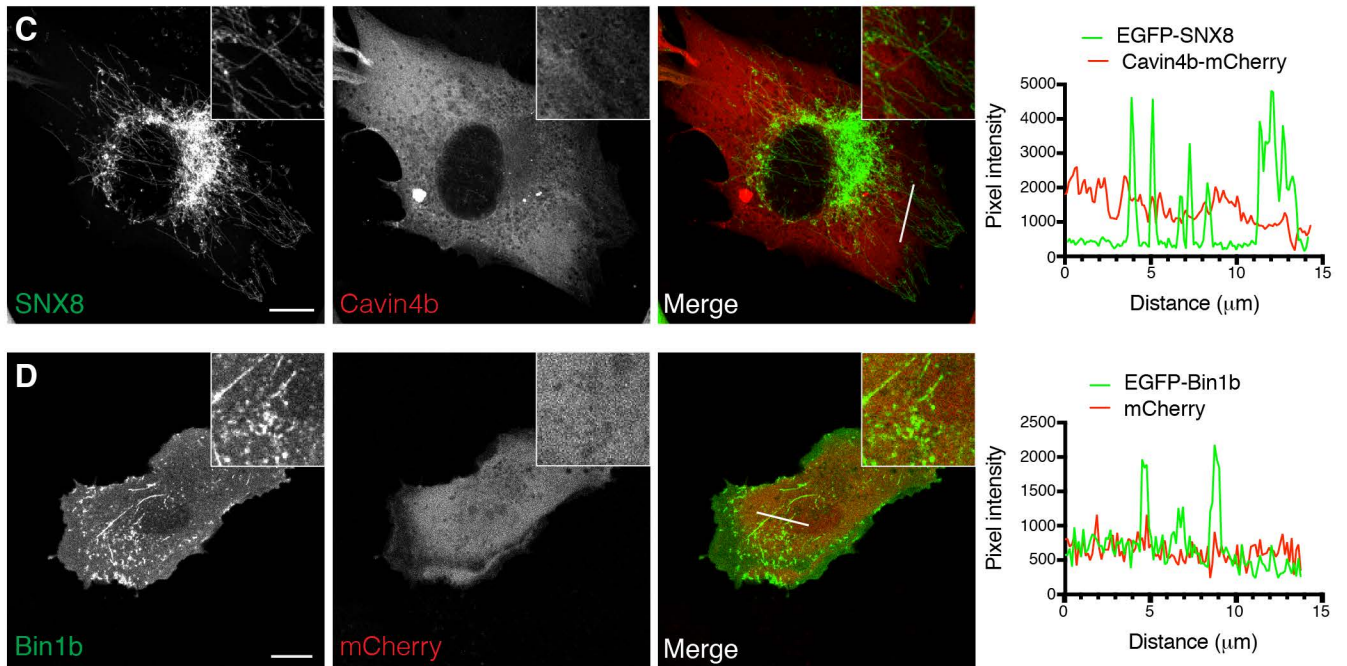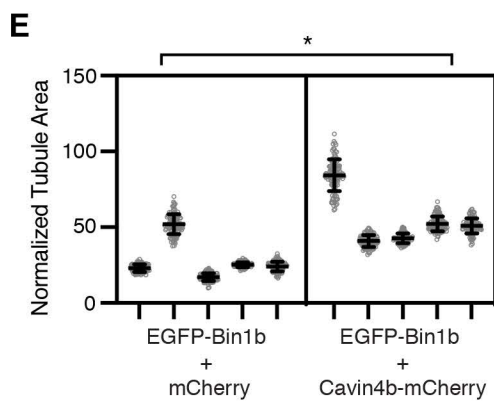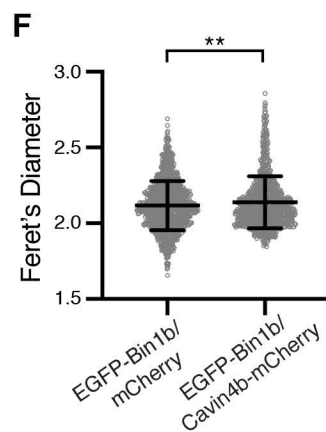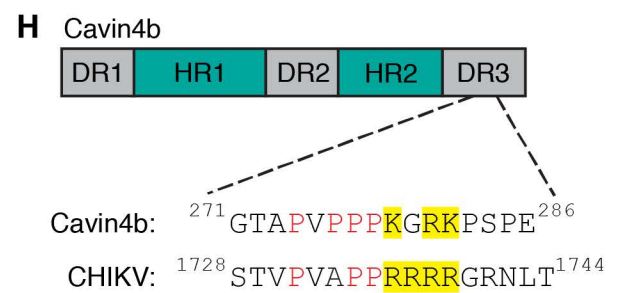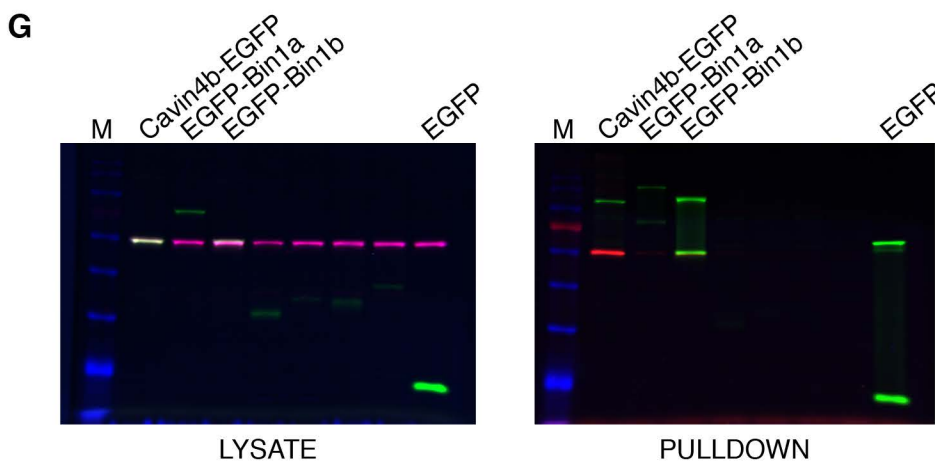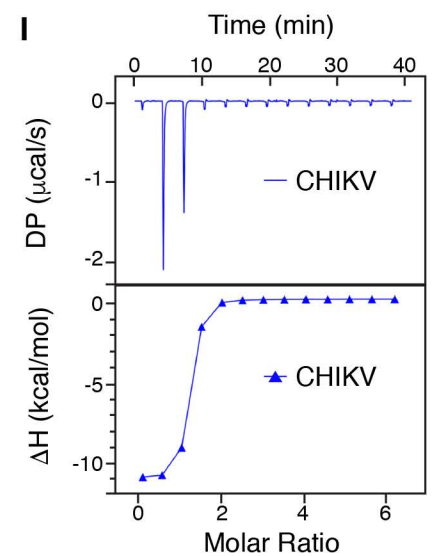

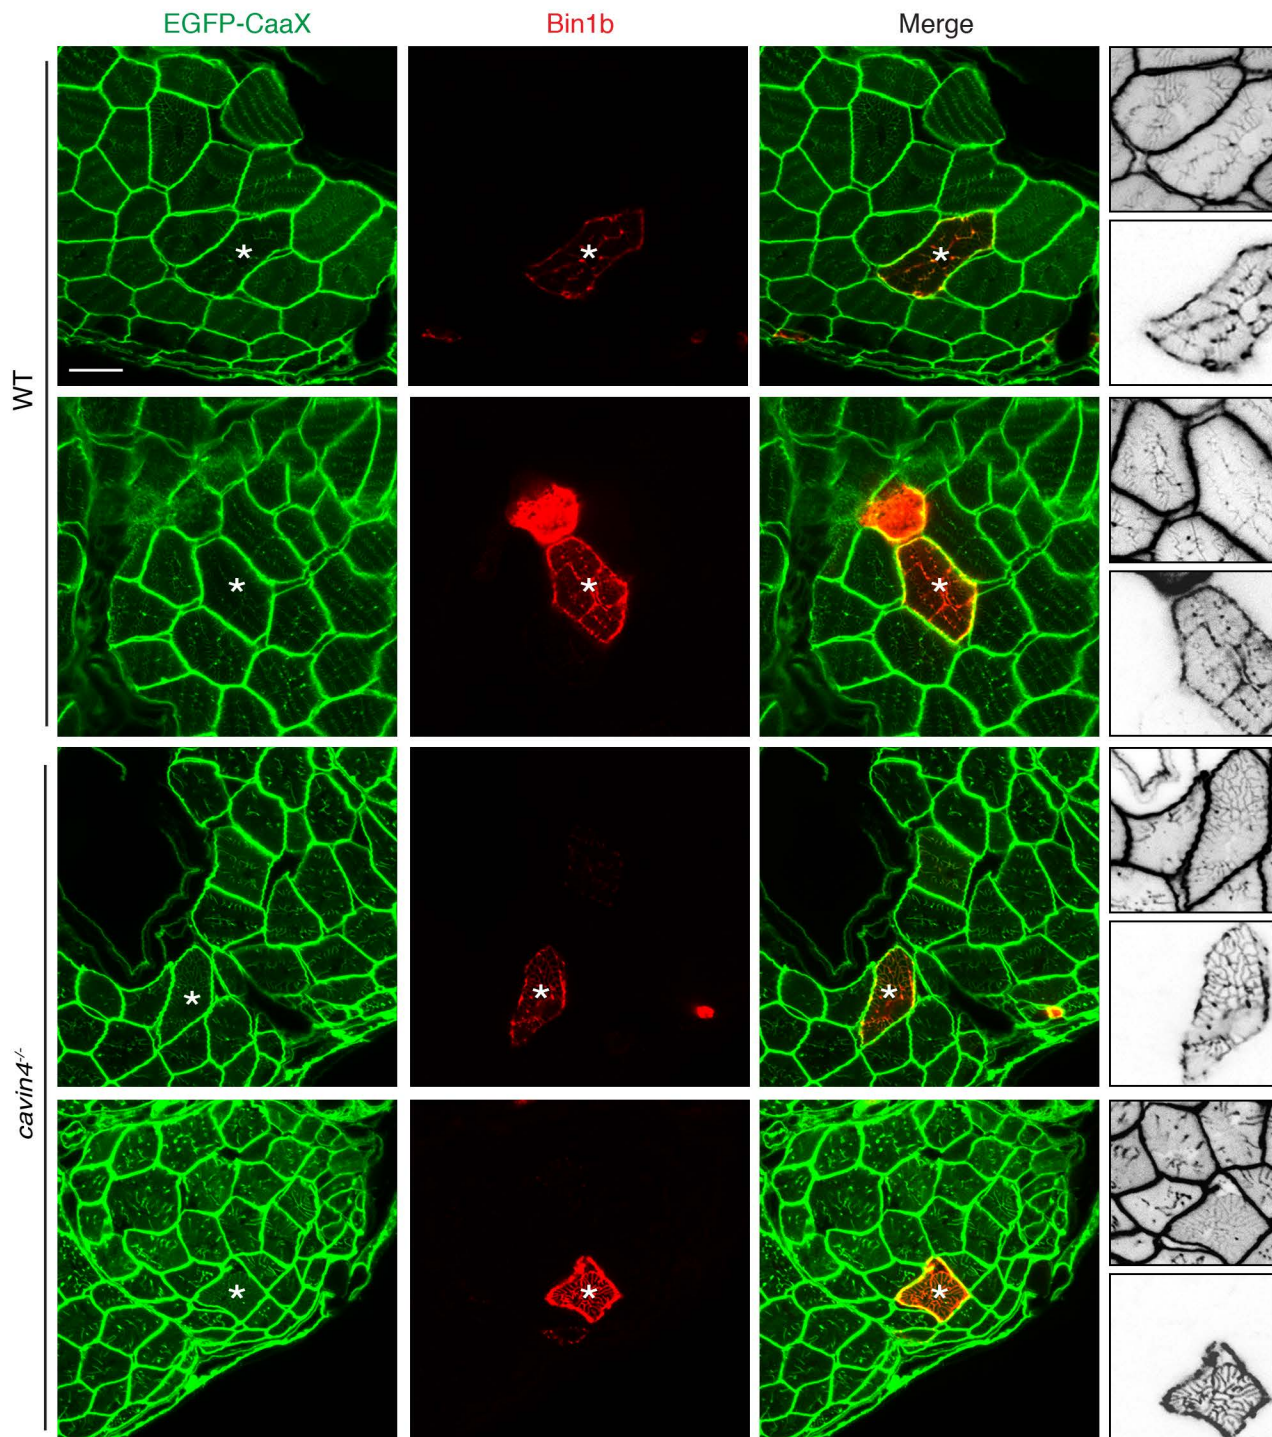



**Table S1.** DNA constructs

| Plasmid name             | Type                                        | Reference               | Addgene ID |
|--------------------------|---------------------------------------------|-------------------------|------------|
| pBluescript(SK+)-Cavin4a | For generating <i>in situ</i> probes        | This study              | 126567     |
| pBluescript(SK+)-Cavin4b | For generating <i>in situ</i> probes        | This study              | 126566     |
| MmCAVIN4-mCherry         | Mammalian expression                        | This study              | Pending    |
| Cavin4b-mCherry          | Mammalian expression                        | This study              | Pending    |
| Cavin4b(PRDmt)-mCherry   | Mammalian expression                        | This study              | Pending    |
| Cavin4a-mCherry          | Mammalian expression                        | This study              | Pending    |
| Cavin4b-EGFP             | Mammalian expression                        | This study              | Pending    |
| EGFP-HsBIN1              | Mammalian expression                        | This study              | Pending    |
| EGFP-Bin1a               | Mammalian expression                        | This study              | Pending    |
| EGFP-Bin1b               | Mammalian expression                        | This study              | Pending    |
| EGFP-SNX8                | Mammalian expression                        | Wang et al., 2007       | N/A        |
| mCherry                  | Mammalian expression                        | This study              | Pending    |
| EGFP                     | Mammalian expression                        | This study              | Pending    |
| acta1-Cavin1a-Clover     | Zebrafish expression                        | This study              | 126926     |
| acta1-Cavin4a-Clover     | Zebrafish expression                        | This study              | 126561     |
| acta1-Cavin4b-Clover     | Zebrafish expression                        | This study              | 126560     |
| acta1-mKate2-Bin1b       | Zebrafish expression                        | Hall et al., 2020       | 109509     |
| acta1-GCaMP5             | Zebrafish expression                        | This study              | 126563     |
| pME-Cavin4a              | Middle entry clone for multisite gateway    | This study              | 109563     |
| pME-Cavin4b              | Middle entry clone for multisite gateway    | This study              | 109562     |
| pME_Cavin4b_PRDmt        | Middle entry clone for multisite gateway    | This study              | Pending    |
| pME-Cavin1a              | Middle entry clone for multisite gateway    | This study              | 126927     |
| pME-GCaMP5               | Middle entry clone for multisite gateway    | This study              | 126569     |
| pME-MmCavin4-NS          | Middle entry clone for multisite gateway    | This study              | 126570     |
| pME-mKate2-NS            | Middle entry clone for multisite gateway    | Hall et al., 2020       | 109729     |
| p3E-Clover               | 3' entry clone for multisite gateway        | This study              | 126572     |
| p3E-EGFP_noATG           | 3' entry clone for multisite gateway        | This study              | 126573     |
| p3E-HsBin1tv8            | 3' entry clone for multisite gateway        | This study              | 126574     |
| p3E-Bin1b                | 3' entry clone for multisite gateway        | Hall et al., 2020       | 109561     |
| pCSDDEST2                | Destination vector for mammalian expression | Villefranc et al., 2007 | 22424      |
| pDEST-Tol2-pA2           | Destination vector for zebrafish expression | Kwan et al., 2007       | N/A        |
| p5E-acta1                | 5' entry clone for multisite gateway        | Jacoby et al., 2009     | N/A        |
| pME-EGFP                 | Middle entry clone for multisite gateway    | Kwan et al., 2007       | N/A        |
| pME-mCherry              | Middle entry clone for multisite gateway    | Kwan et al., 2007       | N/A        |

|                      |                                          |                   |         |
|----------------------|------------------------------------------|-------------------|---------|
| pME-EGFP-NS          | Middle entry clone for multisite gateway | Don et al., 2017  | 75341   |
| p3E-Bin1a            | 3' entry clone for multisite gateway     | Hall et al., 2020 | 109588  |
| SITS-ccdb-EGFP       | Cell-free expression                     | This study        | Pending |
| SITS-EGFP-ccdb       | Cell-free expression                     | This study        | Pending |
| SITS-ccdb-mCherry    | Cell-free expression                     | This study        | Pending |
| SITS-mCherry-ccdb    | Cell-free expression                     | This study        | Pending |
| SITS-Cavin4a-EGFP    | Cell-free expression                     | This study        | Pending |
| SITS-Cavin4b-EGFP    | Cell-free expression                     | This study        | Pending |
| SITS-EGFP-Bin1a      | Cell-free expression                     | This study        | Pending |
| SITS-EGFP-Bin1b      | Cell-free expression                     | This study        | Pending |
| SITS-Cavin4a-mCherry | Cell-free expression                     | This study        | Pending |
| SITS-Cavin4b-mCherry | Cell-free expression                     | This study        | Pending |
| SITS-mCherry-Bin1a   | Cell-free expression                     | This study        | Pending |
| SITS-mCherry-Bin1b   | Cell-free expression                     | This study        | Pending |



829 **Materials and Methods**

830 **Animal maintenance.**

831 WT mice (C57/bl6) were housed according to institutional guidelines (The University  
832 of Queensland), with food and water available *ad libitum*. Zebrafish were maintained  
833 according to institutional guidelines (The University of Queensland). Zebrafish  
834 embryos were raised at 28.5°C in standard E3 (5 mM NaCl, 0.17 mM KCl, 0.33 mM  
835 CaCl<sub>2</sub>, 0.33 mM MgSO<sub>4</sub>). All animal experiments were approved by the University of  
836 Queensland Ethics Committee and University of Queensland Biosafety committee.

837 **Antibodies and reagents.**

838 The following antibodies were used: mouse anti-7D11 (Developmental Studies  
839 Hybridoma Bank), rabbit anti-cav3 (Luetterforst et al., 1999), mouse anti-cav3 (BD  
840 Transduction Laboratories), anti-bin1 (clone 99D, Merck), anti-sarcomeric actin (clone  
841 5C5, Sigma-Aldrich), anti-rabbit and anti-mouse Alexa488- and Alexa555-conjugated  
842 secondary antibodies (Molecular Probes). Affinity purified rabbit anti-Cavin4 was  
843 raised as described previously (Lo et al., 2015). Rabbit anti-Cavin4b antibody (peptide  
844 sequence GEESEVPMYDMKQLS) was raised as described previously (Bastiani et al.,  
845 2009). Anti-mouse and anti-rabbit HRP-conjugated antibodies were from Sigma-  
846 Aldrich. Alexa488-conjugated Phalloidin was from Thermo Fisher. All other reagents  
847 were from Sigma-Aldrich unless otherwise specified.

848 **DNA constructs.**

849 A list of constructs generated for this study can be found in Table S1.

850 **Zebrafish transgenic lines**

851 For this study, we generated the following stable transgenic lines:

852 *Tg(acta1:GCaMP5)<sup>uq16rp</sup>*, *Tg(acta1:Cavin4a-clover)<sup>uq17rp</sup>*, *Tg(acta1:Cavin4b-*  
853 *clover)<sup>uq18rp</sup>* and *Tg(acta1:Cavin1a-clover)<sup>uq19rp</sup>* under the control of the skeletal muscle  
854 alpha-actin promoter using the Tol2 transposon system (Kwan et al., 2007). The

855 *Tg(actb2:EGFP-CAAX)<sup>pc10</sup>*, which expresses GFP-CAAX under the constitutive beta-  
856 actin promoter has been described previously (Williams et al., 2011). The  
857 *Tg(cav3:Cav3GFP)<sup>uq11rp</sup>* expresses Cav3-GFP under the zebrafish *cav3* promoter and  
858 was generated using the Tol2 transposon system as described previously (Lo et al.,  
859 2015).

860 **Quantitative real time PCR analysis (qRT-PCR).** Total RNA from adult zebrafish and  
861 mouse tissues was isolated using TRIzol reagent (Invitrogen, 15596026) as described  
862 previously (Lo et al., 2015). For zebrafish embryos and C2C12 cells, total RNA was  
863 isolated from 5 dpf embryos and cDNA was transcribed using the Superscript III First-  
864 Strand Synthesis System (Invitrogen, 18080051) according to the manufacturer's  
865 instructions. qRT-PCR was carried out using the SYBR green PCR master mix  
866 (Applied Biosystems, 4309155) on an Applied Biosystems ViiA7 Real-time PCR  
867 system and gene expression data was analyzed using the  $\Delta\Delta C_t$  method. PCR primers  
868 were purchased from Sigma-Aldrich. Zebrafish primer sequences have been  
869 previously published (Lim et al., 2017) with the exception of *cavin2a* (forward 5'-  
870 ACCCATCTGCTCAAGAGGAA-3' and reverse: 5'-GAGGAGAGGCTGATGGTCTG-  
871 3') and *cavin2b* (forward 5'- CCACATGAAGGAGGTCAAGG -3' and reverse: 5'-  
872 CAGGTAACGGTGTGGTTCC-3'). Mouse qRT-PCR primers were as follows: *Cav1*  
873 (forward 5'-GCCAGCTTCACCACCTTCAC-3' and reverse 5'-  
874 GCAAAGTAAATGCCCCAGATG-3'), *Cav2* (forward 5'-  
875 GAGCCACGACTGACCACTCA-3' and reverse 5'-  
876 TGGGAAGTGAACAGAACAGTAGTGA-3'), *Cav3* (Lau et al., 2004), *Cavin1* (forward:  
877 5'-TTTTTCTTGGTCCCCTTCCC-3' and reverse 5'- CATCTGCCCAACATTAGCC-  
878 3'), *Cavin2* (forward 5'- AATTGGTCAACATGCTGGACG-3' and reverse 5'-  
879 TTGGTGAGGTCGTTCTGGATG-3'), *Cavin3* (forward 5'-  
880 CCTGCTCTTCAAGGAGGAGACT-3' and reverse 5'-

881 CCAACTTCATCCTCTGGCTGA-3', *Cavin4* (Ogata et al., 2008), *Bin1* (forward 5'-  
882 ACAGCCGTGTAGGTTTCTATG -3' and reverse 5'- TGACTGTGAAGGTGTTGCTC -  
883 3' *36B4* (Wang et al., 2011). qRT-PCR analysis of *Cavin4*<sup>-/-</sup> mouse tissue was  
884 performed using the following *Cavin4* primers: forward 5'-  
885 GCTTAGGAAGTCAGGCAAAGAG -3' and reverse 5'-TTGTCAAGAGTCTGCCGTG-  
886 3'.

#### 887 **Wholmount *in situ* hybridization (ISH).**

888 *Cavin4a* and *cavin4b* constructs were purchased from Integrated Sciences (IMAGE  
889 clones 7252030 and 7052606, respectively) and subcloned into pBluescript. The  
890 *cavin4a* and *cavin4b* probes were synthesized by *in vitro* transcription using T3  
891 polymerase (Life Techonologies, AM1348) and the DIG RNA labeling mix (Roche  
892 Diagnostics, 11277073910). The *anp* probe is as described previously (Smith et al.,  
893 2011). Zebrafish embryos were dechorionated, fixed in 4% PFA and stored in methanol  
894 at -20°C until required. Embryos were rehydrated back into 100% PBST (PBS/0.1%  
895 Tween 20). Embryos older than 24 hpf were permeabilized in 10 µg/mL Proteinase K  
896 solution (8 min for 24 hpf, 28 min for 48 hpf, 30 min for 5dpf and 7dpf embryos)  
897 (Invitrogen, 25530015). ISH was then performed as described previously (Thisse and  
898 Thisse, 2008), with minor modifications as described in Lo et al., 2015. Images were  
899 captured on an Olympus SZX-12 stereomicroscope with an Olympus DP-71 12 Mp  
900 color camera using DP capture software.

#### 901 **Cell culture.**

902 C2C12 cells (ATCC CRL-1772) and baby hamster kidney (BHK) cells (ATCC CCL-10)  
903 were maintained in DMEM containing 10% fetal bovine serum (FBS; Cell Sera F31803)  
904 and 5 mM L-Glutamine (Invitrogen, 25030-081) at 37°C under 5% CO<sub>2</sub>. Cells were  
905 routinely screened for mycoplasma using a MycoAlert Mycoplasma detection kit  
906 (Lonza, LT07-418). C2C12 cells were seeded onto matrigel-coated (BD Biosciences,

907 356234) 60-mm dishes or Ibidi  $\mu$ -slide 8-well tissue culture treated chambers (DKSH  
908 Australia, 50001). Cells were induced to differentiate by replacing 10% FBS with 2%  
909 horse serum (Invitrogen, 26050070) in the growth medium and cells were cultured for  
910 another 4 days. BHK cells were seeded onto 35 mm Ibidi glass bottom dishes (DKSH  
911 Australia, 81218-200) and transfected with DNA constructs using Lipofectamine 3000  
912 (Invitrogen, L3000015) at 70% confluence according to the manufacturer's  
913 instructions.

914 Live confocal imaging of BHK cells was carried out at 37°C on a Zeiss Inverted LSM880  
915 with fast airyscan at 37°C using a x40 Plan Achromat objective (catalogue number  
916 420762-9800-799). At 18 h post-transfection, cell culture medium was replaced with  
917 phenol red free DMEM/F12 medium (Invitrogen Australia, 11039-021) containing 10%  
918 FBS 1 h prior to imaging. T-tubule dynamics were tracked for 6 min with a 3 s interval  
919 and images were processed using Fiji. Bin1b-induced tubules were analyzed using the  
920 analyze particles function. Hyperstacks of 51 frames were temporally color-coded to  
921 visualize the dynamic tubules.

## 922 **Western blot analysis**

923 Cell and tissue lysates were prepared as described previously (Bastiani et al., 2009).  
924 For embryo preparations, 10 3 dpf WT or *cavin4b*<sup>-/-</sup> embryos were used per sample.  
925 For heart lysates, 8 WT adult zebrafish hearts were used per sample. Western blot  
926 analysis was performed as described previously (Lo et al., 2015). Briefly, samples were  
927 homogenized in ice-cold RIPA buffer (50 mM Tris-HCl pH 8.0, 150 mM NaCl, 1% NP-  
928 40, 0.5% sodium deoxycholate, 0.2% sodium dodecyl sulfate) containing cOmplete  
929 protease inhibitors (Sigma-Aldrich, 11836145001) and immediately supplemented with  
930 4X Laemmli's sample buffer (240 mM Tris-HCl pH 6.8, 40% glycerol, 8% sodium  
931 dodecyl sulfate, 0.04% bromophenol blue) and 10 mM DTT. Protein concentrations  
932 were determined using the Pierce BCA protein assay kit (Invitrogen, 23225). Protein



933 samples were analyzed by Western blotting and detected using the ChemiDoc MP  
934 system (BioRad) as per the manufacturer's instructions.

### 935 **CRISPR/Cas9-based generation of *Cavin4*<sup>-/-</sup> mice and C2C12 cells**

936 *Cavin4*<sup>-/-</sup> C2C12 cells and mice were generated at the Queensland Facility for  
937 Advanced Genome Editing (QFAGE), Institute for Molecular Bioscience, The  
938 University of Queensland. For *Cavin4*<sup>-/-</sup> C2C12 cells, four highly specific guide RNA  
939 (gRNA) targeting the first coding exon of mouse *Cavin4* were designed using the online  
940 program CRISPOR. The sequences were as follows: gRNA1,  
941 CTACGCCTGGAGCCAAAAGT; gRNA2, GAATCGGTTGTCAAGTGTGA; gRNA3,  
942 TGTGACCGTGCTGGACAGAG; gRNA4, GGCCCGGGTAGAGAAGCAAC. For  
943 CRISPR delivery, synthetic gRNA (crRNA:tracrRNA duplex, IDT, 10 pmol each) were  
944 mixed with spCas9 protein (IDT) at 1:1 ratio and transfected into 100K C2C12 cells by  
945 electroporation (ThermoFisher Neon) in the following parameters: 1650 V, 10 ms, 3  
946 pulses. Editing efficiency of bulk cell pools were confirmed by T7E1 (T7 Endonuclease  
947 I) assay, followed by single cell cloning using limited dilution in a 96-well plate.  
948 Genomic sequence of isolated clones at targeting locus were further confirmed by PCR  
949 cloning (E1202S, NEB) and Sanger sequencing (AGRF, University of Queensland). A  
950 single clonal line harboring a homozygous 155bp deletion was chosen for further study.  
951 In order to maximize the homozygous reading frame shift mutations in the *Cavin4*<sup>-/-</sup>  
952 mice embryo, two gRNAs targeting the first exon and one gRNA targeting the first  
953 intron of *Cavin4* were designed for co-delivery. The sequences were as follows:  
954 gRNA1, TGTGACCGTGCTGGACAGAG; gRNA2, GGCCCGGGTAGAGAAGCAAC;  
955 gRNA3 (intronic), TGGACACCCCTGTGACTCGG. The efficiency of gRNAs were first  
956 validated in mouse embryonic fibroblasts prior to CRISPR mice experiment. Animal  
957 breeding and microinjection was carried out at the Transgenic Animal Service of  
958 Queensland (TASQ), The University of Queensland. For microinjection, 1µM each of

959 gRNA (IDT) were mixed with spCas9 at 3:2 ratio in embryo grade water (W1503,  
960 Sigma) and injected into wild type C57BL6 zygotes at one-cell stage. Tissue samples  
961 of F0 animals were collected at postnatal day 3. Mouse muscle was removed and flash  
962 frozen in liquid nitrogen, or fixed (in 4% PFA/PBS for cryosectioning or 2.5%  
963 gluteraldehyde/PBS for EM). Genomic DNA was extracted from non-muscle tissue and  
964 PCR performed to identify animals carrying homozygous deletions at the target region.  
965 Reading frame shift mutations and modified sequence were further validated by PCR  
966 cloning and Sanger sequencing. Mouse genomic PCR primers were as follows:  
967 5'AGAGAAAACTTAGTTCAGTGTGGTTGAAG-3' and 5'-  
968 ACAGTTCACATTCCATGACTAATAAGAA-3'.

#### 969 **Immunofluorescence**

970 C2C12 myotubes were fixed in 4% paraformaldehyde (PFA), permeabilized with 0.1%  
971 Triton-X-100, followed by blocking in 0.2% fish skin gelatin (FSG)/0.2% bovine serum  
972 albumin (BSA). Cells were then incubated in primary antibody (diluted in blocking  
973 solution), followed by incubation in secondary antibody and mounting in Mowiol  
974 (Merck, 475904). Confocal images were captured on a Zeiss Axiovert 200 inverted  
975 microscope stand with LSM 710 confocal scanner (63X LD C-Apochromat objective  
976 NA 1.15). Images were processed in ImageJ and Adobe Photoshop.

977 PFA-fixed mouse muscle tissue was washed three times in PBS, acclimated from 15  
978 to 30% sucrose/PBS, then frozen in a dry ice ethanol bath in Tissue-Tek OCT  
979 compound (ProSciTech, IA018). 5  $\mu$ m cryosections were cut on a Leica cryostat and  
980 transferred to Superfrost-Plus microscope slides (Thermo Scientific,  
981 EPBRSF41296SP). Sections were dried at 65°C for 2 h, washed in PBS and  
982 permeabilized with 0.1% Triton-X-100., followed by blocking in 2% BSA. Sections were  
983 then incubated in primary antibody (diluted in blocking solution), followed by incubation  
984 in secondary antibody and mounting in Mowiol (Merck, 475904). Confocal images

985 were captured on a Zeiss Axiovert 200 upright microscope stand with LSM710 meta  
986 confocal scanner (63X objective NA 1.40). Images were processed in ImageJ and  
987 Adobe Photoshop.

### 988 **Live imaging of zebrafish embryos**

989 Zebrafish embryos were anesthetized in tricaine/E3 solution and mounted in 1% low  
990 melting point agarose. Confocal images of mounted embryos (immersed tricaine/E3  
991 solution) were captured on a Zeiss Axiovert 200 upright microscope stand with  
992 LSM710 meta confocal scanner (40X water immersion objective NA 1.0) or Zeiss  
993 Axiovert 200 inverted microscope stand with LSM 710 confocal scanner (63X LD C-  
994 Apochromat objective NA 1.15). For transient expression, DNA was injected into  
995 zebrafish embryos at a concentration of 20 ng/ $\mu$ l and embryos expressing the  
996 fluorescently-tagged protein of interest were chosen prior to imaging. Images were  
997 processed in ImageJ and Adobe Photoshop.

998 For Cavin1a-Clover, Cavin4a-Clover and Cavin4b-Clover transgenic lines, the  
999 fluorescent intensity of T-tubules was calculated by measuring mean grey value of 11  
1000 individual T-tubule per muscle fibre using line scale in ImageJ. The fluorescent  
1001 intensity of the sarcolemma was measured by mean grey value of the sarcolemma  
1002 connected by the 11 T-tubules.

1003 The *cavin4a*<sup>-/-</sup>, *cavin4b*<sup>-/-</sup> and *cavin4*<sup>-/-</sup> mutant lines were crossed into the  
1004 *Tg(cav3:Cav3GFP)<sup>uq11rp</sup>* background. Cav3GFP-expressing heterozygotes were then  
1005 crossed with respective *cavin4a*<sup>-/-</sup>, *cavin4b*<sup>-/-</sup> and *cavin4*<sup>-/-</sup> fish. The resulting embryos,  
1006 along with Cav3GFP-expressing WT embryos were imaged as described above, and  
1007 embryos genotyped post-imaging to identify homozygous mutants. Quantitation of  
1008 sarcolemmal versus T-tubule intensity was calculated by highlighting a rectangular  
1009 area within the relevant area and using ImageJ to measure mean gray values. The

1010 ratio of T-tubule:sarcolemmal fluorescence intensities were calculated by averaging  
1011 the mean grey value from at least 3 different muscle fibers in a single embryo.

### 1012 **Electron microscopy.**

1013 Mouse muscle tissue and zebrafish embryos were processed for EM as described  
1014 previously (Lo et al., 2015) using a modification of the method of (Nguyen et al., 2011).

1015 Briefly, tissue was immersed in a solution of 2.5% glutaraldehyde in PBS and  
1016 immediately irradiated in a Pelco Biowave (Ted Pella Inc) for 3 min at 80 watt under  
1017 vacuum. Samples were transferred to a fresh solution of 2.5% glutaraldehyde in PBS  
1018 and left for 30 min at RT before washing in 0.1 M cacodylate buffer. Samples were  
1019 then immersed in a solution containing potassium ferricyanide (3%) and osmium  
1020 tetroxide (2%) in 0.1M cacodylate buffer for 30 min at RT, then in a filtered solution  
1021 containing thiocarbohydrazide (1%) for 30 min at RT, osmium tetroxide (2%) for 30  
1022 min, then in 1% aqueous uranyl acetate for 30 min at 4°C. After a further staining step  
1023 of 20 min in 0.06% lead nitrate in aspartic acid (pH 5.5) at 60°C samples were  
1024 dehydrated and embedded in Epon LX112 resin. The density of caveolae was  
1025 determined using standard stereological methods on randomly chosen sections  
1026 (Parton, 1994).

1027 For serial blockface sectioning, serial thin sections (50 nm) were cut and imaged as  
1028 previously described on a 3View serial blockface scanning electron microscope in  
1029 backscatter detection mode (Ariotti et al., 2015). Images were aligned using the  
1030 program xalign in IMOD and segmented as previously described (Noske et al., 2008).

1031 Electron tomography was done following the procedures previously described (Richter  
1032 et al., 2008). In brief: for data acquisition a Tecnai G2 F30 TEM operated at 300kV and  
1033 equipped with a Gatan K2 summit direct electron detector was used. Dual-axis tilt  
1034 series were acquired in linear imaging mode over a total tilt angle of +/-60° with  
1035 increments of 1°. SerialEM was used as microscope control and imaging software



1036 (Mastrorarde, 2005). Reconstructions were generated by using radially weighted  
1037 back-projection as implemented in IMOD followed by semi-automated segmentation  
1038 was performed as previously described (Noske et al., 2008).

1039 **CRISPR/Cas9 generation of *cavin4a*<sup>-/-</sup> zebrafish line.**

1040 Target site selection for zebrafish *cavin4a* specific sgRNA was determined using the  
1041 webtool CHOPCHOP (Montague et al., 2014). Targets with more than 50% G/C  
1042 content and no predicted off-target site were chosen. The chosen target sequence with  
1043 juxtaposed PAM sequence of *cavin4a* is as follows:  
1044 GGAACGCCAACAGCAGCTCGAGG, genomic location chr2:42292952. The method  
1045 for cloning-independent synthesis of sgRNA was adopted from (Gagnon et al., 2014)  
1046 and carried out as described previously (Lim et al., 2017). Stable *cavin4a* F1 mutant  
1047 zebrafish lines were identified by Sanger Sequencing using the following primers:  
1048 forward: 5'-TGCGTTTGAGTCCCTTTACC-3' and reverse: 5'-  
1049 GCACACCCTCATTACCAAT-3'. The *cavin1a*<sup>uq5rp</sup> mutant was identified and bred to  
1050 homozygosity. Mutants were confirmed by Sanger sequencing (Australian Genome  
1051 Research Facility, Brisbane) or restriction digest with *Bgl*I (NEB).

1052 **TILLING mutagenesis screen for identification of *cavin4b*<sup>-/-</sup> zebrafish line.**

1053 The *cavin4b*<sup>uq6rp</sup> mutant was identified from a reverse genetics screen performed at  
1054 the Hubrecht Institute, Utrecht, Netherlands using ENU mutagenesis as previously  
1055 described (Wienholds et al., 2003). The *cavin4b*<sup>uq6rp</sup> mutant line was identified by  
1056 screening the library with the following primers: forward: 5'-  
1057 TAAAGAGAAACCCACCGAAG-3' and reverse: 5'-ATGTCACCACACATTTAGGCC-3'  
1058 and bred to homozygosity. Subsequent genotyping of this line was performed using  
1059 the following primers: forward: 5'-AGCGCCATGAACATCTTCTCT-3' and reverse: 5'-  
1060 CTGGTAGATGACGACACGGAA-3'; mutants were confirmed by Sanger sequencing  
1061 (Australian Genome Research Facility, Brisbane) or digestion with  $\alpha$ *Taq*I (NEB).

1062 **Morphometrics of live zebrafish.**

1063 Images of anesthetized embryos were captured on an Olympus SZX12  
1064 stereomicroscope with an Olympus DP70 CCD camera using DP capture software.

1065 Images were processed and assembled using ImageJ and Adobe Photoshop. Body  
1066 length was determined using ImageJ.

1067 Birefringence imaging was performed on anesthetized embryos using a Nikon  
1068 SMZ1500 stereomicroscope with two polarizing filters as previously described (Berger  
1069 et al., 2012; Telfer et al., 2010) using NIS Elements software. Automated quantitation  
1070 of mean gray value was determined using custom ImageJ macros. The full code for  
1071 generating region of interest (Supplementary File 1) and mean gray value  
1072 (Supplementary File 2) has been provided.

1073 **Vibratome sectioning.**

1074 Zebrafish embryos were fixed in 4% PFA overnight at 4°C and mounted in 8% low  
1075 melting point agarose. Vibratome sections were cut to a thickness of 100 µm using a  
1076 Leica VT1000S vibratome and mounted in Mowiol (Calbiochem). Confocal images  
1077 were captured on a Zeiss Axiovert 200 upright microscope stand with LSM710 meta  
1078 confocal scanner (63X objective NA 1.40). Images were processed in ImageJ and  
1079 Adobe Photoshop.

1080 **Zebrafish muscle fiber isolation.**

1081 Muscle fibers were isolated from 4 dpf zebrafish embryos, labeled with primary  
1082 antibodies and nuclei counterstained with DAPI as described previously (Nixon et al.,  
1083 2005). All muscle fibers were examined using an Olympus BX-51 fluorescence  
1084 microscope. For Cav3 immunolabeled fibers, individual non-contracted muscle fibers  
1085 were selected via the freehand selection tool and measured for integrated density via  
1086 ImageJ. Background value was determined as a product of mean gray value and the  
1087 mean area of selected regions surrounding a particular fiber. To measure the corrected

1088 total cell fluorescence (CTCF) of each fiber, the integrated density of each fiber was  
1089 subtracted with its corresponding background value.

#### 1090 **Embryo swimming analysis.**

1091 Zebrafish embryos were placed into 24-well plates (one embryo per well), incubated  
1092 at 28°C and analysis was performed using the Zebrabox (Viewpoint)  
1093 (<http://www.viewpoint.fr/en/p/equipment/zebrabox>) according to the manufacturer's  
1094 instructions and as described in Giacomotto et al., 2015. Plates were incubated in the  
1095 dark for 1 h, followed by recording of swimming behaviour for 10 min under light. Data  
1096 were exported and processed using Microsoft Excel.

#### 1097 **Swim tunnel assessment.**

1098 Six month old male WT and *cavin-4b*<sup>-/-</sup> zebrafish were immobilized in tricaine. Body  
1099 length (BL; measured from the snout to tip of zebrafish before caudal fin) was  
1100 measured and zebrafish allowed to recover for 30 min. Individual zebrafish were  
1101 acclimatized for 10 min in the swimming chamber (Loligo Systems) illuminated in the  
1102 forward swimming direction. The swim tunnel assessment was started at a water flow  
1103 speed of 150 rpm for 10 min. Water flow was subsequently increased by a function of  
1104 the BL of individual zebrafish every 10 min until fatigue (defined as the inability of the  
1105 zebrafish to remove itself from the downstream mesh screen for more than 5 s) was  
1106 observed. A standard curve of water velocity (cm/s) was generated using handheld  
1107 digital flow meter and vane wheel probe (Loligo Systems). Water in the swim tunnel  
1108 was heated to approximately 25°C using standard aquarium water heaters. The critical  
1109 swimming speed (Ucrit) was calculated using the following equation:

$$1110 \quad U_{crit} = U_i + [ U_{ii} / (T_i/T_{ii}) ]$$

1111 where  $U_i$  denoted the highest speed successfully maintained throughout the series of  
1112 10-min intervals;  $U_{ii}$  denoted the speed increment (linear function of the BL of  
1113 individual zebrafish);  $T_i$  represented the fraction of the 10-min interval elapsed upon

1114 fatigue; Tii represented the period of time interval (10 min) (Plaut, 2000).

1115 ***In vivo* Ca<sup>2+</sup> imaging in zebrafish embryos.**

1116 The *cavin4*<sup>-/-</sup> mutant line was crossed into the *Tg(acta1-GCaMP5)* transgenic line.  
1117 GCaMP-positive *cavin4*<sup>-/-</sup> embryos were generated from homozygote x heterozygote  
1118 crosses. Homozygous *cavin4*<sup>-/-</sup> were identified using a tail tipping method as described  
1119 previously (Wilkinson et al., 2013). Individually anesthetized embryos were mounted  
1120 in 1% low melting point agarose in a petri dish and electrically stimulated using a  
1121 Square Pulse Stimulator S44 (Grass Instruments). Electrical stimulation settings were  
1122 as follows: 1 ms pulse every 4 s, 80V, minimum delay (1 x 0.01 ms). Images were  
1123 captured on a Zeiss LSM 510 upright confocal microscope Images were captured on  
1124 a Zeiss LSM 710 upright confocal microscope (20X water immersion objective, NA 0.5)  
1125 in line-scan mode at a sampling rate of 5000 measurements over 40 s. Fluorescence  
1126 intensities were analyzed in Microsoft Excel. For analysis, the average values were  
1127 calculated for every 10th measurement, giving a total of 500 measurements. Amplitude  
1128 ( $\Delta F/F$ ) was calculated using the equation:  $(F_{max}-F_{min})/F_{min}$ , where  $F_{max}$ =maximum  
1129 intensity and  $F_{min}$ =background, and were determined using the MAX:MIN  
1130 function in Microsoft Excel. Decay of signal (half-life) was determined using the single-  
1131 exponential decay function in GraphPad Prism. Average amplitude and decay per  
1132 embryo were determined using the 2<sup>nd</sup> response peak after application of stimulation  
1133 and was calculated as the mean of a minimum of 3 different muscle fibers from a single  
1134 embryo.

1135 **Cell-free protein expression-coupled AlphaLISA**

1136 Open reading frames were cloned into cell-free expression vectors containing SITS  
1137 and fluorescent tags using the Gateway cloning system (Johnston et al., 2019). The  
1138 co-expression of proteins in the *Leishmania tarentolae* cell-free expression (LTE)  
1139 system was performed as described elsewhere (Varasteh Moradi et al., 2020). In brief,



1140 the DNA templates for GFP and mCherry fusion proteins (20 nM and 40 nM  
1141 respectively) were added concomitantly to the LTE reaction mixture, and samples were  
1142 incubated for 4 h at 27 °C for expression. The quality of expressed proteins was  
1143 examined by semi-denaturing SDS-PAGE imaged by ChemiDoc MP system (BioRad).  
1144 For AlphaLISA assay, protein samples were diluted 25 times in buffer A (25 mM  
1145 HEPES, 50 mM NaCl, 0.1% BSA, and 0.01% v/v Nonidet, pH:7.5). Biotinylated  
1146 mCherry nanobody (1  $\mu$ L, diluted in buffer A to a final concentration of 4 nM) was  
1147 added to a 384-well microplate (OptiPlate™-384 Plus, Perkin Elmer) followed by the  
1148 addition of 15  $\mu$ L diluted proteins and 5  $\mu$ L of the GFP antibody-conjugated acceptor  
1149 beads (5x). The mixture was incubated for 30 min at room temperature. Subsequently,  
1150 5  $\mu$ L of streptavidin-coated donor beads (5x) were added to samples under low light  
1151 conditions and incubated for 30 min at room temperature. The AlphaLISA signal was  
1152 detect with the Tecan Spark multimode microplate reader using the following settings:  
1153 Mode: AlphaLISA, Excitation time: 130 ms, Integration time: 300 ms. Each protein pair  
1154 was tested in triplicate and the detected Alpha signal values reported are the mean of  
1155 three measurements.

#### 1156 **Recombinant protein transformation and expression**

1157 N-terminally Histidine (His)-tagged Bin1b SH3 from zebrafish was cloned into pET-28a  
1158 (+) expression vector (GenScript®). Full length zebrafish Cavin4a (Cavin4a-FL) and  
1159 Cavin4b (Cavin4b-FL) were both cloned using the overlap extension PCR method into  
1160 a pHUE expression vector at *SacII* restriction enzyme site with N-terminal 6  $\times$  His-  
1161 ubiquitin tag (His-Ub). The Bin1b-SH3 construct was transformed into *Eschericia coli*  
1162 Rosetta™ 2 (DE3) competent cells (Novagen, Merck, 71403) by heat shock. Cavin4a-  
1163 FL and Cavin4b-FL constructs were transformed into *Eschericia coli* strain BL21  
1164 CodonPlus™ (DE3) competent cells (Integrated Sciences, 230280). Cells were  
1165 propagated in LB media and recombinant protein expression performed by inducing

1166 with 500  $\mu$ L (0.5 mM) Isopropyl  $\beta$ -D-1-thiogalactopyranoside (IPTG, Cat No. BIO-  
1167 37036) at 18°C overnight (~ 20 h). The resultant cell culture was harvested in 50 mM  
1168 HEPES, pH 7.4, 100 mM NaCl, 5 mM Imidazole buffer (Binb SH3 domain expression)  
1169 or 20 mM HEPES, pH 7.4, 500 mM NaCl, 5 mM Imidazole buffer (Cavin4a-FL and  
1170 Cavin4b-FL) with addition of benzamidine hydrochloride and DNase.

#### 1171 **Recombinant protein purification**

1172 Harvested cells were lysed by high-pressure homogenization using a continuous flow  
1173 cell disruptor (Constant Systems Limited, UK) at 32 kPsi at 5°C with addition of 0.5%  
1174 w/v Triton X-100 followed by 30 min high-speed centrifugation at 38,000  $\times$  g using  
1175 Beckman JA 25.5 rotor. The supernatant was incubated with pre-equilibrated specific  
1176 TALON<sup>®</sup> metal affinity resin (ClonTech, Scientifix, 635503) for 1 h with continuous  
1177 stirring at 4°C. The His-tagged SH3 domain bound with TALON<sup>®</sup> resin were washed  
1178 with 50 mM HEPES, pH 7.4, 100 mM NaCl, 5 mM imidazole and eluted by 50 mM  
1179 HEPES, pH 7.4, 100 mM NaCl, 300 mM imidazole. The His-Ub tagged Cavin4a-FL  
1180 and Cavin4b-FL proteins bound with TALON<sup>®</sup> resin were washed with 20 mM HEPES,  
1181 pH 7.4, 500 mM NaCl, 5 mM imidazole and eluted by 20 mM HEPES, pH 7.4, 500 mM  
1182 NaCl, 300 mM imidazole. The eluted Binb SH3 sample was immediately loaded on  
1183 size exclusion chromatography column HiLoad<sup>™</sup> 16/600 Superdex<sup>™</sup> 75 prep grade  
1184 column (GE Healthcare) pre-equilibrated with 0.22  $\mu$ m filtered 50 mM HEPES, pH 7.4,  
1185 100 mM NaCl buffer containing 1 mM dithiothreitol (DTT). The eluted Cavin4a-FL and  
1186 Cavin4b-FL proteins were loaded on size exclusion chromatography column  
1187 Superose<sup>™</sup> 6 Increase 10/300 GL column (GE healthcare) pre-equilibrated with 0.22  
1188  $\mu$ m filtered 50 mM HEPES, pH 7.4, 100 mM NaCl, 1mM DTT buffer.

#### 1189 **Isothermal Titration Calorimetry (ITC)**

1190 The CHIKV and zebrafish Cavin4b proline-rich peptides were synthesized by  
1191 GenScript<sup>®</sup> and dissolved in sterile water to a concentration of 6 mM stock solution.

1192 The peptide pH was adjusted to neutral by mixing 10  $\mu$ L of 6 mM peptide stock with 5  
1193  $\mu$ L buffer containing of 150 mM HEPES, pH 8.0, 300 mM NaCl, 3 mM DTT to a final  
1194 concentration of 600  $\mu$ M with a neutral pH containing 50 mM HEPES, 100 mM NaCl,  
1195 1mM DTT buffer for downstream ITC experiments. All microcalorimetry experiments  
1196 of zebrafish Bin1b SH3 domain were determined using a MicroCal iTC200 calorimeter  
1197 (Malvern) at 25°C. The ITC experiments were carried out with one single 0.4  $\mu$ L  
1198 injection followed by 12 injections of 3.22  $\mu$ L each with stirring speed of 750 rpm and  
1199 180 s injection spacing. All peptides were dissolved in the same buffer prior to ITC  
1200 experiments. 600  $\mu$ M CHIKV peptide or 600  $\mu$ M Cavin4b peptide was titrated into 20  
1201  $\mu$ M Bin1b SH3 solution in the sample cell containing the same buffer (50 mM HEPES,  
1202 pH 7.4, 100 mM NaCl, 1 mM DTT). The competitive ITC experiments were conducted  
1203 by titrating 600  $\mu$ M Cavin4b peptide into 20  $\mu$ M Bin1b SH3 with 20  $\mu$ M CHIKV peptide  
1204 pre-incubated on ice for 30 min. To examine the interaction of Bin1b SH3 domain and  
1205 full-length Cavin4a and Cavin4b protein, 600  $\mu$ M Bin1b SH3 was titrated into 20  $\mu$ M  
1206 Cavin4a and Cavin4b full-length proteins respectively, containing 50 mM HEPES, pH  
1207 7.4, 100 mM NaCl, 1 mM DTT. Thermodynamic profiles were generated using Prism  
1208 8. The experiment was conducted with three technical replicates.

#### 1209 **GFP-trap pulldown with in-gel fluorescence**

1210 BHK cells were seeded at a concentration of  $5 \times 10^3$  cells/cm<sup>2</sup>. The next day, DNA  
1211 transfection was performed using Lipofectamine 3000 (Invitrogen) according to the  
1212 manufacturer's instruction. At 16 h post-transfection, cells were lysed in either NP-40  
1213 buffer (50 mM Tris-HCl, 150 mM NaCl, 1% NP-40 and 5 mM EDTA), or TNE buffer (50  
1214 mM Tris-HCl, 150 mM NaCl, 5 mM EDTA) supplemented with cComplete™ Protease  
1215 Inhibitor Cocktail at 4°C. Cells in lysis buffer were disrupted with a 25-gauge needle  
1216 syringe (~15 times) and incubated on ice for 30 min. Samples were spun at 14000 x g  
1217 for 10 min at 4 °C and the cleared lysates were incubated with amylose resins pre-

1218 coated with MBP-tagged GFPtrap beads for 1 h at 4°C. After incubation, amylose resin  
1219 was separated from solution by centrifugation at 2,000 g for 3 min, and washed three  
1220 times with lysis buffer. The GFP-MBP and its captured proteins were eluted from  
1221 amylose resin by 10 mM maltose in lysis buffer. The eluted proteins were separated  
1222 by semi-denaturing PAGE followed by in-gel fluorescence with the ChemiDoc MP  
1223 system as per the manufactures's instruction.

1224 **Statistical analyses.** Statistical analyses were performed using Microsoft Excel and  
1225 GraphPad Prism (GraphPad). Error bars represent mean±SD. P-values were  
1226 determined using an unpaired Student's t-test unless otherwise specified; values less  
1227 than 0.05 were considered statistically significant.

1228



1229 **References**

1230

1231 Ariotti, N., T.E. Hall, J. Rae, C. Ferguson, K.A. McMahon, N. Martel, R.E. Webb, R.I.

1232 Webb, R.D. Teasdale, and R.G. Parton. 2015. Modular Detection of GFP-Labeled

1233 Proteins for Rapid Screening by Electron Microscopy in Cells and Organisms. *Dev*

1234 *Cell*. 35:513-525.

1235 Balijepalli, R.C., and T.J. Kamp. 2008. Caveolae, ion channels and cardiac

1236 arrhythmias. *Prog Biophys Mol Biol*. 98:149-160.

1237 Bastiani, M., L. Liu, M.M. Hill, M.P. Jedrychowski, S.J. Nixon, H.P. Lo, D. Abankwa, R.

1238 Luetterforst, M. Fernandez-Rojo, M.R. Breen, S.P. Gygi, J. Vinten, P.J. Walser, K.N.

1239 North, J.F. Hancock, P.F. Pilch, and R.G. Parton. 2009. MURC/Cavin-4 and cavin

1240 family members form tissue-specific caveolar complexes. *J Cell Biol*. 185:1259-1273.

1241 Berger, J., and P.D. Currie. 2012. Zebrafish models flex their muscles to shed light on

1242 muscular dystrophies. *Dis Mod Mech*. 5:726-732.

1243 Berger, J., T. Sztal, and P.D. Currie. 2012. Quantification of birefringence readily

1244 measures the level of muscle damage in zebrafish. *Biochem Biophys Res Commun*.

1245 423:785-788.

1246 Butler, M.H., C. David, G.C. Ochoa, Z. Freyberg, L. Daniell, D. Grabs, O. Cremona,

1247 and P. De Camilli. 1997. Amphiphysin II (SH3P9; BIN1), a member of the

1248 amphiphysin/Rvs family, is concentrated in the cortical cytomatrix of axon initial

1249 segments and nodes of ranvier in brain and around T tubules in skeletal muscle. *J Cell*

1250 *Biol*. 137:1355-1367.

1251 Carozzi, A.J., E. Ikonen, M.R. Lindsay, and R.G. Parton. 2000. Role of cholesterol in

1252 developing T-tubules: analogous mechanisms for T-tubule and caveolae biogenesis.

1253 *Traffic*. 1:326-341.

1254 Cheng, J.P., C. Mendoza-Topaz, G. Howard, J. Chadwick, E. Shvets, A.S. Cowburn,

1255 B.J. Dunmore, A. Crosby, N.W. Morrell, and B.J. Nichols. 2015. Caveolae protect

1256 endothelial cells from membrane rupture during increased cardiac output. *J Cell Biol.*  
1257 211:53-61.

1258 Chin, Y.H., A. Lee, H.W. Kan, J. Laiman, M.C. Chuang, S.T. Hsieh, and Y.W. Liu.  
1259 2015. Dynamin-2 mutations associated with centronuclear myopathy are  
1260 hypermorphic and lead to T-tubule fragmentation. *Hum Mol Genet.* 24:5542-5554.

1261 Cowling, B.S., I. Prokic, H. Tasfaout, A. Rabai, F. Humbert, B. Rinaldi, A.S. Nicot, C.  
1262 Kretz, S. Friant, A. Roux, and J. Laporte. 2017. Amphiphysin (BIN1) negatively  
1263 regulates dynamin 2 for normal muscle maturation. *J Clin Invest.* 127:4477-4487.

1264 Don, E.K., I. Formella, A.P. Badrock, T.E. Hall, M. Morsch, E. Hortle, A. Hogan, S.  
1265 Chow, S.S. Gwee, J.J. Stoddart, G. Nicholson, R. Chung, and N.J. Cole. 2017. A Tol2  
1266 Gateway-Compatible Toolbox for the Study of the Nervous System and  
1267 Neurodegenerative Disease. *Zebrafish.* 14:69-72.

1268 Drab, M., P. Verkade, M. Elger, M. Kasper, M. Lohn, B. Lauterbach, J. Menne, C.  
1269 Lindschau, F. Mende, F.C. Luft, A. Schedl, H. Haller, and T.V. Kurzchalia. 2001. Loss  
1270 of caveolae, vascular dysfunction, and pulmonary defects in caveolin-1 gene-disrupted  
1271 mice. *Science.* 293:2449-2452.

1272 Dulhunty, A.F., and C. Franzini-Armstrong. 1975. The relative contributions of the folds  
1273 and caveolae to the surface membrane of frog skeletal muscle fibres at different  
1274 sarcomere lengths. *J Physiol.* 250:513-539.

1275 Flucher, B.E. 1992. Structural analysis of muscle development: transverse tubules,  
1276 sarcoplasmic reticulum, and the triad. *Dev Biol.* 154:245-260.

1277 Fra, A.M., E. Williamson, K. Simons, and R.G. Parton. 1995. De novo formation of  
1278 caveolae in lymphocytes by expression of VIP21-caveolin. *Proc Natl Acad Sci USA.*  
1279 92:8655-8659.

1280 Franzini-Armstrong, C. 1991. Simultaneous maturation of transverse tubules and  
1281 sarcoplasmic reticulum during muscle differentiation in the mouse. *Dev Biol.* 146:353-  
1282 363.

1283 Franzini-Armstrong, C. 2018. The relationship between form and function throughout  
1284 the history of excitation-contraction coupling. *J Gen Physiol.* 150:189-210.

1285 Franzini-Armstrong, C., L. Landmesser, and G. Pilar. 1975. Size and shape of  
1286 transverse tubule openings in frog twitch muscle fibers. *J Cell Biol.* 64:493-497.

1287 Gagnon, J.A., E. Valen, S.B. Thyme, P. Huang, L. Akhmetova, A. Pauli, T.G.  
1288 Montague, S. Zimmerman, C. Richter, and A.F. Schier. 2014. Efficient mutagenesis by  
1289 Cas9 protein-mediated oligonucleotide insertion and large-scale assessment of single-  
1290 guide RNAs. *PloS one.* 9:e98186.

1291 Galbiati, F., J.A. Engelman, D. Volonte, X.L. Zhang, C. Minetti, M. Li, H. Hou, Jr., B.  
1292 Kneitz, W. Edelmann, and M.P. Lisanti. 2001. Caveolin-3 null mice show a loss of  
1293 caveolae, changes in the microdomain distribution of the dystrophin-glycoprotein  
1294 complex, and t-tubule abnormalities. *J Biol Chem.* 276:21425-21433.

1295 Giacomotto, J., S. Rinkwitz, and T.S. Becker. 2015. Effective heritable gene  
1296 knockdown in zebrafish using synthetic microRNAs. *Nature communications.* 6:7378.

1297 Hagiwara, Y., T. Sasaoka, K. Araishi, M. Imamura, H. Yorifuji, I. Nonaka, E. Ozawa,  
1298 and T. Kikuchi. 2000. Caveolin-3 deficiency causes muscle degeneration in mice. *Hum*  
1299 *Mol Genet.* 9:3047-3054.

1300 Hall, T.E., N. Martel, N. Ariotti, Z. Xiong, H.P. Lo, C. Ferguson, J. Rae, Y.W. Lim, and  
1301 R.G. Parton. 2020. In vivo cell biological screening identifies an endocytic capture  
1302 mechanism for T-tubule formation. *Nat Commun.* 11:3711.

1303 Hansen, C.G., N.A. Bright, G. Howard, and B.J. Nichols. 2009. SDPR induces  
1304 membrane curvature and functions in the formation of caveolae. *Nat Cell Biol.* 11:807-  
1305 814.

- 1306 Hansen, C.G., E. Shvets, G. Howard, K. Riento, and B.J. Nichols. 2013. Deletion of  
1307 cavin genes reveals tissue-specific mechanisms for morphogenesis of endothelial  
1308 caveolae. *Nat Commun.* 4:1831.
- 1309 Hill, M.M., M. Bastiani, R. Luetterforst, M. Kirkham, A. Kirkham, S.J. Nixon, P. Walser,  
1310 D. Abankwa, V.M. Oorschot, S. Martin, J.F. Hancock, and R.G. Parton. 2008. PTRF-  
1311 Cavin, a conserved cytoplasmic protein required for caveola formation and function.  
1312 *Cell.* 132:113-124.
- 1313 Hohendahl, A., A. Roux, and V. Galli. 2016. Structural insights into the centronuclear  
1314 myopathy-associated functions of BIN1 and dynamin 2. *J Struct Biol.* 196:37-47.
- 1315 Housley, M.P., B. Njaine, F. Ricciardi, O.A. Stone, S. Holper, M. Kruger, S. Kostin, and  
1316 D.Y. Stainier. 2016. Cavin4b/Murcb Is Required for Skeletal Muscle Development and  
1317 Function in Zebrafish. *PLoS Genet.* 12:e1006099.
- 1318 Ibrahim, M., J. Gorelik, M.H. Yacoub, and C.M. Terracciano. 2011. The structure and  
1319 function of cardiac t-tubules in health and disease. *Proc Biol Sci.* 278:2714-2723.
- 1320 Ishikawa, H. 1968. Formation of elaborate networks of T-system tubules in cultured  
1321 skeletal muscle with special reference to the T-system formation. *J Cell Biol.* 38:51-66.
- 1322 Jacoby, A.S., E. Busch-Nentwich, R.J. Bryson-Richardson, T.E. Hall, J. Berger, S.  
1323 Berger, C. Sonntag, C. Sachs, R. Geisler, D.L. Stemple, and P.D. Currie. 2009. The  
1324 zebrafish dystrophic mutant softy maintains muscle fibre viability despite basement  
1325 membrane rupture and muscle detachment. *Development.* 136:3367-3376.
- 1326 Johnston, W.A., S.V. Moradi, and K. Alexandrov. 2019. Adaption of the Leishmania  
1327 Cell-Free Expression System to High-Throughput Analysis of Protein Interactions.  
1328 *Methods Mol Biol.* 2025:403-421.
- 1329 Keenan, S.R., and P.D. Currie. 2019. The Developmental Phases of Zebrafish  
1330 Myogenesis. *J Dev Biol.* 7.



1331 Kirkham, M., S.J. Nixon, M.T. Howes, L. Abi-Rached, D.E. Wakeham, M. Hanzal-  
1332 Bayer, C. Ferguson, M.M. Hill, M. Fernandez-Rojo, D.A. Brown, J.F. Hancock, F.M.  
1333 Brodsky, and R.G. Parton. 2008. Evolutionary analysis and molecular dissection of  
1334 caveola biogenesis. *J Cell Sci.* 121:2075-2086.

1335 Kovtun, O., V.A. Tillu, W. Jung, N. Leneva, N. Ariotti, N. Chaudhary, R.A. Mandyam,  
1336 C. Ferguson, G.P. Morgan, W.A. Johnston, S.J. Harrop, K. Alexandrov, R.G. Parton,  
1337 and B.M. Collins. 2014. Structural insights into the organization of the cavin membrane  
1338 coat complex. *Dev Cell.* 31:405-419.

1339 Kwan, K.M., E. Fujimoto, C. Grabher, B.D. Mangum, M.E. Hardy, D.S. Campbell, J.M.  
1340 Parant, H.J. Yost, J.P. Kanki, and C.B. Chien. 2007. The Tol2kit: a multisite gateway-  
1341 based construction kit for Tol2 transposon transgenesis constructs. *Dev Dyn.*  
1342 236:3088-3099.

1343 Lau, P., S.J. Nixon, R.G. Parton, and G.E. Muscat. 2004. RORalpha regulates the  
1344 expression of genes involved in lipid homeostasis in skeletal muscle cells: caveolin-3  
1345 and CPT-1 are direct targets of ROR. *J Biol Chem.* 279:36828-36840.

1346 Lee, E., M. Marcucci, L. Daniell, M. Pypaert, O.A. Weisz, G.C. Ochoa, K. Farsad, M.R.  
1347 Wenk, and P. De Camilli. 2002. Amphiphysin 2 (Bin1) and T-tubule biogenesis in  
1348 muscle. *Science.* 297:1193-1196.

1349 Lee, J., and G.W. Schmid-Schonbein. 1995. Biomechanics of skeletal muscle  
1350 capillaries: hemodynamic resistance, endothelial distensibility, and pseudopod  
1351 formation. *Ann Biomed Eng.* 23:226-246.

1352 Levin, K.R., and E. Page. 1980. Quantitative studies on plasmalemmal folds and  
1353 caveolae of rabbit ventricular myocardial cells. *Circ Res.* 46:244-255.

1354 Lim, Y.W., H.P. Lo, C. Ferguson, N. Martel, J. Giacomotto, G.A. Gomez, A.S. Yap,  
1355 T.E. Hall, and R.G. Parton. 2017. Caveolae Protect Notochord Cells against  
1356 Catastrophic Mechanical Failure during Development. *Curr Biol.* 27:1968-1981 e1967.

1357 Liu, L., D. Brown, M. McKee, N.K. Lebrasseur, D. Yang, K.H. Albrecht, K. Ravid, and  
1358 P.F. Pilch. 2008. Deletion of Cavin/PTRF causes global loss of caveolae, dyslipidemia,  
1359 and glucose intolerance. *Cell Metab.* 8:310-317.

1360 Lo, H.P., S.J. Nixon, T.E. Hall, B.S. Cowling, C. Ferguson, G.P. Morgan, N.L. Schieber,  
1361 M.A. Fernandez-Rojo, M. Bastiani, M. Floetenmeyer, N. Martel, J. Laporte, P.F. Pilch,  
1362 and R.G. Parton. 2015. The caveolin-cavin system plays a conserved and critical role  
1363 in mechanoprotection of skeletal muscle. *J Cell Biol.* 210:833-849.

1364 Luetterforst, R., E. Stang, N. Zorzi, A. Carozzi, M. Way, and R.G. Parton. 1999.  
1365 Molecular characterization of caveolin association with the Golgi complex:  
1366 identification of a cis-Golgi targeting domain in the caveolin molecule. *J Cell Biol.*  
1367 145:1443-1459.

1368 Mastronarde, D.N. 2005. Automated electron microscope tomography using robust  
1369 prediction of specimen movements. *J Struct Biol.* 152:36-51.

1370 McMahon, K.A., H. Zajicek, W.P. Li, M.J. Peyton, J.D. Minna, V.J. Hernandez, K. Luby-  
1371 Phelps, and R.G. Anderson. 2009. SRBC/cavin-3 is a caveolin adapter protein that  
1372 regulates caveolae function. *EMBO J.* 28:1001-1015.

1373 Montague, T.G., J.M. Cruz, J.A. Gagnon, G.M. Church, and E. Valen. 2014.  
1374 CHOPCHOP: a CRISPR/Cas9 and TALEN web tool for genome editing. *Nucleic Acids*  
1375 *Res.* 42:W401-407.

1376 Nguyen, J.V., I. Soto, K.Y. Kim, E.A. Bushong, E. Oglesby, F.J. Valiente-Soriano, Z.  
1377 Yang, C.H. Davis, J.L. Bedont, J.L. Son, J.O. Wei, V.L. Buchman, D.J. Zack, M. Vidal-  
1378 Sanz, M.H. Ellisman, and N. Marsh-Armstrong. 2011. Myelination transition zone  
1379 astrocytes are constitutively phagocytic and have synuclein dependent reactivity in  
1380 glaucoma. *Proc Natl Acad Sci USA.* 108:1176-1181.

1381 Nixon, S.J., J. Wegner, C. Ferguson, P.F. Mery, J.F. Hancock, P.D. Currie, B. Key, M.  
1382 Westerfield, and R.G. Parton. 2005. Zebrafish as a model for caveolin-associated

1383 muscle disease; caveolin-3 is required for myofibril organization and muscle cell  
1384 patterning. *Hum Mol Genet.* 14:1727-1743.

1385 Noske, A.B., A.J. Costin, G.P. Morgan, and B.J. Marsh. 2008. Expedited approaches  
1386 to whole cell electron tomography and organelle mark-up in situ in high-pressure frozen  
1387 pancreatic islets. *J Struct Biol.* 161:298-313.

1388 Ogata, T., D. Naito, N. Nakanishi, Y.K. Hayashi, T. Taniguchi, K. Miyagawa, T.  
1389 Hamaoka, N. Maruyama, S. Matoba, K. Ikeda, H. Yamada, H. Oh, and T. Ueyama.  
1390 2014. MURC/Cavin-4 facilitates recruitment of ERK to caveolae and concentric cardiac  
1391 hypertrophy induced by alpha1-adrenergic receptors. *Proc Natl Acad Sci USA.*  
1392 111:3811-3816.

1393 Ogata, T., T. Ueyama, K. Isodono, M. Tagawa, N. Takehara, T. Kawashima, K.  
1394 Harada, T. Takahashi, T. Shioi, H. Matsubara, and H. Oh. 2008. MURC, a muscle-  
1395 restricted coiled-coil protein that modulates the Rho/ROCK pathway, induces cardiac  
1396 dysfunction and conduction disturbance. *Mol Cell Biol.* 28:3424-3436.

1397 Parton, R.G. 1994. Ultrastructural localization of gangliosides; GM1 is concentrated in  
1398 caveolae. *J Histochem Cytochem.* 42:155-166.

1399 Parton, R.G. 2018. Caveolae: Structure, Function, and Relationship to Disease. *Annu*  
1400 *Rev Cell Dev Biol.* 34:111-136.

1401 Parton, R.G., V.A. Tillu, and B.M. Collins. 2018. Caveolae. *Curr Biol.* 28:R402-R405.

1402 Parton, R.G., M. Way, N. Zorzi, and E. Stang. 1997. Caveolin-3 associates with  
1403 developing T-tubules during muscle differentiation. *J Cell Biol.* 136:137-154.

1404 Plaut, I. 2000. Effects of fin size on swimming performance, swimming behaviour and  
1405 routine activity of zebrafish *Danio rerio*. *J Exp Biol.* 203:813-820.

1406 Prokic, I., B.S. Cowling, and J. Laporte. 2014. Amphiphysin 2 (BIN1) in physiology and  
1407 diseases. *J Mol Med (Berl).* 92:453-463.

1408 Richter, T., M. Floetenmeyer, C. Ferguson, J. Galea, J. Goh, M.R. Lindsay, G.P.  
1409 Morgan, B.J. Marsh, and R.G. Parton. 2008. High-resolution 3D quantitative analysis  
1410 of caveolar ultrastructure and caveola-cytoskeleton interactions. *Traffic*. 9:893-909.  
1411 Rodriguez, G., T. Ueyama, T. Ogata, G. Czernuszewicz, Y. Tan, G.W. Dorn, 2nd, R.  
1412 Bogaev, K. Amano, H. Oh, H. Matsubara, J.T. Willerson, and A.J. Marian. 2011.  
1413 Molecular genetic and functional characterization implicate muscle-restricted coiled-  
1414 coil gene (MURC) as a causal gene for familial dilated cardiomyopathy. *Circ*  
1415 *Cardiovasc Genet*. 4:349-358.  
1416 Savio-Galimberti, E., J. Frank, M. Inoue, J.I. Goldhaber, M.B. Cannell, J.H. Bridge, and  
1417 F.B. Sachse. 2008. Novel features of the rabbit transverse tubular system revealed by  
1418 quantitative analysis of three-dimensional reconstructions from confocal images.  
1419 *Biophys J*. 95:2053-2062.  
1420 Schiaffino, S., M. Cantini, and S. Sartore. 1977. T-system formation in cultured rat  
1421 skeletal tissue. *Tissue Cell*. 9:437-446.  
1422 Seemann, E., M. Sun, S. Krueger, J. Troger, W. Hou, N. Haag, S. Schuler, M.  
1423 Westermann, C.A. Huebner, B. Romeike, M.M. Kessels, and B. Qualmann. 2017.  
1424 Deciphering caveolar functions by syndapin III KO-mediated impairment of caveolar  
1425 invagination. *eLife*. 6.  
1426 Sinha, B., D. Koster, R. Ruez, P. Gonnord, M. Bastiani, D. Abankwa, R.V. Stan, G.  
1427 Butler-Browne, B. Vedio, L. Johannes, N. Morone, R.G. Parton, G. Raposo, P. Sens,  
1428 C. Lamaze, and P. Nassoy. 2011. Cells respond to mechanical stress by rapid  
1429 disassembly of caveolae. *Cell*. 144:402-413.  
1430 Smith, K.A., A.K. Lagendijk, A.D. Courtney, H. Chen, S. Paterson, B.M. Hogan, C.  
1431 Wicking, and J. Bakkers. 2011. Transmembrane protein 2 (Tmem2) is required to  
1432 regionally restrict atrioventricular canal boundary and endocardial cushion  
1433 development. *Development*. 138:4193-4198.



- 1434 Smith, L.L., V.A. Gupta, and A.H. Beggs. 2014. Bridging integrator 1 (Bin1) deficiency  
1435 in zebrafish results in centronuclear myopathy. *Hum Mol Genet.* 23:3566-3578.
- 1436 Szabadosova, V., I. Boronova, P. Ferenc, I. Tothova, J. Bernasovska, M. Zigova, J.  
1437 Kmec, and I. Bernasovsky. 2018. Analysis of selected genes associated with  
1438 cardiomyopathy by next-generation sequencing. *J Clin Lab Anal.* 32.
- 1439 Tagawa, M., T. Ueyama, T. Ogata, N. Takehara, N. Nakajima, K. Isodono, S. Asada,  
1440 T. Takahashi, H. Matsubara, and H. Oh. 2008. MURC, a muscle-restricted coiled-coil  
1441 protein, is involved in the regulation of skeletal myogenesis. *Am J Physiol Cell Physiol.*  
1442 295:C490-498.
- 1443 Telfer, W.R., A.S. Busta, C.G. Bonnemann, E.L. Feldman, and J.J. Dowling. 2010.  
1444 Zebrafish models of collagen VI-related myopathies. *Hum Mol Genet.* 19:2433-2444.
- 1445 Thisse, C., and B. Thisse. 2008. High-resolution in situ hybridization to whole-mount  
1446 zebrafish embryos. *Nat Protoc.* 3:59-69.
- 1447 Tossavainen, H., O. Aitio, M. Hellman, K. Saksela, and P. Permi. 2016. Structural  
1448 Basis of the High Affinity Interaction between the Alphavirus Nonstructural Protein-3  
1449 (nsP3) and the SH3 Domain of Amphiphysin-2. *J Biol Chem.* 291:16307-16317.
- 1450 Varasteh Moradi, S., D. Gagoski, S. Mureev, P. Walden, K.A. McMahon, R.G. Parton,  
1451 W.A. Johnston, and K. Alexandrov. 2020. Mapping Interactions among Cell-Free  
1452 Expressed Zika Virus Proteins. *J Proteome Res.* 19:1522-1532.
- 1453 Villefranc, J.A., J. Amigo, and N.D. Lawson. 2007. Gateway compatible vectors for  
1454 analysis of gene function in the zebrafish. *Dev Dyn.* 236:3077-3087.
- 1455 Walser, P.J., N. Ariotti, M. Howes, C. Ferguson, R. Webb, D. Schwudke, N. Leneva,  
1456 K.J. Cho, L. Cooper, J. Rae, M. Floetenmeyer, V.M. Oorschot, U. Skoglund, K. Simons,  
1457 J.F. Hancock, and R.G. Parton. 2012. Constitutive formation of caveolae in a  
1458 bacterium. *Cell.* 150:752-763.

1459 Wang, S.C., S.A. Myers, N.A. Eriksson, R.L. Fitzsimmons, and G.E. Muscat. 2011.  
1460 Nr4a1 siRNA expression attenuates alpha-MSH regulated gene expression in 3T3-L1  
1461 adipocytes. *Mol Endocrinol.* 25:291-306.

1462 Way, M., and R.G. Parton. 1995. M-caveolin, a muscle-specific caveolin-related  
1463 protein. *FEBS Lett.* 376:108-112.

1464 Wienholds, E., F. van Eeden, M. Kusters, J. Mudde, R.H. Plasterk, and E. Cuppen.  
1465 2003. Efficient target-selected mutagenesis in zebrafish. *Genome Res.* 13:2700-2707.

1466 Wilkinson, R.N., S. Elworthy, P.W. Ingham, and F.J. van Eeden. 2013. A method for  
1467 high-throughput PCR-based genotyping of larval zebrafish tail biopsies.  
1468 *Biotechniques.* 55:314-316.

1469 Williams, R.J., T.E. Hall, V. Glattauer, J. White, P.J. Pasic, A.B. Sorensen, L.  
1470 Waddington, K.M. McLean, P.D. Currie, and P.G. Hartley. 2011. The in vivo  
1471 performance of an enzyme-assisted self-assembled peptide/protein hydrogel.  
1472 *Biomaterials.* 32:5304-5310.

1473 Wu, T., and T. Baumgart. 2014. BIN1 membrane curvature sensing and generation  
1474 show autoinhibition regulated by downstream ligands and PI(4,5)P2. *Biochemistry.*  
1475 53:7297-7309.

1476
